# Supplementary material
Source: HighWire-hosted journal article supplement (https://www.cmajopen.ca/highwire/filestream/80786/field_highwire_adjunct_files/6/open-2013-0073-original-submission.pdf)
Supplement: open-2013-0073-original-submission.pdf [file open-2013-0073-original-submission.pdf]

1  
2  
3  
4 Sulphonylurea monotherapy versus metformin in patients with type 2  
5 diabetes: a systematic review of randomized clinical trials with  
6 meta-analyses and trial sequential analyses  
7  
8

9  
10 Bianca Hemmingsen *physician*<sup>1</sup>, Jeppe B Schroll *PhD student*<sup>2</sup>, Søren S  
11 Lund *physician*<sup>3</sup>, Jørn Wetterslev *chief physician*<sup>1</sup>, Christian Gluud  
12 *chief physician and head of department*<sup>1</sup>, Allan Vaag *Professor*<sup>4</sup>,  
13 David P Sonne *PhD student*<sup>5</sup>, Lars H Lundstrøm *physician*<sup>6</sup>, Thomas  
14 Almdal *physician*<sup>5</sup>  
15  
16

17  
18 <sup>1</sup> Copenhagen Trial Unit, Centre for Clinical Intervention Research,  
19 Department 7812, Rigshospitalet, Copenhagen University Hospital,  
20 Blegdamsvej 9, DK-2100 Copenhagen, Denmark  
21

22 <sup>2</sup> Nordic Cochrane Centre, Rigshospitalet, Copenhagen University  
23 Hospital, Blegdamsvej 9, DK-2100 Copenhagen, Denmark  
24

25 <sup>3</sup> Private, Frederiksborgvej 139, DK-2400 Copenhagen, Denmark  
26

27 <sup>4</sup> Department of Endocrinology, Copenhagen University Hospital,  
28 Blegdamsvej 9, DK-2100 Copenhagen, Denmark  
29

30 <sup>5</sup> Department of Internal Medicine F, Copenhagen University Hospital  
31 Gentofte, University of Copenhagen, Niels Andersens Vej 65, 2900  
32 Hellerup, Denmark  
33

34 <sup>6</sup> Department of Anaesthesiology, Nordsjællands Hospital,  
35 Dyrehavevej 29, 3400 Hillerød, Denmark  
36  
37

38  
39 Correspondence to:

40 Bianca Hemmingsen,  
41 Copenhagen Trial Unit, Centre for Clinical Intervention Research,  
42 Department 7812, Rigshospitalet, Copenhagen University Hospital,  
43 Blegdamsvej 9, DK-2100 Copenhagen, Denmark.  
44

45 Telephone: +45 35 45 71 71  
46

47 E-mail: [biancahemmingsen@hotmail.com](mailto:biancahemmingsen@hotmail.com)  
48  
49  
50  
51  
52  
53  
54  
55  
56  
57  
58  
59  
60

**Abstract**

**Objectives** Guidelines recommend metformin as the first line oral treatment for patients with type 2 diabetes. To compare the benefits and harms of sulphonylurea monotherapy versus metformin in randomized clinical trials of patients with type 2 diabetes.

**Design** Cochrane systematic review of randomized clinical trials with meta-analyses and trial sequential analyses.

**Data sources** The Cochrane Library, Medline, Embase, Science Citation Index Expanded, Latin American Caribbean Health Sciences Literature, and Cumulative Index to Nursing and Allied Health Literature until August 2011. We also searched abstracts from major diabetes congresses, reference lists of included trials, (systematic) reviews, meta-analyses, and health technology assessments and contacted trial authors, pharmaceutical companies, and the US Food and Drug Administration homepage.

**Criteria for trial selection** Randomized clinical trials comparing sulphonylurea with metformin monotherapy in patients with type 2 diabetes, older than 18 years, and with an intervention period of at least 24 weeks. We included trials irrespective of language, publication status, antidiabetic interventions used before randomization, and predefined outcomes.

**Review methods** Two authors independently assessed trials for inclusion and extracted data related to interventions, outcomes, and risk of bias. The risk of random errors was assessed by trial sequential analysis.

**Results** We included 14 trials with 4560 participants. All trials were judged as high risk of bias. Data on patient-important outcomes were sparse. Sulphonylurea versus metformin did not significantly affect all-cause mortality (relative risk (RR) 0.98, 95% confidence interval (CI) 0.61 to 1.58) or cardiovascular mortality (RR 1.47, 95% CI 0.54 to 4.01). Sulphonylurea compared with metformin significantly decreased the risk of non-fatal macrovascular outcomes (RR 0.67, 95% CI 0.48 to 0.93; P=0.02). However, the definition varied among trials and trial sequential analyses showed that more trials are needed before reliable conclusions can be drawn. No difference between the interventions was found in random-effects model for change in fasting blood

1  
2  
3  
4 glucose or HbA1c. Sulphonylurea resulted in higher weight gain  
5 compared with metformin, a finding confirmed in trial sequential  
6 analysis. Sulphonylurea significantly increased mild hypoglycemia  
7 (RR 2.95, 95% CI 2.13 to 4.07; P<0.00001) and severe hypoglycemia  
8 (RR 5.64, 95% CI 1.22 to 26.00; P=0.03).  
9

10  
11 **Conclusions** There is some evidence suggesting that sulphonylurea  
12 compared with metformin may not affect all-cause or cardiovascular  
13 mortality while possibly decreasing the risk of non-fatal  
14 macrovascular outcomes and increase the risk of hypoglycemia in  
15 patients with type 2 diabetes. In general the amount of data is  
16 far too small and inconsistent to provide firm evidence concerning  
17 patient-important outcomes in relation to benefits and harms of  
18 sulphonylurea versus metformin monotherapy.  
19  
20  
21  
22  
23  
24  
25  
26  
27  
28  
29  
30  
31  
32  
33  
34  
35  
36  
37  
38  
39  
40  
41  
42  
43  
44  
45  
46  
47  
48  
49  
50  
51  
52  
53  
54  
55  
56  
57  
58  
59  
60

## Introduction

The American Diabetes Association and the European Association for the Study of Diabetes consensus algorithm for treatment of type 2 diabetes recommends initiation of metformin at diagnosis, or soon after, along with lifestyle interventions.<sup>1</sup> In patients where metformin cannot be used another oral antidiabetic agent might be prescribed, e.g., a sulphonylurea agent. The rationale for recommending metformin as first drug of choice in patients with type 2 diabetes seems to be based on its perceived beneficial effect on conventional surrogate outcomes, including weight, tolerability, and costs,<sup>1</sup> on the United Kingdom Prospective Diabetes Study (UKPDS) 34 trial outcomes in a selected small subgroup of 342 obese patients,<sup>2</sup> and on observational studies.<sup>3-5</sup>

The sulphonylureas are divided into different classes. The first-generation sulphonylureas (carbutamide, tolbutamide, acetohexamide, tolazamide, and chlorpropamide) were introduced in diabetes treatment in the 1950s.<sup>1;6-8</sup> The second-generation sulphonylureas (e.g., glibenclamide, glipizide, glibornuride, and gliclazide) and the third-generation sulphonylureas (glimepiride, gliclazide modified release (MR), and glipizide gastrointestinal therapeutic system (GITS) sulphonylureas) have almost completely replaced the first-generation sulphonylureas. The second- and third-generation sulphonylureas are preferred because of their perceived greater potency and perceived better safety profiles.<sup>1;6-8</sup>

The purpose of this systematic review was to assess whether the use of second- and third-generation sulphonylurea agents compared

1  
2  
3  
4 with metformin are associated with a different risk of benefits  
5 and harms of patient-important outcomes in patients with type 2  
6 diabetes.  
7  
8  
9

## 10 11 **Methods**

12  
13 This review follows the recommendations of the Cochrane  
14 Collaboration.<sup>9</sup> It is based on our published Cochrane protocol.<sup>10</sup> We  
15 included randomized clinical trials comparing sulphonylurea  
16 monotherapy versus other antidiabetic interventions, or placebo,  
17 or no intervention.<sup>10;11</sup> Trials were analysed according to the  
18 generation of sulphonylureas applied. In this paper we only report  
19 the data from the comparison of second-generation sulphonylurea  
20 and third-generation sulphonylurea versus metformin because, at  
21 present, it is the comparisons of greatest clinical relevance. The  
22 Cochrane version reports all comparisons.<sup>11</sup>  
23  
24  
25  
26  
27  
28  
29  
30  
31  
32  
33  
34

## 35 **Search strategy**

36 We searched the Cochrane Library, Medline, Embase, Science  
37 Citation Index Expanded, LILACS, and CINAHL in August 2011 for  
38 randomized clinical trials of sulphonylurea monotherapy versus  
39 other antidiabetic interventions or placebo or no intervention in  
40 patients with type 2 diabetes. Web appendix 1 describes the search  
41 terms and strategies for each database. We also searched abstracts  
42 presented at the American Diabetes Association and European  
43 Association for the Study of Diabetes congresses. We searched  
44 reference lists of included trials and (systematic) reviews, meta-  
45 analyses, health technology assessment reports and contacted trial  
46  
47  
48  
49  
50  
51  
52  
53  
54  
55  
56  
57  
58  
59  
60

1  
2  
3  
4 authors for additional unpublished trials, and the US Food and  
5 Drug Administration homepage.

6  
7 We contacted authors for information about additional trials.  
8  
9

### 10 11 12 13 14 15 **Trial selection**

16  
17 To determine which references to assess further, two authors (BH  
18 and LL, TA, or JS) independently screened the abstracts, titles,  
19 or both. All potentially relevant references were obtained as full  
20 text. Any disagreements were resolved by discussion, or if  
21 required by a third party (JW or CG).  
22  
23  
24  
25  
26  
27

28  
29 A trial was considered eligible if it was a randomized clinical  
30 trial (cross over or parallel) evaluating adult patients with type  
31 2 diabetes; had a duration of intervention of 24 weeks or more;  
32 and compared allocation to sulphonylurea monotherapy versus  
33 metformin.<sup>10,11</sup> We included trials irrespective of outcomes reported,  
34 language, or whether escape medicine was allowed if monotherapy  
35 failed.<sup>10,11</sup>  
36  
37  
38  
39  
40  
41  
42  
43

### 44 **Data extraction and bias assessment**

45  
46 Two authors (BH and LL, TA, JS, or DS) independently extracted  
47 information from each included trial using standard data  
48 extraction forms and assessed the risk of bias as advised in the  
49 Cochrane Handbook of Systematic Reviews of Interventions.<sup>9</sup>  
50  
51  
52  
53  
54  
55  
56  
57  
58  
59  
60

1  
2  
3  
4 We assessed the following risk of bias domains: sequence  
5 generation, concealment of allocation, blinding of participants  
6 and investigators, blinding of outcome assessors, incomplete  
7 outcome data, selective outcome reporting, academic bias and  
8 sponsor bias. We classified each domain as low, uncertain, or high  
9 risk of bias.<sup>10;11</sup> Web appendix 2 gives details. Discrepancies  
10 between authors' assessments were resolved by involvement of a  
11 third author (CG, AV, SL, or JW).  
12  
13  
14  
15  
16  
17  
18  
19

20  
21 We extracted baseline characteristics (such as age, duration of  
22 disease, and HbA1c) and outcomes from the included trials. Our  
23 predefined outcomes were all-cause mortality, cardiovascular  
24 mortality, non-fatal macrovascular outcomes as a composite  
25 outcome, non-fatal myocardial infarction, non-fatal stroke,  
26 amputation of lower extremity, cardiac or peripheral  
27 revascularization, microvascular outcomes as a composite outcome,  
28 nephropathy, retinal photocoagulation, adverse events, serious  
29 adverse events, drop-outs due to adverse events, mild  
30 hypoglycemia, severe hypoglycemia, cancer, intervention failure,  
31 change in fasting blood glucose from baseline, change in HbA1c  
32 from baseline, change in body mass index from baseline, change in  
33 weight from baseline, quality of life, and costs of  
34 intervention.<sup>10;11</sup> We sought any relevant missing information from  
35 the original author(s) of the randomized trial. When we identified  
36 more than one publication of an original trial, we assessed these  
37 together to maximise data collection. In case of substantial  
38 disagreements between older and newer publications, we contacted  
39 the authors.<sup>10;11</sup>  
40  
41  
42  
43  
44  
45  
46  
47  
48  
49  
50  
51  
52  
53  
54  
55  
56  
57  
58  
59  
60

1  
2  
3  
4 Translators extracted data from all relevant non-English articles.  
5  
6  
7

### 8 **Statistical analysis**

9 We used Review Manager version 5.1.7 for statistical analysis.<sup>12</sup>  
10 The medians reported in the included trials were assumed to be  
11 close to the arithmetic mean. Reported standard errors and  
12 confidence intervals were converted into standard deviations. We  
13 used both a random-effects model and a fixed-effect model.<sup>13;14</sup> In  
14 case difference in the statistical significance of the effect  
15 estimate between the two models, we reported both results;  
16 otherwise, we reported the random-effects model.<sup>10;11</sup>  
17  
18  
19  
20  
21  
22  
23  
24  
25  
26

27 We examined heterogeneity with the  $I^2$  statistic.<sup>9</sup>  $I^2$  of 50% or more  
28 indicated substantial heterogeneity.<sup>9</sup>  
29  
30  
31  
32

### 33 **Trial sequential analysis**

34 Trial sequential analyses of a meta-analysis is similar to interim  
35 analyses of a single trial, where group sequential monitoring  
36 boundaries are used to decide whether a trial could be terminated  
37 early if a P value is sufficiently small to show the anticipated  
38 effect.<sup>15-18</sup> There is no reason why the standards for a meta-analysis  
39 should be less rigorous than those for a single trial. With trial  
40 sequential analysis analogous trial sequential monitoring  
41 boundaries can be applied to a meta-analysis.<sup>15-19</sup> Cumulative meta-  
42 analyses of trials are at risk of increasing random errors because  
43 of sparse data and repetitive testing when the required  
44 information size (analogous to the sample size of an optimally  
45 powered clinical trial) has not been met. Trial sequential  
46  
47  
48  
49  
50  
51  
52  
53  
54  
55  
56  
57  
58  
59  
60



1  
2  
3  
4 analysis depends on the quantification of the required information  
5 size (the meta-analysis sample size). In this context, the smaller  
6 the required information size the more lenient the trial  
7 sequential monitoring boundaries are and, accordingly, the more  
8 lenient the criteria for statistical significance will be. We  
9 calculated the diversity ( $D^2$ ) adjusted required information size.<sup>18</sup>  
10 We did the trial sequential analyses with an intention to maintain  
11 an overall 5% risk of a type I error and 20% risk of a type II  
12 error for the primary outcomes and the secondary outcomes showing  
13 statistical significance in both random-effects model and fixed-  
14 effect model. On the basis of pre-determined criteria,<sup>10</sup> we  
15 calculated the required information size for the binary outcomes  
16 to detect or reject an intervention effect of a 10% relative risk  
17 reduction between the interventions. For the continuous outcomes  
18 the trial sequential analysis estimated the required information  
19 size to detect or reject the observed differences between the  
20 interventions. We used software Trial Sequential Analysis, version  
21 0.9.<sup>20</sup>  
22  
23  
24  
25  
26  
27  
28  
29  
30  
31  
32  
33  
34  
35  
36  
37  
38  
39

## 40 **Results**

### 41 **Results of the search and trial, participant, and intervention** 42 **characteristics**

43 We identified 11 049 references through electronic and hand  
44 searches (fig 1). After excluding duplicate reports, we screened  
45 7409 references. The excluded trials are listed in web appendix.  
46 Twenty-five publications describing 14 randomized clinical trials  
47 met our inclusion criteria for the comparison of second-generation  
48 or third-generation sulphonylurea versus metformin.<sup>2;21-44</sup>  
49  
50  
51  
52  
53  
54  
55  
56  
57  
58  
59  
60

1  
2  
3  
4  
5  
6 Most of the trials for this comparison were published in English.  
7 One trial was published in Chinese.<sup>42</sup> The trials included 4560  
8 participants of whom 2244 were randomized to second-generation or  
9 third-generation sulphonylurea versus 2313 randomized to metformin  
10 monotherapy. However, one trial did not describe which  
11 intervention group three of the participants were randomized to.<sup>31</sup>  
12 Table 1 shows characteristics of the fourteen included trials,  
13 table 2 shows characteristics of the interventions, and table 3  
14 shows baseline characteristics. The number of randomized  
15 participants in each trial ranged from 23 to 2902.<sup>21-28;36</sup> The  
16 duration of intervention varied from 24 weeks to 10.7 years. Six  
17 of the trials applied glibenclamide,<sup>2;21-27;30-36;39;40</sup> four trials applied  
18 gliclazide,<sup>29;36-38</sup> and one trial applied glipizide as second-  
19 generation sulphonylureas.<sup>28</sup> Three trials applied glimepiride as  
20 third-generation sulphonylurea.<sup>42-44</sup>

21  
22  
23  
24  
25  
26  
27  
28  
29  
30  
31  
32  
33  
34  
35  
36  
37 The United Kingdom Prospective Diabetes Study (UKPDS) 34 trial  
38 included overweight/obese participants with type 2 diabetes  
39 comparing intensive glycaemic control with metformin versus  
40 intensive glycaemic control with other antidiabetic interventions  
41 (chlorpropamide, glibenclamide, or insulin).<sup>2;40;41</sup> In this part of  
42 the trial, the vascular outcomes and mortality were only reported  
43 as metformin versus a combined group of the other interventions at  
44 the end of follow-up - not versus individual groups allocated to  
45 sulphonylurea or insulin.<sup>2</sup> Attempts to obtain the separate data on  
46 the sulphonylurea versus metformin were in vain.  
47  
48  
49  
50  
51  
52  
53  
54  
55  
56  
57  
58  
59  
60

1  
2  
3  
4 Two of the trials had a cross over design.<sup>31;39</sup> We only used data  
5 from the first period. The remaining nine trials had a parallel  
6 design. Nine of the trials were open labelled,<sup>2;28;29;31;37;38;40;42;43</sup> and  
7 five trials were blinding investigators and participants.<sup>21-27;30;32-36;39</sup>  
8  
9 Two trials did not describe the blinding of participants and  
10 investigators.<sup>36;44</sup> One of the trials involved an intervention arm  
11 with placebo, so we assumed this trial was designed to blind the  
12 investigators and participants.<sup>36</sup> The other trial not describing  
13 blinding was assumed to be open labelled.<sup>44</sup>  
14  
15  
16  
17  
18  
19  
20  
21  
22

### 23 **Bias risk assessment**

24  
25 All the trials were judged as high risk of bias on at least one  
26 bias domain (table 4). We divided the trials into those with a  
27 lower risk of bias and those with a high risk of bias based on the  
28 assessment of sequence generation, concealment of allocation, and  
29 blinding.<sup>9</sup> For detailed description see Web appendix 2. When we  
30 judged all three domains to be adequately assessed, we designated  
31 the trial as having a lower risk of bias. Table 4 reports the bias  
32 risk assessments of the included trials. Only three of the trials  
33 were considered to have lower risk of bias.<sup>21-27;32-35;39</sup>  
34  
35  
36  
37  
38  
39  
40  
41  
42  
43

### 44 **Clinical outcomes**

#### 45 ***All-cause mortality***

46  
47 The effect estimate of all-cause mortality was dominated by the A  
48 Diabetes Outcome Progression Trial (ADOPT) trial, which  
49 contributed with 62 out of 65 fatal events.<sup>21-27</sup> All-cause mortality  
50 was not significantly influenced by the interventions (relative  
51 risk 0.98, 95% confidence interval 0.61 to 1.58; 8 trials, 3768  
52  
53  
54  
55  
56  
57  
58  
59  
60

1  
2  
3  
4 participants;  $I^2=0\%$ ,  $P=0.68$ ; fig 2). Trial sequential analysis  
5  
6 showed that only 2.3% of the diversity-adjusted required  
7  
8 information size was accrued to detect or reject a 10% relative  
9  
10 risk reduction.

11  
12  
13 Sensitivity analysis excluding the trial with the longest  
14  
15 duration<sup>21-27</sup> and excluding the trials without describing how the  
16  
17 diagnosis of type 2 diabetes was established did not change the  
18  
19 statistical significance of the effect estimate. Sensitivity  
20  
21 analyses according to the language of publication, funding source,  
22  
23 or publication status could not be performed. Subgroup analyses  
24  
25 were not conducted, as none of the primary outcome measures  
26  
27 demonstrated statistically significant differences between the  
28  
29 intervention groups.

### 30 31 32 33 **Cardiovascular mortality**

34  
35 Cardiovascular mortality of sulphonylurea was not significantly  
36  
37 increased compared with metformin (relative risk 1.47, 95%  
38  
39 confidence interval 0.54 to 4.01; 8 trials, 3768 participants;  
40  
41  $I^2=0\%$ ,  $P=0.52$ ; fig 2). The total number of deaths due to  
42  
43 cardiovascular disease was 15 of which 12 were reported in the  
44  
45 ADOPT trial.<sup>21-27</sup> Trial sequential analysis showed that only 2.7% of  
46  
47 the diversity-adjusted required information size to detect or  
48  
49 reject a 10% relative risk reduction was accrued.

50  
51  
52 Sensitivity analysis excluding the trial with the longest  
53  
54 duration<sup>21-27</sup> as well as excluding the trials without describing how  
55  
56 the diagnosis of type 2 diabetes was established did not change  
57  
58  
59  
60

1  
2  
3  
4 the statistical significance of the effect estimate. Sensitivity  
5  
6 analyses according to the language of publication, funding source,  
7  
8 or publication status could not be performed. Subgroup analyses  
9  
10 were not conducted, as none of the primary outcome measures  
11  
12 demonstrated statistically significant differences between the  
13  
14 intervention groups.

### 15 16 17 ***Non-fatal macrovascular outcomes***

18  
19 Non-fatal macrovascular outcomes as a composite outcome were not  
20  
21 reported fully concordant with our predefined assessment of this  
22  
23 outcome (for macrovascular definitions in trials, see web appendix  
24  
25 4). The ADOPT trial and the Hermann et al. trial defined their  
26  
27 outcome in a manner, which may have included cardiac outcomes of a  
28  
29 non-atherosclerotic origin.<sup>21-27;32-35</sup> Tosi et al. reported that no  
30  
31 cardiovascular events were observed during the trial.<sup>39</sup> Yamnouchi  
32  
33 et al. reported no adverse cardiac events.<sup>44</sup> The ADOPT trial  
34  
35 included fatal myocardial infarctions in their composite  
36  
37 cardiovascular outcome. Also, the non-fatal macrovascular outcomes  
38  
39 in the ADOPT trial included congestive heart failure (9  
40  
41 participants in the glibenclamide group versus 19 in the metformin  
42  
43 group), which might not have an atherosclerotic origin. Owing to  
44  
45 the definition of 'cardiovascular disease' in the ADOPT trial it  
46  
47 is not possible to exclude the events of congestive heart failure.  
48  
49 We pooled the non-fatal macrovascular outcomes and found a  
50  
51 statistical significant reduction in favour of sulphonylureas  
52  
53 (relative risk 0.67, 95% confidence interval 0.48 to 0.93; P=0.02;  
54  
55 4 trials, 3094 participants;  $I^2=0\%$ , P=0.53; fig 2). Trial  
56  
57 sequential analysis showed that only 5% of the diversity-adjusted  
58  
59  
60

1  
2  
3  
4 required information size to detect or reject a 10% relative risk  
5 reduction was accrued and the trial sequential monitoring boundary  
6 for benefit was not crossed, meaning that firm evidence could not  
7  
8 be established (fig 3).  
9  
10

11  
12  
13 Thirty-nine non-fatal myocardial infarctions were reported, of  
14 which 36 originated from the ADOPT trial.<sup>21-27</sup> The effect estimate of  
15 non-fatal myocardial infarctions did not show statistical  
16 significant differences (relative risk 1.02, 95% confidence  
17 interval 0.37 to 2.85; 4 trials, 3061 participants;  $I^2=15\%$ ,  
18  $P=0.31$ ). For the remaining single components of the composite non-  
19 fatal macrovascular outcomes no meta-analysis could be conducted  
20 due to lack of data.  
21  
22  
23  
24  
25  
26  
27  
28  
29  
30

### 31 ***Microvascular outcomes***

32  
33 Meta-analysis of microvascular outcomes could not be performed due  
34 to lack of data.  
35  
36  
37  
38

### 39 ***Hypoglycemia***

40 Mild hypoglycemia was significantly increased with sulfonylurea  
41 (relative risk 2.95, 95% confidence interval 2.14 to 4.07;  
42  $P<0.00001$ ; 6 trials, 4075 participants;  $I^2=30\%$ ,  $P=0.22$ ; fig 3).  
43  
44 Trial sequential analysis showed that only 2.8% of the diversity-  
45 adjusted required information size to detect or reject a 10%  
46 relative risk increase was accrued (Web appendix 5). Due to the  
47 reporting in the trials, meta-analysis of moderate hypoglycemia  
48 could not be performed. Severe hypoglycemia showed significance  
49 for a lower risk with metformin (relative risk 5.64, 95%  
50  
51  
52  
53  
54  
55  
56  
57  
58  
59  
60

1  
2  
3  
4 confidence interval 1.22 to 25.99; P=0.03; 5 trials, 3656  
5  
6 participants;  $I^2=0\%$ , P=0.62; fig 3). Trial sequential analysis  
7  
8 showed that 0.1% of the diversity-adjusted required information  
9  
10 size to detect or reject a 10% relative risk increase was accrued.  
11  
12 Unfortunately, the UKPDS 34 publication did not report the number  
13  
14 of participants with hypoglycemia in each of the intervention arms  
15  
16 at the end of follow-up.<sup>2;40;41</sup> The data are therefore taken after one  
17  
18 year of follow-up. Reporting of hypoglycemia in trials is listed  
19  
20 in web appendix 6.

### 21 22 23 **Adverse events**

24  
25 The effect estimate for adverse events was not significantly  
26  
27 influenced by the interventions (relative risk 0.99, 95%  
28  
29 confidence interval 0.97 to 1.01; 5 trials, 3118 participants;  
30  
31  $I^2=0\%$ , P=0.76; fig 3). The effect-estimate of serious adverse  
32  
33 events did not show any significance (relative risk 0.94, 95%  
34  
35 confidence interval 0.82 to 1.07; 5 trials, 3175 participants;  
36  
37  $I^2=0\%$ ; P=0.99; fig 3). Six-hundred and forty-one participants  
38  
39 reported a serious adverse event, of which 639 were from the ADOPT  
40  
41 trial.<sup>21-27</sup> Drop-outs due to adverse events were not significantly  
42  
43 influenced by the interventions, but showed a tendency of  
44  
45 favouring metformin (relative risk 1.18, 95% confidence interval  
46  
47 0.98 to 1.41; 8 trials, 3731 participants;  $I^2=0\%$ , P=0.50; fig 3).  
48  
49 Reporting of adverse events in trials is listed in web appendix 6.

### 50 51 52 **Cancer**

53  
54 Only the ADOPT trial provided data on cancer (55 patients out of  
55  
56 1447 in the sulphonylurea arm; 50 patient out of 1455 in the  
57  
58  
59  
60

1  
2  
3  
4 metformin arm).<sup>21-27</sup> Meta-analysis could not be performed due to lack  
5  
6 of data.  
7  
8  
9  
10  
11  
12

### 13 ***Intervention failure***

14  
15 Intervention failure to monotherapy was not significantly  
16  
17 influenced by the interventions in the random-effects model  
18  
19 (relative risk 1.00, 95% confidence interval 0.66 to 1.53; 9  
20  
21 trials, 4238 participants; fig 3), but showed significance in the  
22  
23 fixed-effect model favouring metformin (relative risk 1.34, 95%  
24  
25 confidence interval 1.16 to 1.55;  $P < 0.0001$ ;  $I^2=59\%$ ,  $P=0.02$ ).  
26  
27  
28

### 29 ***Glycemic control***

30  
31 The change in HbA1c from baseline was not significantly different  
32  
33 comparing sulphonylurea versus metformin in random-effects model  
34  
35 (mean difference 0.06%, 95% confidence interval -0.16 to 0.29; 13  
36  
37 trials, 3632 participants; fig 4), but showed statistical  
38  
39 significance in favour of metformin in the fixed-effect model  
40  
41 (mean difference 0.20%, 95% confidence interval 0.13 to 0.28;  
42  
43  $P<0.00001$ ;  $I^2=75\%$ ,  $P<0.00001$ ). The change in fasting blood glucose  
44  
45 from baseline did not show any statistical significance in the  
46  
47 random-effects model (mean difference 0.22 mmol/L, 95% confidence  
48  
49 interval -0.08 to 0.52; 14 trials, 4172 participants;  $I^2=62\%$ ,  
50  
51  $P=0.001$ ; fig 4), but statistical significance favouring metformin  
52  
53 was present in the fixed-effect model (mean difference 0.30  
54  
55 mmol/L, 95% confidence interval 0.18 to 0.43).  
56  
57  
58  
59  
60



## Weight

The change in weight from baseline was significantly changed in favour of metformin compared with sulphonylurea (mean difference 3.77 kg, 95% confidence interval 3.06 to 4.47;  $P < 0.00001$ ; 7 trials, 3497 participants;  $I^2=39\%$ ,  $P=0.13$ ; fig 4). Trial sequential analysis showed firm evidence for the achieved differences of weight disregarding of risk of bias (Web appendix 5). Change in body mass index from baseline did not show statistical significance (mean difference  $0.13 \text{ kg/m}^2$ , 95% confidence interval -0.69 to 0.94; 5 trials, 322 participants;  $I^2=51\%$ ,  $P=0.08$ ; fig 4). However, only two of the trials included in the meta-analysis of changes in body mass index from baseline reported the actual change of the mean and standard deviation in each of the intervention groups.<sup>39;43</sup> For the remaining trials the end of follow-up values were used.<sup>29;37;44</sup> All of these trials had relatively small sample size. The sulphonylurea group had lower body mass index compared with the metformin group at baseline and at the end of follow-up in all of these trials.<sup>29;37;44</sup>

## Discussion

Based on our published protocol, we identified and meta-analysed eleven randomized clinical trials comparing the effects of sulphonylurea versus metformin monotherapy in patients with type 2 diabetes.<sup>10</sup> No significant differences were found between sulphonylurea versus metformin monotherapy on all-cause or cardiovascular mortality, but data were sparse. In contrast, a potential benefit of sulphonylurea over metformin was observed in relation to for non-fatal macrovascular outcomes. This potential

1  
2  
3  
4 benefit should however be interpreted with caution as the  
5  
6 definitions of the composite cardiovascular outcome for the two  
7  
8 trials contributing with data to this meta-analysis rendered it  
9  
10 impossible to identify, exclusively, the number of events with  
11  
12 atherosclerotic origin.<sup>21-27;32-35</sup> However, we cannot rule out the  
13  
14 clinical relevance of the events reported in the trials - being of  
15  
16 atherosclerotic origin or not - advocating for inclusion of all  
17  
18 reported events in the present meta-analysis. Moreover, trial  
19  
20 sequential analysis demonstrated that the amount of evidence was  
21  
22 insufficient to draw firm conclusions for mortality or any of the  
23  
24 vascular outcomes. All trials had high risk of bias in one or more  
25  
26 bias domains, and only three trials were considered to have lower  
27  
28 risk of bias.<sup>21-27;32-35;39</sup> Meta-analyses of patient-important outcomes  
29  
30 were based on very sparse data and did, except for non-fatal  
31  
32 macrovascular outcomes and severe hypoglycemia, not show any  
33  
34 significance of the effect estimates.  
35  
36

37 Metformin monotherapy seems to be associated with lower risk of  
38  
39 hypoglycemia and less pronounced weight gain compared with  
40  
41 sulphonylurea. However, only the changes in weight could be  
42  
43 confirmed in the trial sequential analysis and thus constitutes  
44  
45 the only firm evidence obtained from randomized clinical trials  
46  
47 disregarding the risk of bias to support the choice of metformin  
48  
49 over a sulphonylurea as monotherapy. The change in BMI from  
50  
51 baseline did not show statistical significance for the comparison  
52  
53 of sulphonylurea versus metformin, although we expected the latter  
54  
55 to be of most benefit in this regard. The reason for lack of  
56  
57  
58  
59  
60

1  
2  
3  
4 statistical significance is probably due to the way of reporting  
5 and the few number of trials contributing with data.<sup>29;37;39;43;44</sup>  
6  
7

### 8 9 10 **Strengths and limitations**

11 Our systematic review has several strengths. It is based on a  
12 published protocol, a comprehensive search strategy and rigid  
13 inclusion criteria for the randomized trials.<sup>10</sup> Two authors  
14 independently selected trials and extracted data. We contacted  
15 corresponding authors of all trials to clarify methodological  
16 details and outcomes. We evaluated the strength of the available  
17 evidence by assessing the risks of bias<sup>45-47</sup> and by using trial  
18 sequential analyses to control the risks of random errors.<sup>15;17;48;49</sup>  
19  
20  
21  
22  
23  
24  
25  
26  
27  
28

29 The weaknesses of our analyses and conclusions mirror the  
30 weaknesses of the included trials. Most importantly, all of the  
31 included trials were judged as high risk of bias in one or more  
32 bias domains. Only three of the included trials were classified as  
33 having lower risk of bias according to randomization, allocation,  
34 and blinding. We did not have access to data at the patient level  
35 and could therefore not perform analyses taking time on treatment  
36 into account. Because we could not include mortality or vascular  
37 event data from the UKPDS,<sup>2</sup> the present review consists exclusively  
38 of trials which did not predefine mortality or vascular events as  
39 their primary outcome - i.e., events were reported as adverse  
40 events. This might have lead to bias arising from trial design  
41 features such as lack of adjudication of events.  
42  
43  
44  
45  
46  
47  
48  
49  
50  
51  
52  
53  
54  
55  
56  
57  
58  
59  
60

1  
2  
3  
4 The participants of the included trials represented a diverse  
5 sample of the population with type 2 diabetes. The results of our  
6 review should therefore be interpreted with caution. The inclusion  
7 criteria varied among the trials, but nearly all trials excluded  
8 participants with existing co-morbidities, especially renal or  
9 hepatic disease. However, the diversity of patient characteristics  
10 is typical in real life, which may justify the clinical relevance  
11 of our results.  
12  
13  
14  
15  
16  
17  
18  
19  
20

### 21 **Relation to other studies and reviews**

22  
23 A Cochrane review compared the effect of metformin monotherapy  
24 versus other antidiabetic interventions.<sup>50</sup> However, this Cochrane  
25 review only included six randomized trials with a duration of the  
26 intervention of 24 weeks or more comparing second-generation or  
27 third-generation sulphonylurea versus metformin monotherapy.<sup>2;28-30;32-</sup>

32  
33 <sup>35;38;40</sup> Unlike our present review of sulphonylurea versus metformin  
34 monotherapy, the Cochrane review of metformin monotherapy could  
35 include mortality and vascular outcomes from United Kingdom  
36 Prospective Diabetes Study (UKPDS) as they compared metformin with  
37 any comparator and therefore applied the combined group of insulin  
38 and sulphonylurea reported by the UKPDS. However, like our review,  
39 not for metformin versus sulphonylurea.<sup>50</sup> The Cochrane review of  
40 metformin monotherapy made a pooled analysis of non-UKPDS trials  
41 having various comparators, which showed no significant difference  
42 for mortality or vascular outcomes.<sup>50</sup> A combined analysis of UKPDS  
43 and non-UKPDS trials was not made. Despite this, the conclusion  
44 from that Cochrane review was that metformin might be beneficial  
45 regarding cardiovascular outcomes in overweight/obese patients  
46  
47  
48  
49  
50  
51  
52  
53  
54  
55  
56  
57  
58  
59  
60

1  
2  
3  
4 with type 2 diabetes.<sup>50</sup> For the comparison of sulphonylurea versus  
5 metformin, we found statistical significant lower risk of mild as  
6 well as severe hypoglycemia in favour of metformin, but no  
7  
8 statistical significant change in terms of fasting blood glucose  
9  
10 and HbA1c in random-effects model. The Cochrane review of  
11  
12 metformin monotherapy found less hypoglycemia with metformin  
13  
14 compared with sulphonylurea and improved glycaemic control in terms  
15  
16 of fasting blood glucose and HbA1c.<sup>50</sup> However, we did only find  
17  
18 statistical significance for a lower fasting blood glucose and  
19  
20 HbA1c in favour of metformin in the fixed-effect model. This  
21  
22 questions this finding.  
23  
24

25  
26  
27 Several observational studies have indicated an increased risk of  
28  
29 mortality and cardiovascular disease with sulphonylurea compared  
30  
31 to metformin monotherapy.<sup>3-5</sup> Our data, based on randomized clinical  
32  
33 trials, did not find increased mortality with sulphonylurea  
34  
35 compared with metformin monotherapy. Contrary, although very  
36  
37 heterogeneously reported, the composite non-fatal macrovascular  
38  
39 outcome showed statistical significance in favour of  
40  
41 sulphonylurea. For both outcomes, we cannot exclude the risk of  
42  
43 random errors and more randomized clinical trials are needed. An  
44  
45 observational study has indicated that sulphonylureas may be  
46  
47 associated with different risks of macrovascular disease with  
48  
49 gliclazide, putatively, exhibiting greatest beneficial outcome  
50  
51 profile.<sup>4</sup> In the current analysis, we were unable to differentiate  
52  
53 effects between different types of sulphonylureas due to the  
54  
55 insufficient number of trials.  
56  
57  
58  
59  
60

1  
2  
3  
4 Unfortunately, we were not able to include patient-important data  
5 to the longest follow-up from the UKPDS trial.<sup>2</sup> The importance of  
6 the UKPDS trial is based on the length of the intervention, around  
7 10 years. According to the design article, the researchers planned  
8 to compare the subgroup of overweight/obese participants  
9 randomized to either sulphonylurea versus metformin monotherapy.<sup>40</sup>  
10 However, to our knowledge, these data have never been reported  
11 separately. Instead, the participants randomized to sulphonylurea  
12 and insulin are reported together, which preclude direct  
13 comparison of sulphonylurea versus metformin.<sup>2;40</sup> The largest trial,  
14 reporting patient-important outcomes for sulphonylurea monotherapy  
15 compared with metformin, is the ADOPT trial.<sup>21-27</sup> This trial showed  
16 statistically significant benefit in terms of time to treatment  
17 failure (the primary outcome) and HbA<sub>1c</sub> for metformin versus  
18 glibenclamide after about four years of follow-up. Contrary, a  
19 numerical lower number of cardiovascular events appeared with  
20 sulphonylurea versus metformin. However, like the UKPDS trial, the  
21 ADOPT trial has never published statistical tests of the  
22 cardiovascular events comparing the sulphonylurea and metformin  
23 groups. As yet, this is only available from meta-analyses, like  
24 the present. A later re-analysis of the ADOPT taking into account  
25 the differences in time on treatment between interventions did not  
26 bring clarity about the presence of any statistically significant  
27 differences in cardiovascular risk between the metformin and  
28 glibenclamide groups.<sup>24</sup>

29  
30  
31  
32  
33  
34  
35  
36  
37  
38  
39  
40  
41  
42  
43  
44  
45  
46  
47  
48  
49  
50  
51  
52  
53  
54 In our Cochrane review we also compared first-generation  
55 sulphonylurea versus metformin.<sup>11</sup> However, no meta-analyses could  
56  
57  
58  
59  
60

1  
2  
3  
4 be performed versus metformin for any of the patient-important  
5  
6 outcomes due to lack of data.<sup>11</sup>  
7  
8

9  
10 A recent randomized trial by Hong et al. in about 300 Chinese  
11 patients with type 2 diabetes and existing coronary artery disease  
12 indicated a significant benefit in favour of metformin compared  
13 with glipizide for the primary composite cardiovascular outcome  
14 after around 3 years.<sup>51</sup> Notably, the primary outcome was not  
15 reported after 3 years, but after a median follow up of about 5  
16 years - i.e., about two years after the trial medication was  
17 stopped. This trial was published after the database search of our  
18 present systematic review was finalised and has therefore not been  
19 included in our systematic review. Implementing the patient-  
20 important data from Hong et al. into our meta-analysis did not  
21 change the significance of the effect estimates for the primary  
22 outcomes or for non-fatal myocardial infarction, although the  
23 composite outcome of non-fatal macrovascular complications did no  
24 longer reach statistical significance (relative risk 0.86, 95%  
25 confidence interval 0.49 to 1.50 with sulphonylurea versus  
26 metformin). The discrepancy of the result of this relatively small  
27 trial and our current meta-analysis comprising substantially more  
28 number of patients underscores the need for further randomized  
29 trials with low risk of bias, and, in particular, in broader  
30 populations, to clarify the benefits and harms of sulphonylurea  
31 versus metformin in patients with type 2 diabetes.  
32  
33  
34  
35  
36  
37  
38  
39  
40  
41  
42  
43  
44  
45  
46  
47  
48  
49  
50  
51

#### 52 53 **Clinical implementations** 54 55 56 57 58 59 60

1  
2  
3  
4 Treatment recommendations from international medical societies do  
5 not recommend sulphonylurea as first-line antidiabetic drug.<sup>1</sup> The  
6 most widespread guidelines recommend metformin as first-line  
7 therapy.<sup>1;52;53</sup> This recommendation is likely to be highly influenced  
8 by the results from the subgroup of overweight/obese participants  
9 in the UKPDS trial, a trial of limited size and possible bias in  
10 the reporting of the comparison of sulphonylurea versus metformin  
11 (because UKPDS apparently did not adhere to the predefined  
12 statistical analysis plan from the design article). Additional  
13 factors such as price, a likely beneficial effect on weight as  
14 well as a number of potentially biased retrospective analyses,  
15 have all together made sulphonylurea as monotherapy less used.<sup>2;40;54</sup>  
16 Sulphonylurea is now largely prescribed as a part of a combination  
17 regime.<sup>54</sup> The use of sulphonylurea has to a large extent been  
18 replaced with the novel, and with respect to hard outcome  
19 variables, as yet, unproven but more expensive dipeptidyl  
20 peptidase IV-inhibitors.<sup>54</sup> On the basis of the present results, we  
21 strongly recommend that future glucose lowering interventions in  
22 type 2 diabetes should be based on evidence from high quality  
23 randomized long-term trials assessing patient-important outcomes.  
24  
25  
26  
27  
28  
29  
30  
31  
32  
33  
34  
35  
36  
37  
38  
39  
40  
41  
42  
43  
44

#### 45 **Differences between protocol and review**

46 David Peick Sonne and Jeppe Schroll joined as authors after  
47 publication of the protocol. Christina Hemmingsen withdrew as an  
48 author after publication of the protocol. The title of the review  
49 is different from the protocol as we only were allowed from the  
50 Cochrane Metabolic and Endocrine Disorders Group to focus on the  
51 sulphonylureas. After advice from the Cochrane Metabolic and  
52  
53  
54  
55  
56  
57  
58  
59  
60



1  
2  
3  
4 Endocrine Disorder Group, we changed the inclusion of trials to  
5 have duration of 24 weeks or more and avoided combination  
6  
7 therapies. It was not predefined to search the US Food and Drug  
8  
9 Administration homepage. We originally planned to assess baseline  
10  
11 imbalance and early stopping as bias components, but did not do  
12  
13 this, based on decisions taken at the Cochrane Colloquium 2010. We  
14  
15 did not search for ongoing trials. The assessment of change in  
16  
17 weight from baseline was not described in the protocol. When no  
18  
19 differences in mean and standard deviations for the continuous  
20  
21 outcomes were reported in trials, we used the end of follow-up  
22  
23 values, if available.  
24  
25  
26  
27  
28  
29  
30

### 31 **Acknowledgements**

32  
33 We thank Bernd Richter and The Cochrane Metabolic and Endocrine  
34  
35 Disorder Group for valuable assistance. We thank Karla Bergerhoff,  
36  
37 the Trials Search Co-ordinator of The Cochrane Metabolic and  
38  
39 Endocrine Disorders Group, and Sarah Klingenberg, the Trials  
40  
41 Search Co-ordinator of The Cochrane Hepato-Biliary Group, for  
42  
43 their assistance in developing the search strategy. We would like  
44  
45 to thank Drs Andy Diehl, Hikura Koide, Paolo Moghetti, Floris van  
46  
47 de Laar, Andrew Harrower, Leif Hermann, and Kåre Birkeland for  
48  
49 providing additional information on the trials they were involved  
50  
51 in. The authors would like to thank Angel Rodriguez and Mads  
52  
53 Engelmann from Lilly for providing additional data. Additional  
54  
55 data for the APPROACH and ADOPT trials are submitted by  
56  
57 GlaxoSmithKline Pharmaceuticals, Metabolic & Cardiovascular Unit.  
58  
59  
60

1  
2  
3  
4 We acknowledge TrygFonden for providing funding for this  
5 systematic review. Allan Vaag received financial support from the  
6 Danish National Type 2 Diabetes (DD2) study (<http://dd2.nu/>).  
7  
8  
9

10  
11 This review is also published as a Cochrane systematic review in  
12 The Cochrane Database of Systematic Reviews 2013, Issue 4.  
13  
14 Cochrane reviews are regularly updated as new evidence emerges and  
15 in response to comments and criticism, and the Cochrane Database  
16 of Systematic Reviews should be consulted for the most recent  
17 version of the review.  
18  
19  
20  
21  
22  
23  
24

### 25 **Contributors**

26  
27 BH developed the protocol and was responsible for the searches,  
28 selected trials, extracted data, assessed the risk of bias,  
29 conducted the analysis, and contacted authors. JBS selected  
30 trials, extracted data, assessed the risk of bias, and advised on  
31 interpretation of the data. SSL developed the protocol and advised  
32 on interpretation of the data. JW developed the protocol, advised  
33 on statistical methods, data analyses, and advised on  
34 interpretation of the data. CG developed the protocol, advised on  
35 statistical methods and interpretation of data. AV developed the  
36 protocol and advised on interpretation of the data. DPS extracted  
37 data, assessed the risk of bias, and advised on interpretation of  
38 the data. LHL developed the protocol, selected trials, extracted  
39 data, and assessed the risk of bias. TA selected trials, extracted  
40 data, assessed the risk of bias, and advised on interpretation of  
41 the data. All authors read and approved the final manuscript, and  
42  
43  
44  
45  
46  
47  
48  
49  
50  
51  
52  
53  
54  
55  
56  
57  
58  
59  
60

1  
2  
3  
4 were involved in the development of the final review. BH and TA  
5 are the guarantors.  
6  
7  
8

9  
10 **Competing interest**

11 SSL, AV, and TA have equity in Novo Nordisk A/S. SSL and AV  
12 received fees from Novo Nordisk A/S for speaking. TA was employed  
13 at Steno Diabetes Centre, Gentofte, Denmark during development of  
14 the protocol and the review. Steno Diabetes Centre is owned by  
15 Novo Nordisk A/S. SSL and AV were employed at Steno Diabetes  
16 Centre when the protocol was published and the work on the review  
17 was initiated. SSL is now employed with Boehringer Ingelheim,  
18 Ingelheim, Germany and AV at Rigshospitalet, Copenhagen, Denmark.  
19  
20  
21  
22  
23  
24  
25  
26  
27  
28

29 **Ethical approval**

30 Not needed.  
31  
32  
33  
34

35 **Funding**

36 TrygFonden and the Copenhagen Insulin and Metformin Therapy Trial  
37 Group, Denmark.  
38

39 The Copenhagen Trial Unit; Centre for Clinical Intervention  
40 Research, Rigshospitalet, Copenhagen University Hospital, Denmark.  
41  
42  
43  
44

45 **Data sharing**

46 No additional data available.  
47  
48  
49  
50  
51  
52  
53  
54  
55  
56  
57  
58  
59  
60

Table 1. Characteristics of the included trials

| Trial                                         | Location                          | Design                                              | No of participants sulphonylurea/metformin (total) participants | Duration of intervention               |
|-----------------------------------------------|-----------------------------------|-----------------------------------------------------|-----------------------------------------------------------------|----------------------------------------|
| <b>ADOPT, 2006</b> <sup>21-27</sup>           | North America, Europe, and Canada | Parallel Blinding investigator s and participants   | 1447/1455 (2902)                                                | 4 years                                |
| <b>Campbell et al., 1994</b> <sup>28</sup>    | United Kingdom                    | Parallel Open label                                 | 24/24 (48)                                                      | 1 year                                 |
| <b>Collier et al 1989</b> <sup>29</sup>       | NR                                | Parallel Open label                                 | 12/12 (24)                                                      | 6 months                               |
| <b>DeFronzo et al., 1995</b> <sup>30</sup>    | United States of America          | Parallel Blinding investigator s and participants   | 209/210 (419)                                                   | 29 weeks                               |
| <b>Derosa et al., 2004</b> <sup>43</sup>      | Italy                             | Parallel Open label                                 | 81/83 (164)                                                     | 12 months (+ 8 weeks titration period) |
| <b>Hermann et al., 1991</b> <sup>31#</sup>    | Sweden                            | Cross over Open label                               | 10/12 (25)                                                      | 6 months                               |
| <b>Hermann et al., 1991a</b> <sup>32-35</sup> | Sweden                            | Parallel Blinding investigator s and participants   | 34/38 (72)                                                      | 6 months+ 2-12 weeks                   |
| <b>Kamel et al., 1997</b> <sup>36*</sup>      | Turkey                            | Parallel Blinding investigator s and participants   | 17/6 (23)                                                       | 24 weeks                               |
| <b>Lawrence et al., 2004</b> <sup>37</sup>    | United Kingdom                    | Parallel Open label                                 | 22/21 (43)                                                      | 24 weeks                               |
| <b>Tang et al., 2004</b> <sup>42</sup>        | China                             | Parallel Open label                                 | 33/29 (62)                                                      | 6 months                               |
| <b>Tessier et al., 1999</b> <sup>38§</sup>    | Canada                            | Parallel Open label                                 | 19/20 (39)                                                      | 24 weeks                               |
| <b>Tosi et al., 2003</b> <sup>39</sup>        | Italy                             | Cross over Blinding investigator s and participants | 22/22 (44)                                                      | 6 months                               |

|                                              |                |                                   |               |            |
|----------------------------------------------|----------------|-----------------------------------|---------------|------------|
| <b>UKPDS 34, 1998</b> <sup>2;40;41</sup>     | United Kingdom | Parallel Open label               | 277/342 (619) | 10.7 years |
| <b>Yamanouchi et al., 2005</b> <sup>44</sup> | Japan          | Parallel NR, we assume open label | 37/39 (76)    | 12 months  |

ADOPT=A Diabetes Outcome Progression Trial; NR=not reported;

UKPDS=United Kingdom Prospective Diabetes Study

#Number of participants randomized to each intervention arm not reported. Only the participants who finished the trial

\*The 17 participants in the sulphonylurea arm is addition of the gliclazide arm (9 participants) and the glibenclamide arm (8 participants)

#: Only baseline characteristics on the participants who completed the trial (36 out of 39)

Confidential

Table 2. Characteristics of the intervention

| Trial                                      | Sulphonylurea intervention                                                                                          | Metformin intervention                                                                                                                                                                                                                               | Plan in case of monotherapy failure                | Intervention arm in study, not included in this analysis |
|--------------------------------------------|---------------------------------------------------------------------------------------------------------------------|------------------------------------------------------------------------------------------------------------------------------------------------------------------------------------------------------------------------------------------------------|----------------------------------------------------|----------------------------------------------------------|
| <b>ADOPT, 2006</b> <sup>21-27</sup>        | Glibenclamide, po., initial 2.5 mg, then up to 15 mg /day given as 7.5 mg twice daily                               | Metformin, po., initial 500 mg, then up to 2 gm (1 gram twice a day)                                                                                                                                                                                 | Escape medicine not allowed, participants excluded | Rosiglitazone                                            |
| <b>Campbell et al., 1994</b> <sup>28</sup> | Glipizide, po., initiated at 5 mg once daily to a maximum divided daily dose of 15 mg                               | Metformin, po., initial 500 mg, increased with 500 mg at each visit (every second week) to a maximum at 3 gram                                                                                                                                       | NR                                                 |                                                          |
| <b>Collier et al., 1989</b> <sup>29</sup>  | Gliclazide, po., doses from 80-240 mg/day                                                                           | Metformin, po., doses from 1.5-3.0 gram/day                                                                                                                                                                                                          | NR                                                 | Healthy controls                                         |
| <b>DeFronzo et al., 1995</b> <sup>30</sup> | Glibenclamide, po., initially 5 mg twice daily for the first week and then 10 mg twice daily plus metformin placebo | Metformin, po., initially one 500 mg tablet of metformin. After one week the metformin dose was increased to 1000 mg per day by adding a 500 mg tablet to the breakfast meal. After two weeks the metformin dose was increased to 1500 mg per day by | Escape medicine not allowed, participants excluded | Combination of metformin plus glibenclamide              |

|                                               |                                                                                                                      |                                                                                                                                                                                                                                                                                                                         |                         |                                             |
|-----------------------------------------------|----------------------------------------------------------------------------------------------------------------------|-------------------------------------------------------------------------------------------------------------------------------------------------------------------------------------------------------------------------------------------------------------------------------------------------------------------------|-------------------------|---------------------------------------------|
|                                               |                                                                                                                      | adding a 500 mg tablet to be taken at lunch. After three weeks the dose was increased to 2000 mg per day by adding a second 500 mg tablet to be taken with the evening meal, and after four weeks the daily dose was increased to 2500 mg by adding a second 500 mg tablet to the breakfast dose. Glibenclamide placebo |                         |                                             |
| <b>Derosa et al., 2004</b> <sup>43</sup>      | Glimepiride, po., initial dose of 1 mg/day, which was up titrated to a maximum of 2 mg twice a day (total dose 4 mg) | Metformin, po., initial dose 1000 mg/day, up titrated to a maximum dose of 1000 mg 3 times a day (total dose 3000 mg/day)                                                                                                                                                                                               | Escape medicine allowed |                                             |
| <b>Hermann et al., 1991</b> <sup>31</sup>     | Glibenclamide, po., 1.75-10.5 mg daily                                                                               | Metformin, po., 0.5-3 gram                                                                                                                                                                                                                                                                                              | NR                      |                                             |
| <b>Hermann et al., 1991a</b> <sup>32-35</sup> | Glibenclamide, po., initial 3.5 mg. Up to 14.0 mg. Tablets given shortly before breakfast and if daily dosis         | Metformin, po., initial 1 gram. 1.0-3.0 gram in two doses a day - shortly before breakfast and evening meal.                                                                                                                                                                                                            | Escape medicine allowed | Combination of metformin plus glibenclamide |

|                                           |                                                                                                                                                                              |                                                                                                                                         |                                                    |                                             |
|-------------------------------------------|------------------------------------------------------------------------------------------------------------------------------------------------------------------------------|-----------------------------------------------------------------------------------------------------------------------------------------|----------------------------------------------------|---------------------------------------------|
|                                           | exceeded 7 mg then divided between breakfast and evening meal<br>Placebo<br>metformin                                                                                        | Placebo<br>glibenclamide                                                                                                                |                                                    |                                             |
| <b>Kamel et al., 1997<sup>36</sup></b>    | Gliclazide and Glibenclamide                                                                                                                                                 | Metformin                                                                                                                               | NR                                                 | Acarbose and placebo                        |
| <b>Lawrence et al., 2004<sup>37</sup></b> | Gliclazide, po., 80 mg once daily, uptitrated up to 160 mg once daily depending on fasting blood glucose                                                                     | Metformin, po., initial 500 mg twice a day, uptitrated up to 1 gram three times a day depending on fasting blood glucose                | Escape medicine not allowed, participants excluded | Pioglitazone                                |
| <b>Tang et al., 2004<sup>42</sup></b>     | Glimepiride, po., 1 to 2 mg/day                                                                                                                                              | Metformin, po., 750 to 1500 mg/day                                                                                                      | NR                                                 |                                             |
| <b>Tessier et al., 1999<sup>38</sup></b>  | Gliclazide, po., titrated to glycemic target. Gliclazide was increased with the intervals: 80, 160, 240, and 320 mg/d divided into two doses with breakfast and evening meal | Metformin, po., titrated to glycemic target. Metformin dosage was 750, 1500 and 2250 mg (divided into three doses) one with each meal   | NR                                                 |                                             |
| <b>Tosi et al., 2003<sup>39</sup></b>     | Glibenclamide, po., starting dose was 1 tablet before lunch, consisting of glibenclamide 5 mg. The subsequent steps were 1 tablet twice daily (before breakfast and before   | Metformin, po., starting dose was 1 tablet before lunch, consisting of metformin 500 mg. The subsequent steps were 1 tablet twice daily | Escape medicine not allowed, participants excluded | Combination of metformin plus glibenclamide |



|                                                           |                                                                                                                                                                                                                                                                                                                                                                                     |                                                                                                                                                                                                                                                                                                                                                                                                                 |                                        |                                        |
|-----------------------------------------------------------|-------------------------------------------------------------------------------------------------------------------------------------------------------------------------------------------------------------------------------------------------------------------------------------------------------------------------------------------------------------------------------------|-----------------------------------------------------------------------------------------------------------------------------------------------------------------------------------------------------------------------------------------------------------------------------------------------------------------------------------------------------------------------------------------------------------------|----------------------------------------|----------------------------------------|
|                                                           | <p>dinner),<br/>2 tablets<br/>twice daily<br/>(before<br/>breakfast and<br/>before<br/>dinner), and<br/>2 tablets<br/>three times<br/>daily<br/>(before<br/>breakfast,<br/>before lunch,<br/>and before<br/>dinner). For<br/>the group<br/>treated with<br/>glibenclamide<br/>alone,<br/>the last 2<br/>steps were 1<br/>tablet of<br/>active drug<br/>+1 tablet of<br/>placebo</p> | <p>(before<br/>breakfast<br/>and before<br/>dinner), 2<br/>tablets<br/>twice<br/>daily<br/>(before<br/>breakfast<br/>and before<br/>dinner), and<br/>2 tablets<br/>three times<br/>daily<br/>(before<br/>breakfast,<br/>before<br/>lunch, and<br/>before<br/>dinner).<br/>Therefore<br/>scheduled<br/>dose steps<br/>were 0.5, 1,<br/>2,<br/>3 gram/d for<br/>metformin</p>                                     |                                        |                                        |
| <p><b>UKPDS 34,</b><br/><b>1998</b><sup>2;40;41</sup></p> | <p>Glibenclamide<br/>, po., 2.5-20<br/>mg</p>                                                                                                                                                                                                                                                                                                                                       | <p>Metformin,<br/>po., 850 mg<br/>tablet per<br/>day, then<br/>850 mg twice<br/>daily, and<br/>then 1700 mg<br/>in the<br/>morning<br/>and 850 mg<br/>with the<br/>evening meal<br/>(maximum<br/>dose=2550<br/>mg). If on<br/>any dose,<br/>symptoms of<br/>diarrhoea<br/>or nausea<br/>occurred,<br/>patients<br/>reduced the<br/>dose to that<br/>which<br/>previously<br/>did not<br/>cause<br/>symptoms</p> | <p>Escape<br/>medicine<br/>allowed</p> | <p>Chlorpropamid<br/>e and insulin</p> |

1  
2  
3  
4  
5  
6  
7  
8  
9  
10  
11  
12  
13  
14  
15  
16  
17  
18  
19  
20  
21  
22  
23  
24  
25  
26  
27  
28  
29  
30  
31  
32  
33  
34  
35  
36  
37  
38  
39  
40  
41  
42  
43  
44  
45  
46  
47  
48  
49  
50  
51  
52  
53  
54  
55  
56  
57  
58  
59  
60

|                                             |                                     |                                             |                         |              |
|---------------------------------------------|-------------------------------------|---------------------------------------------|-------------------------|--------------|
| <b>Yamanouchi et al., 2005<sup>44</sup></b> | Glimepiride, po., 1.0 to 2.0 mg/day | Metformin, po., tablet a 250 mg, 750 mg/day | Escape medicine allowed | Pioglitazone |
|---------------------------------------------|-------------------------------------|---------------------------------------------|-------------------------|--------------|

ADOPT=A Diabetes Outcome Progression Trial; mg=milligram; NR=not reported; po.= peroral; UKPDS=United Kingdom Prospective Diabetes Study

Confidential

Table 3. Baseline characteristics

| Trial                                        | Duration of type 2 diabetes (years)                                                                                                                         | Age (years)                 | HbA1c (%)                                                                         | Body mass index (kg/m <sup>2</sup> ) |
|----------------------------------------------|-------------------------------------------------------------------------------------------------------------------------------------------------------------|-----------------------------|-----------------------------------------------------------------------------------|--------------------------------------|
| ADOPT, 2006 <sup>21-27#</sup>                | Expressed in publication as: <1 year; 1-2 years; and >2 years. Participants had to be diagnosed with type 2 diabetes within 3 years from screening to trial | 56.4 (10.2)/<br>57.9 (9.9)  | 7.4 (0.9)/ 7.4 (0.9)                                                              | 32.3 (6.3)/<br>32.1 (6.1)            |
| Campbell et al., 1994 <sup>28</sup>          | 2.8 (3.9)/<br>2.3 (3.2)                                                                                                                                     | 57 (9)/<br>57 (10)          | 11.8 (2.1)/<br>11.5 (1.9)                                                         | 31.2 (6.6)/<br>29.6 (5.6)            |
| Collier et al., 1989 <sup>29</sup>           | All newly diagnosed                                                                                                                                         | 55.5 (5.1)/<br>53.1 (5.1)   | 11.7 (1.5)/<br>12.1 (2.4)                                                         | 23.1 (1.3)/<br>24.3 (1.4)            |
| DeFronzo et al., 1995 <sup>30</sup> $\alpha$ | 8.7 (5.8)/<br>8.4 (5.8)                                                                                                                                     | 56 (14.5)/<br>55 (14.5)     | 8.5 (1.4)/ 8.9 (1.4)                                                              | 29.1 (4.3)/<br>29.0 (4.3)            |
| Derosa et al., 2004 <sup>43</sup>            | NR, but all participants had to be diagnosed within 6 months from entry to the trial                                                                        | 54 (10)/<br>56 (9)          | 8.5 (1.2)/ 8.4 (1)                                                                | 27.6 (1.2)/<br>28.1 (1.5)            |
| Hermann et al., 1991 <sup>31e</sup>          | All patients:<br>7.6 (1/3-24)                                                                                                                               | All patients:<br>58.9 (8.8) | 8.1 (1.0)/ 7.9 (1.6)                                                              | All patients:<br>26.2 (3.8)          |
| Hermann et al., 1991a <sup>32-35?</sup>      | All patients:<br>3.6 (0-38)                                                                                                                                 | All patients:<br>59.4 (8.8) | 6.7 (1.7)/ 6.9 (1.8)                                                              | All patients:<br>28.3 (4.6)          |
| Kamel et al., 1997 <sup>36</sup>             | NR                                                                                                                                                          | NR                          | Gliclazide:<br>8.4 (1.1);<br>glibenclamide:<br>8.4 (1.1);<br>metformin: 8.4 (0.5) | NR                                   |
| Lawrence et al., 2004 <sup>37f</sup>         | NR                                                                                                                                                          | 63.5 (11.4)/<br>59.5        | 7.9 (0.9)/ 8.0 (0.9)                                                              | 28.7 (28.3-<br>34.4)/                |

|                                             |                         |                                 |                         |                              |
|---------------------------------------------|-------------------------|---------------------------------|-------------------------|------------------------------|
|                                             |                         | (9.3)                           |                         | 29.2<br>(28.1-<br>31.6)      |
| <b>Tang et al., 2004<sup>42</sup></b>       | NR                      | 56.4<br>(8.8)/<br>53.8<br>(9.7) | 6.8 (1.6)/<br>7.2 (1.4) | 23.3<br>(1.7)/<br>24.6 (2.2) |
| <b>Tessier et al., 1999<sup>38</sup></b>    | 4.7 (6.1)/<br>5.4 (6.5) | 59.3<br>(7.3)/<br>59.1<br>(7.1) | 7.8 (1.8)/ 7.1<br>(1.7) | 28.6<br>(4.0)/<br>29.3 (3.0) |
| <b>Tosi et al., 2003<sup>39</sup></b>       | 9.9 (6.6)               | 57.9<br>(7.5)/<br>58.2<br>(7.3) | 7.9 (1.0)/ 7.7<br>(0.9) | 26.3<br>(2.3)/<br>26.4 (2.7) |
| <b>UKPDS 34, 1998<sup>2;40;41</sup></b>     | All newly<br>diagnosed  | 53 (9)/<br>53 (8)               | 7.2 (1.5)/ 7.3<br>(1.5) | 31.5<br>(4.4)/<br>31.6 (4.2) |
| <b>Yamanouchi et al., 2005<sup>44</sup></b> | 3.3 (2.6)/<br>3.0 (2.5) | 55.6<br>(9.3)/<br>54.7<br>(9.8) | 9.8 (0.7)/ 9.9<br>(0.7) | 25.6<br>(3.5)/<br>26.2 (3.8) |

ADOPT=A Diabetes Outcome Progression Trial; NR=not reported;

UKPDS=United Kingdom Prospective Diabetes Study

#: Baseline characteristics only reported for the participants who received a dose of the study drug (glibenclamide: 1441; rosiglitazone: 1456; metformin: 1454)

σ: All standard deviations are calculated from standard errors.

Fasting plasma glucose values are converted from mg/dl to mmol/L

&: Only baseline characteristics on the 22 participants who completed the trial. Duration of disease is mean (range)

?: Standard deviations for HbA1c are calculated from standard errors

!: Baseline variables only reported for the participants completing the trial (20 in each intervention arm). Median (interquartile range) for body mass index

?: Only baseline characteristics on the participants who completed the trial (36 out of 39)

Table 4. Risk of bias in the included trials

| Trial                                          | Sequence generation | Allocation concealment | Blinding of participants and personnel | Blinding of outcome assessors | Incomplete outcome data | Selective reporting | Academic bias | Sponsor bias |
|------------------------------------------------|---------------------|------------------------|----------------------------------------|-------------------------------|-------------------------|---------------------|---------------|--------------|
| <b>ADOPT</b> , 2006 <sup>21-27</sup>           | Adequate            | Adequate               | Adequate                               | Adequate                      | Adequate                | Adequate            | Adequate      | Inadequate   |
| <b>Campbell et al.</b> , 1994 <sup>28</sup>    | Unclear             | Unclear                | Inadequate                             | Inadequate                    | Adequate                | Unclear             | Adequate      | Unclear      |
| <b>Collier et al.</b> , 1989 <sup>29</sup>     | Unclear             | Unclear                | Inadequate                             | Inadequate                    | Unclear                 | Unclear             | Adequate      | Inadequate   |
| <b>DeFronzo et al.</b> , 1995 <sup>30</sup>    | Unclear             | Unclear                | Unclear                                | Unclear                       | Unclear                 | Unclear             | Adequate      | Inadequate   |
| <b>Derosa et al.</b> , 2004 <sup>43</sup>      | Unclear             | Unclear                | Inadequate                             | Inadequate                    | Adequate                | Unclear             | Adequate      | Unclear      |
| <b>Hermann et al.</b> , 1991 <sup>31</sup>     | Adequate            | Unclear                | Inadequate                             | Inadequate                    | Unclear                 | Unclear             | Adequate      | Inadequate   |
| <b>Hermann et al.</b> , 1991a <sup>32-35</sup> | Adequate            | Adequate               | Adequate                               | Adequate                      | Adequate                | Adequate            | Inadequate    | Inadequate   |
| <b>Kamel et al.</b> , 1997 <sup>36</sup>       | Unclear             | Unclear                | Unclear                                | Unclear                       | Unclear                 | Unclear             | Adequate      | Unclear      |
| <b>Lawrence et al.</b> , 2004 <sup>37</sup>    | Unclear             | Unclear                | Inadequate                             | Adequate                      | Adequate                | Unclear             | Adequate      | Inadequate   |
| <b>Tang et al.</b> , 2004 <sup>42</sup>        | Unclear             | Unclear                | Inadequate                             | Inadequate                    | Unclear                 | Unclear             | Adequate      | Adequate     |
| <b>Tessier et</b>                              | Unclear             | Unclear                | Inadequate                             | Inadequate                    | Adequate                | Unclear             | Adequate      | Inadequate   |

|                                             |          |          |            |            |          |            |          |            |
|---------------------------------------------|----------|----------|------------|------------|----------|------------|----------|------------|
| <b>al., 1999</b> <sup>38</sup>              |          |          |            |            |          |            |          |            |
| <b>Tosiet al., 2003</b> <sup>39</sup>       | Adequate | Adequate | Adequate   | Adequate   | Unclear  | Adequate   | Adequate | Inadequate |
| <b>UKPDS 34, 1998</b> <sup>2; 40; 41</sup>  | Adequate | Adequate | Inadequate | Adequate   | Unclear  | Inadequate | Adequate | Inadequate |
| <b>Yamanouchiet al., 2005</b> <sup>44</sup> | Adequate | Adequate | Inadequate | Inadequate | Adequate | Unclear    | Adequate | Unclear    |

ADOPT=A Diabetes Outcome Progression Trial; UKPDS=United Kingdom Prospective Diabetes Study

Confidential

## References

- (1) Inzucchi SE, Bergenstal RM, Buse JB, Diamant M, Ferrannini E, Nauck M et al. Management of hyperglycaemia in type 2 diabetes: a patient-centered approach. Position statement of the American Diabetes Association (ADA) and the European Association for the Study of Diabetes (EASD). *Diabetologia* 2012; 55(6):1577-1596.
- (2) UK Prospective Diabetes Study (UKPDS). Effect of intensive blood-glucose control with metformin on complications in overweight patients with type 2 diabetes (UKPDS 34). *Lancet* 1998; 352(9131):854-865.
- (3) Roumie CL, Hung AM, Greevy RA, Grijalva CG, Liu X, urff HJ et al. Comparative effectiveness of sulfonylurea and metformin monotherapy on cardiovascular events in type 2 diabetes mellitus: a cohort study. *Ann Intern Med* 2012; 157(9):601-10.
- (4) Schramm TK, Gislason GH, Vaag A, Rasmussen JN, Folke F, Hansen ML et al. Mortality and cardiovascular risk associated with different insulin secretagogues compared with metformin in type 2 diabetes, with or without a previous myocardial infarction: a nationwide study. *European Heart Journal* 2011; 32(15):1900-1908.
- (5) Pantalone KM, Kattan MW, Yu C, Wells BJ, Arrigain S, Jain A et al. Increase in overall mortality risk in patients with type 2 diabetes receiving glipizide, glyburide or glimepiride monotherapy versus metformin: a retrospective analysis. *Diabetes, Obesity & Metabolism* 2012; 14:803-09.
- (6) Henquin JC. The fiftieth anniversary of hypoglycaemic sulphonamides. How did the mother compound work? *Diabetologia* 1992; 35(10):907-912.
- (7) Markkanen A, Oka M, Petola P. Carbutamide in diabetes: report of a long-term trial, with special reference to late failures. *BMJ* 1960; 1(5179):1089-1091.
- (8) Nathan DM, Buse JB, Davidson MB, Ferrannini E, Holman RR, Sherwin R et al. Medical management of hyperglycaemia in type 2 diabetes mellitus: a consensus algorithm for the initiation and adjustment of therapy : A consensus statement from the American Diabetes Association and the European Association for the Study of Diabetes. *Diabetologia* 2009; 52(1):17-30.
- (9) Higgins JPT, Green S. *Cochrane Handbook for Systematic Reviews of Interventions* Version 5.0.0 [updated February 2008]. The Cochrane Collaboration, 2008. Available from [www.cochrane-handbook.org](http://www.cochrane-handbook.org).

- 1  
2  
3  
4 (10) Hemmingsen B, Lundstrøm LH, Hemmingsen C, Lund SS,  
5 Wetterslev J, Gluud C et al. Non-incretin insulin  
6 secretagogues for patients with type 2 diabetes mellitus  
7 (Protocol). Cochrane Database of Systematic Reviews 2011;  
8 Issue 2: Art. No.: CD009008. DOI: 10.1002/14651858.CD009008.  
9
- 10 (11) Hemmingsen B, Schroll JB, Lund SS, Wetterslev J, Gluud C,  
11 Vaag A et al. Sulphonylurea monotherapy for patients with  
12 type 2 diabetes mellitus. Cochrane Database of Systematic  
13 Reviews 2013; Issue 4: Art.  
14 No.:CD009008.DOI:10.1002/14651858.CD009008.pub2.  
15
- 16 (12) Review Manager (RevMan) [Computer program]. Version 5.1.  
17 Copenhagen: The Nordic Cochrane Centre, The Cochrane  
18 Collaboration, 2011.  
19
- 20 (13) DerSimonian R, Laird N. Meta-analysis in clinical trials.  
21 Controlled Clinical Trials 1986; 7(3):177-188.  
22
- 23 (14) DeMets DL. Methods for combining randomized clinical  
24 trials: strengths and limitations. Statistics in Medicine  
25 1987; 6(3):341-350.  
26
- 27 (15) Brok J, Thorlund K, Wetterslev J, Gluud C. Apparently  
28 conclusive meta-analyses may be inconclusive-Trial sequential  
29 analysis adjustment of random error risk due to repetitive  
30 testing of accumulating data in apparently conclusive  
31 neonatal meta-analyses. International Journal of Epidemiology  
32 2009; 38(1):287-298.
- 33 (16) Thorlund K, Engstrøm J, Wetterslev J, Brok J, Imberger G,  
34 Gluud C. User manual for Trial Sequential Analysis (TSA).  
35 <http://www.ctu.dk/tsa/downloads.aspx>  
36
- 37 (17) Wetterslev J, Thorlund K, Brok J, Gluud C. Trial  
38 sequential analysis may establish when firm evidence is  
39 reached in cumulative meta-analysis. Journal of Clinical  
40 Epidemiology 2008; 61(1):64-75.  
41
- 42 (18) Wetterslev J, Thorlund K, Brok J, Gluud C. Estimating  
43 required information size by quantifying diversity in random-  
44 effects meta-analyses. BMC Medical Research Methodology 2009;  
45 9(86):1-12.  
46
- 47 (19) Pogue J, Yusuf S. Overcoming the limitations of current  
48 meta-analysis of randomised controlled trials. Lancet 1998;  
49 351(9095):47-52.  
50
- 51 (20) Trial sequential analysis [Computer program]. Version  
52 0.9. Copenhagen: Copenhagen Trial Unit, 2011.  
53
- 54 (21) GlaxoSmithKline. Diabetes Study With Rosiglitazone  
55 Monotherapy Versus Metformin Or Glyburide/Glibenclamide.  
56 ClinicalTrials.gov  
57  
58  
59  
60



- 1  
2  
3  
4 (22) Home PD, Kahn SE, Jones NP, Noronha D, Beck-Nielsen H,  
5 Viberti G et al. Experience of malignancies with oral  
6 glucose-lowering drugs in the randomised controlled ADOPT (A  
7 Diabetes Outcome Progression Trial) and RECORD (Rosiglitazone  
8 Evaluated for Cardiovascular Outcomes and Regulation of  
9 Glycaemia in Diabetes) clinical trials. *Diabetologia* 2010;  
10 53(9):1838-1845.
- 11 (23) Kahn SE, Haffner SM, Heise MA, Herman WH, Holman RR,  
12 Jones NP et al. Glycemic durability of rosiglitazone,  
13 metformin, or glyburide monotherapy. [Erratum appears in *N*  
14 *Engl J Med.* 2007 Mar 29;356(13):1387-8]. *New England Journal*  
15 *of Medicine* 2006; 355(23):2427-2443.
- 16  
17 (24) Krall RL. Cardiovascular safety of rosiglitazone. *The*  
18 *Lancet* 2007; 369(9578):1995-1996.
- 19  
20 (25) Lachin JM, Viberti G, Zinman B, Haffner SM, Aftring RP,  
21 Paul G et al. Renal function in type 2 diabetes with  
22 rosiglitazone, metformin, and glyburide monotherapy. *Clinical*  
23 *Journal of the American Society of Nephrology* 2011;  
24 6(5):1032-1040.
- 25  
26 (26) Viberti G, Kahn SE, Greene DA, Herman WH, Zinman B,  
27 Holman RR et al. A diabetes outcome progression trial  
28 (ADOPT): an international multicenter study of the  
29 comparative efficacy of rosiglitazone, glyburide, and  
30 metformin in recently diagnosed type 2 diabetes. *Diabetes*  
31 *Care* 2002; 25(10):1737-1743.
- 32  
33 (27) Viberti G, Lachin J, Holman R, Zinman B, Haffner S,  
34 Kravitz B et al. A Diabetes Outcome Progression Trial  
35 (ADOPT): baseline characteristics of Type 2 diabetic patients  
36 in North America and Europe. *Diabetic Medicine* 2006;  
37 23(12):1289-1294.
- 38  
39 (28) Campbell IW, Menzies DG, Chalmers J, McBain AM, Brown IRF.  
40 One year comparative trial of metformin and glipizide in type  
41 2 diabetes mellitus. *Diabète & Métabolisme* 1994; 20(4):394-  
42 400.
- 43  
44 (29) Collier A, Watson HH, Patrick AW, Ludlam CA, Clarke BF.  
45 Effect of glycaemic control, metformin and gliclazide on  
46 platelet density and aggregability in recently diagnosed type  
47 2 (non-insulin-dependent) diabetic patients. *Diabète &*  
48 *Métabolisme* 1989; 15(6):420-425.
- 49  
50 (30) DeFronzo RA, Goodman AM, and the Multicenter Metformin  
51 Study. Efficacy of metformin in patients with non-insulin-  
52 dependent diabetes mellitus. *New England Journal of Medicine*  
53 1995; 333(9):541-549.
- 54  
55 (31) Hermann LS, Karlsson JE, Sjöstrand A. Prospective  
56 comparative study in NIDDM patients of metformin and  
57 glibenclamide with special reference to lipid profiles.
- 58  
59  
60

- 1  
2  
3  
4 European Journal of Clinical Pharmacology 1991; 41(3):263-  
5 265.  
6  
7 (32) Hermann LS, Bitzén PO, Kjellström T, Lindgärde F,  
8 Scherstén B. Comparative efficacy of metformin and  
9 glibenclamide in patients with non-insulin-dependent diabetes  
10 mellitus. *Diabète & Métabolisme* 1991; 17:201-208.  
11  
12 (33) Hermann LS, Kjellström T, Nilsson-Ehle P. Effects of  
13 metformin and glibenclamide alone and in combination on serum  
14 lipids and lipoproteins in patients with non-insulin-  
15 dependent diabetes mellitus. *Diabète & Métabolisme* 1991;  
16 17:174-179.  
17  
18 (34) Hermann LS, Scherstén B, Melander A. Antihyperglycaemic  
19 efficacy, response prediction and dose-response relations of  
20 treatment with metformin and sulphonylurea, alone and in  
21 primary combination. *Diabetic Medicine* 1994; 11(10):953-960.  
22  
23 (35) Hermann LS, Scherstén B, Bitzén PO, Kjellström T,  
24 Lindgärde F, Melander A. Therapeutic comparison of metformin  
25 and sulphonylurea, alone and in various combinations. A  
26 double-blind controlled study. *Diabetes Care* 1994;  
27 17(10):1100-1109.  
28  
29 (36) Kamel AN, Cetinarslan B, Uysal AR, Baskal N, Corapcioglu  
30 D, Tonyukuk V. Efficacy of Monotherapy With Acarbose,  
31 Glibenclamide, Gliclazide, Metformin or Placebo in Niddm  
32 Patients. *Diabetologia* 1997; 40(Suppl 1):1255.  
33  
34 (37) Lawrence JM, Reid J, Taylor GJ, Stirling C, Reckless JP.  
35 Favorable effects of pioglitazone and metformin compared with  
36 gliclazide on lipoprotein subfractions in overweight patients  
37 with early type 2 diabetes. *Diabetes Care* 2004; 27(1):41-46.  
38  
39 (38) Tessier D, Maheux P, Khalil A, Fülöp T. Effects of  
40 gliclazide versus metformin on the clinical profile and lipid  
41 peroxidation markers in type 2 diabetes. *Metabolism: Clinical  
42 and Experimental* 1999; 48(7):897-903.  
43  
44 (39) Tosi F, Muggeo M, Brun E, Spiazzi G, Perobelli L, Zanolini  
45 E et al. Combination treatment with metformin and  
46 glibenclamide versus single-drug therapies in type 2 diabetes  
47 mellitus: a randomized, double-blind, comparative study.  
48 *Metabolism: Clinical and Experimental* 2003; 52(7):862-867.  
49  
50 (40) Turner RC, Holman RR, Mathews DR, Oakes SF, Bassett PA,  
51 Stratton IM et al. UK Prospective Diabetes Study (UKPDS).  
52 VIII. Study design, progress and performance. *Diabetologia*  
53 1991; 34(12):877-890.  
54  
55 (41) UK Prospective Diabetes Study (UKPDS). United Kingdom  
56 Prospective Diabetes Study (UKPDS) 13: Relative efficacy of  
57 randomly allocated diet, sulphonylurea, insulin, or metformin  
58 in patients with newly diagnosed non-insulin dependent  
59  
60

- 1  
2  
3  
4 diabetes followed for three years. *BMJ* 1995;(0959-8138  
5 (Print)).
- 6  
7 (42) Tang JZ, Mao JP, Yang ZF, Zhou ZG, Tang WL, Feng Q.  
8 Effects of glimepiride and metformin on free fatty acid in  
9 patients with Type 2 diabetes mellitus. *Zhong nan da xue xue*  
10 *bao* 2004; *Yi xue ban* = Journal of Central South University.  
11 *Medical Sciences*. 29(6):631-634.
- 12  
13 (43) Derosa G, Franzetti I, Gadaleta G, Ciccarelli L, Fogari  
14 R. Metabolic variations with oral antidiabetic drugs in  
15 patients with Type 2 diabetes: comparison between glimepiride  
16 and metformin. *Diabetes, Nutrition & Metabolism* 2004;  
17 17(3):143-50.
- 18  
19 (44) Yamanouchi T, Sakai T, Igarashi K, Ichiyanagi K, Watanabe  
20 H, Kawasaki T. Comparison of metabolic effects of  
21 pioglitazone, metformin, and glimepiride over 1 year in  
22 Japanese patients with newly diagnosed Type 2 diabetes.  
23 *Diabetic Medicine* 2005; 22(8):980-985.
- 24  
25 (45) Wood L, Egger M, Gluud LL, Schulz KF, Jã¼ni P, Altman GD  
26 et al. Empirical evidence of bias in treatment effect  
27 estimates in controlled trials with different interventions  
28 and outcomes: meta-epidemiological study. *BMJ (Clinical*  
29 *Research Ed)* 2008; 336:601-605.
- 30  
31 (46) Savovic J, Jones HE, Altman DG, Harris RJ, Juni P, Pildal  
32 JF et al. Influence of reported study design characteristics  
33 on intervention effect estimates from randomized, controlled  
34 trials. *Ann Intern Med* 2012; 157:429-38.
- 35  
36 (47) Savovic J, Jones H, Altman D, Harris R, Juni P, Pildal J  
37 et al. Influence of reported study design characteristics on  
38 intervention effect estimates from randomised controlled  
39 trials: combined analysis of meta-epidemiological studies.  
40 *Health Technol Assess* 2012; 16(35):1-82.
- 41  
42 (48) Thorlund K, Imberger G, Walsh M, Chu R, Gluud C,  
43 Wetterslev J et al. The number of patients and events  
44 required to limit the risk of overestimation of intervention  
45 effects in meta-analysis—a simulation study. *PLoS ONE* 2011;  
46 6(10):e25491.
- 47  
48 (49) Thorlund K, Devereaux PJ, Wetterslev J, Guyatt G,  
49 Ioannidis JP, Thabane L et al. Can trial sequential  
50 monitoring boundaries reduce spurious inferences from meta-  
51 analyses? *International Journal of Epidemiology* 2009;  
52 38(1):276-286.
- 53  
54 (50) Saenz A, Fernandez-Esteban I, Mataix A, Ausejo M, Roque  
55 M, Moher D. Metformin monotherapy for type 2 diabetes  
56 mellitus. *Cochrane Database of Systematic Reviews (Online)*  
57 2005; Issue 3: Art. No.: CD002966. DOI:  
58 10.1002/14651858.CD002966.pub3.  
59  
60

- 1  
2  
3  
4 (51) Hong J, Zhang Y, Lai S, Lv A, Su Q, Dong Y et al. Effects  
5 of Metformin Versus Glipizide on Cardiovascular Outcomes in  
6 Patients With Type 2 Diabetes and Coronary Artery Disease.  
7 Diabetes Care 2012;(1935-5548 (Electronic)).  
8
- 9 (52) American Association of Clinical Endocrinologists/  
10 American College of Endocrinology. Statement by an american  
11 association of clinical endocrinologists/american college of  
12 endocrinology consensus panel on type 2 diabetes mellitus: an  
13 algorithm for glycemic control. Endocr Pract 2011; 15(No.  
14 6):540-49.  
15
- 16 (53) Garber AJ, Abrahamson MJ, Barzilay JI, Blonde L,  
17 Bloomgarden ZT, Bush MA et al. AACE comprehensive diabetes  
18 management algorithm 2013. Endocr Pract 2013; 19(2):327-36.  
19
- 20 (54) Alexander GC, Sehgal NL, Moloney RM, Stafford RS.  
21 National trends in treatment of type 2 diabetes mellitus,  
22 1994-2007. Arch Intern Med 2008; 168(19):2088-94.  
23  
24  
25  
26  
27  
28  
29  
30  
31  
32  
33  
34  
35  
36  
37  
38  
39  
40  
41  
42  
43  
44  
45  
46  
47  
48  
49  
50  
51  
52  
53  
54  
55  
56  
57  
58  
59  
60

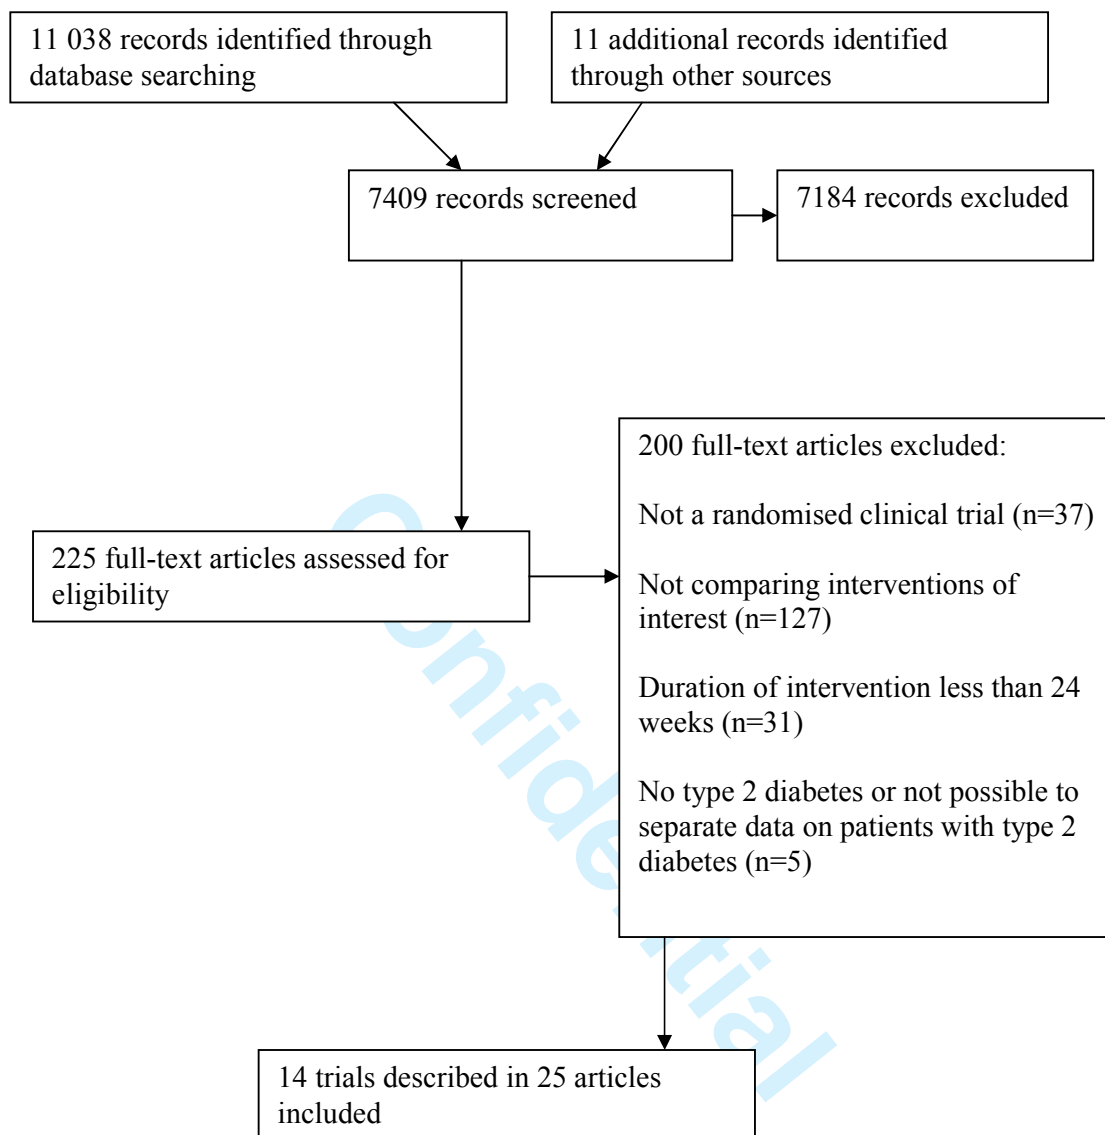

1  
2  
3  
4  
5  
6  
7  
8  
9  
10  
11  
12  
13  
14  
15  
16  
17  
18  
19  
20  
21  
22  
23  
24  
25  
26  
27  
28  
29  
30  
31  
32  
33  
34  
35  
36  
37  
38  
39  
40  
41  
42  
43  
44  
45  
46  
47  
48  
49  
50  
51  
52  
53  
54  
55  
56  
57  
58  
59  
60

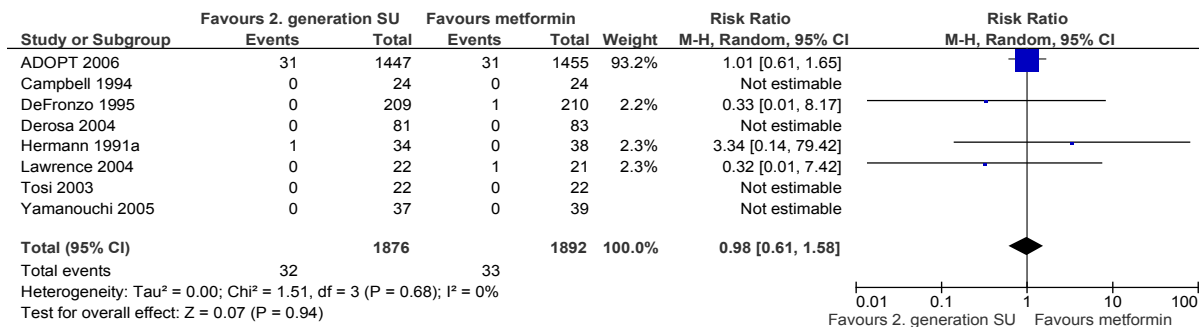

Fig 2a. Forest plot for all-cause mortality

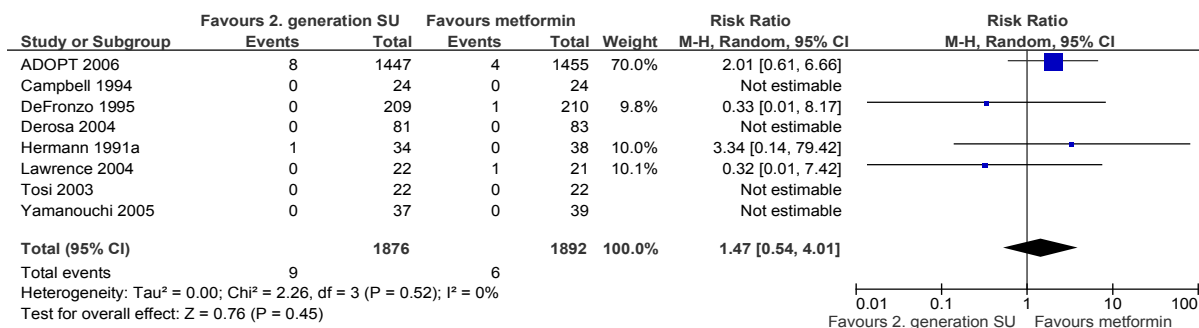

Fig 2b. Forest plot for cardiovascular mortality

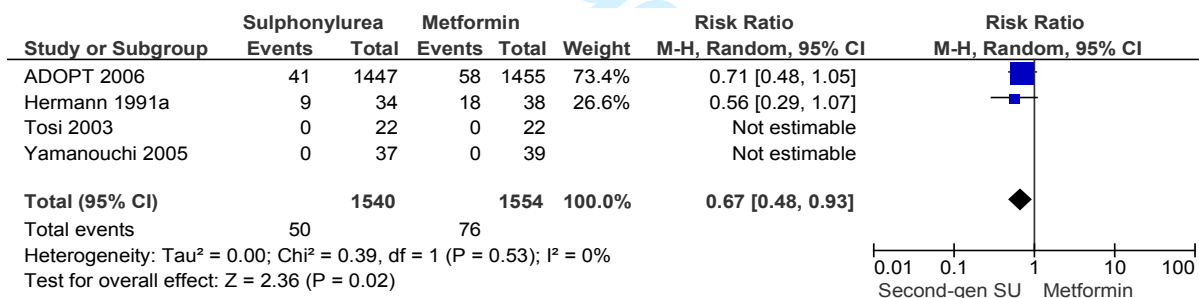

Fig 2c. Forest plot for non-fatal macrovascular outcomes

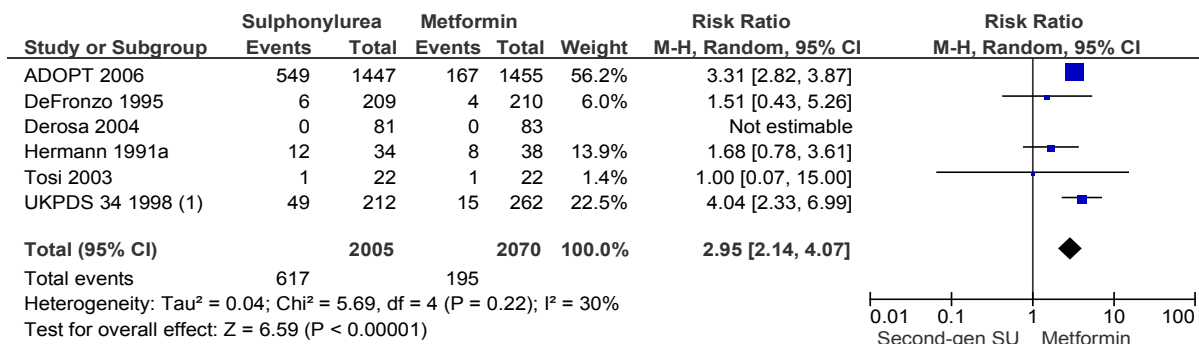

(1) Data after one year of follow-up

Fig 3a. Forest plot for mild hypoglycaemia

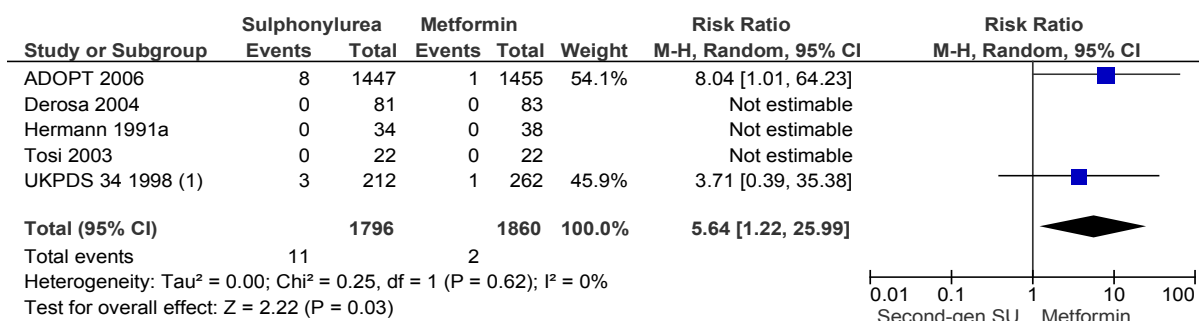

(1) Data after one year of follow-up

Fig 3b. Forest plot for severe hypoglycaemia

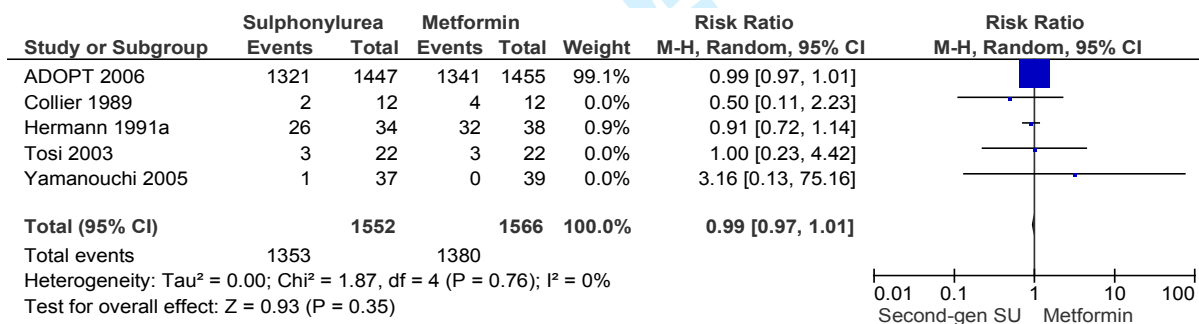

Fig 3c. Forest plot for adverse events

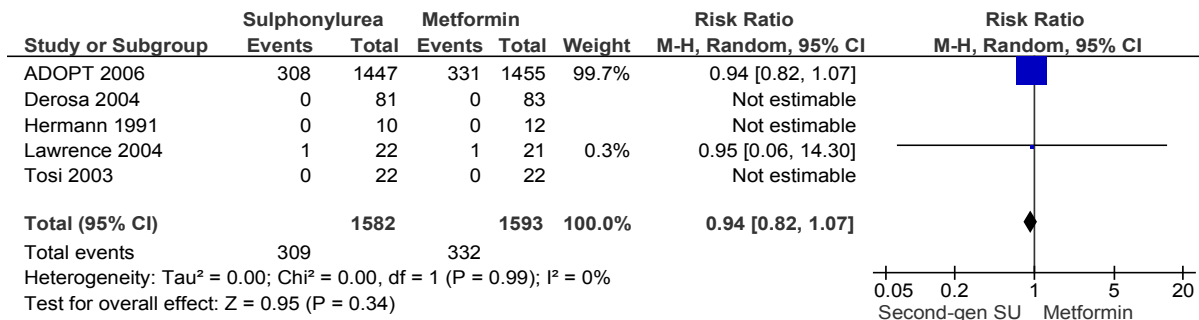

Fig 3d. Forest plot for serious adverse events

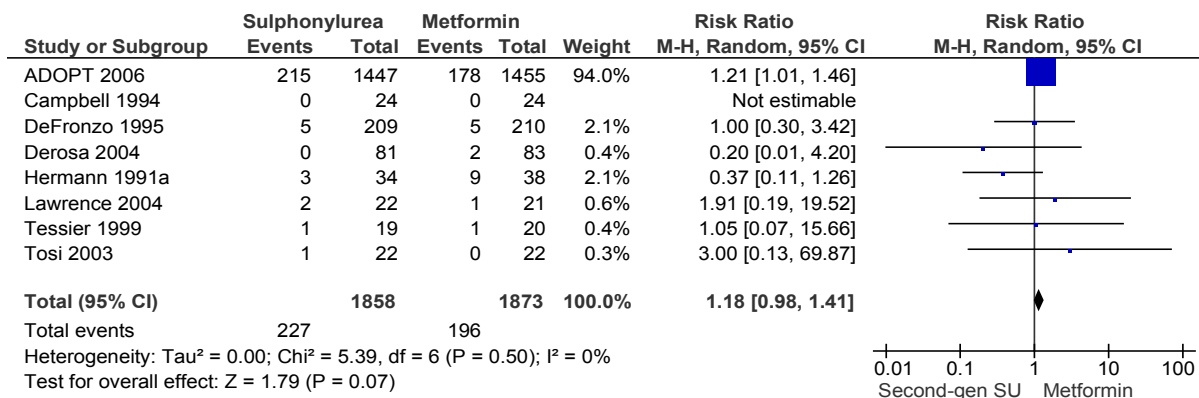

Fig 3e. Forest plot for drop-outs due to adverse events

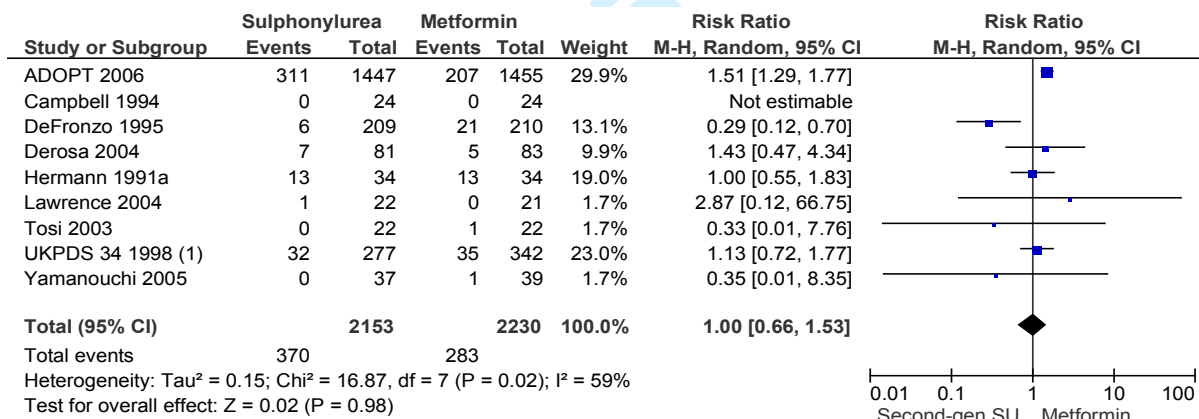

(1) Data after three years of follow-up

Fig 3f. Forest plot for intervention failure



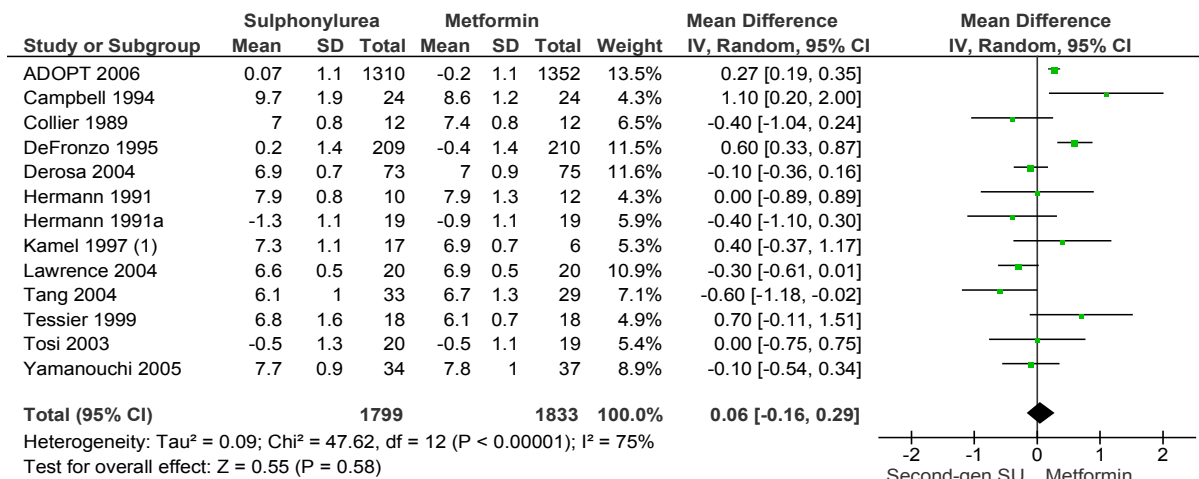

Fig 4a. Forest plot for change in HbA1c from baseline

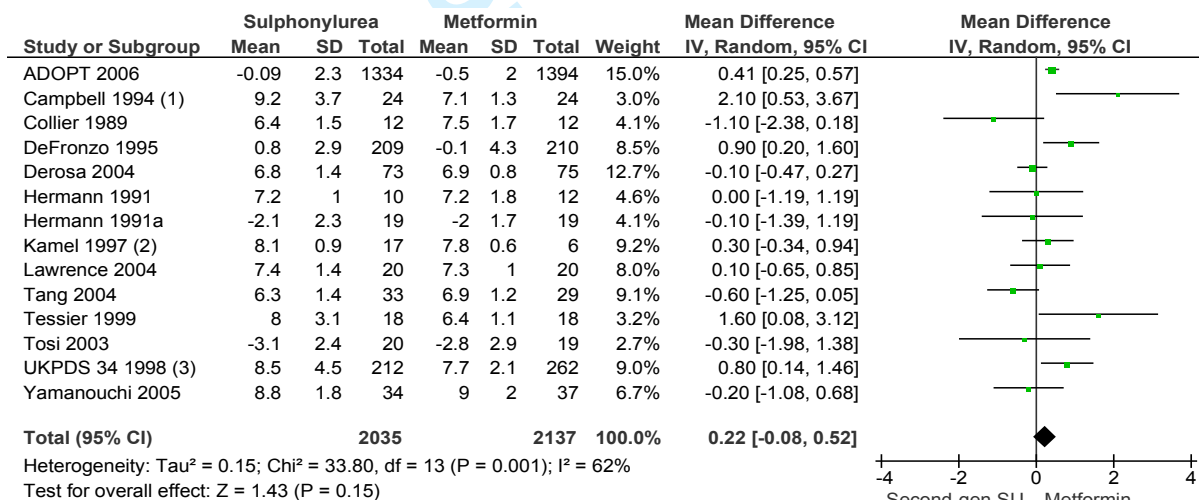

Fig 4b. Forest plot for change in fasting blood glucose from baseline

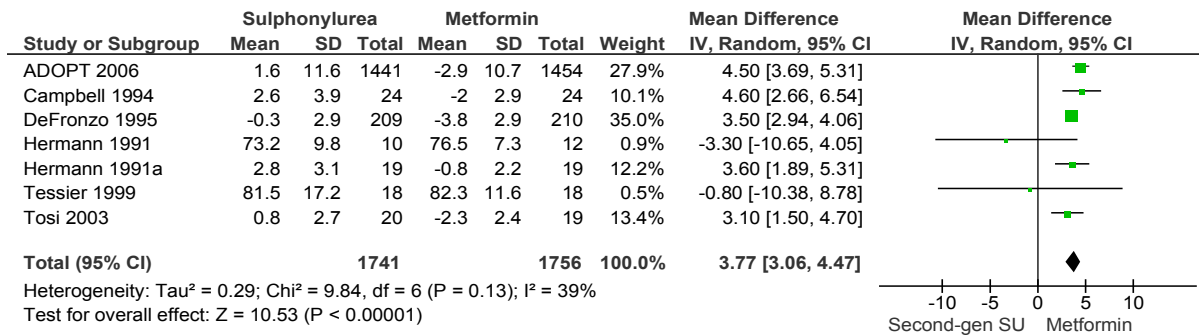

Fig 4c. Forest plot for change in weight from baseline

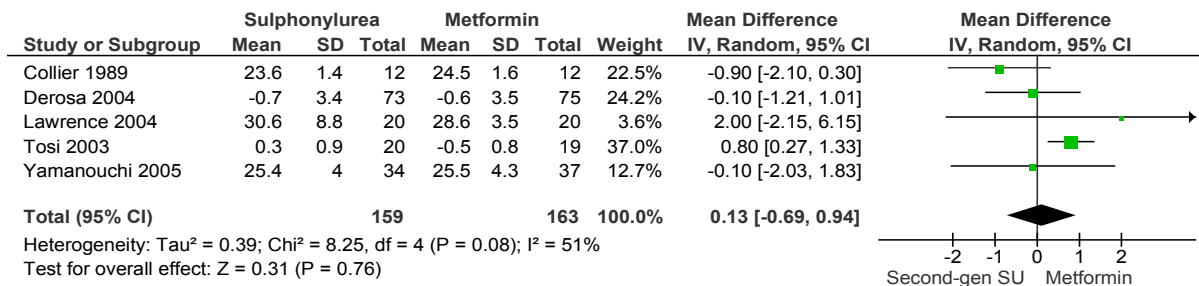

Fig 4d. Forest plot for change in body mass index from baseline

## Web appendix 1. Search strategies

### The Cochrane Library

- #1 MeSH descriptor Diabetes mellitus, type 2 explode all trees  
 #2 MeSH descriptor Insulin resistance explode all trees  
 #3 ( (impaired in All Text and glucose in All Text and toleranc\* in All Text) or (glucose in All Text and intoleranc\* in All Text) or (insulin\* in All Text and resistanc\* in All Text) )  
 #4 (obes\* in All Text near/6 diabet\* in All Text)  
 #5 (MODY in All Text or NIDDM in All Text or TDM2 in All Text)  
 #6 ( (non in All Text and insulin\* in All Text and depend\* in All Text) or (noninsulin\* in All Text and depend\* in All Text) or (non in All Text and insulindepend\* in All Text) or noninsulindepend\* in All Text)  
 #7 (typ\* in All Text and (2 in All Text near/6 diabet\* in All Text) )  
 #8 (typ\* in All Text and (II in All Text near/6 diabet\* in All Text) )  
 #9 (non in All Text and (keto\* in All Text near/6 diabet\* in All Text) )  
 #10 (nonketo\* in All Text near/6 diabet\* in All Text)  
 #11 (adult\* in All Text near/6 diabet\* in All Text)  
 #12 (matur\* in All Text near/6 diabet\* in All Text)  
 #13 (late in All Text near/6 diabet\* in All Text)  
 #14 (slow in All Text near/6 diabet\* in All Text)  
 #15 (stabl\* in All Text near/6 diabet\* in All Text)  
 #16 (insulin\* in All Text and (defic\* in All Text near/6 diabet\* in All Text) )  
 #17 (plurimetabolic in All Text and syndrom\* in All Text)  
 #18 (pluri in All Text and metabolic in All Text and syndrom\* in All Text)  
 #19 (#1 or #2 or #3 or #4 or #5 or #6 or #7 or #8 or #9 or #10)  
 #20 (#11 or #12 or #13 or #14 or #15 or #16 or #17 or #18)  
 #21 (#19 or #20)  
 #22 MeSH descriptor Diabetes insipidus explode all trees  
 #23 (diabet\* in All Text and insipidus in All Text)  
 #24 (#22 or #23)  
 #25 (#21 and not #24)  
 #26 MeSH descriptor Sulfonylurea compounds explode all trees  
 #27 (insulin? in All Text and secretagog\* in All Text)  
 #28 (acetoexamid\* in All Text or carbutamid\* in All Text or chlorpropamid\* in All Text or tolbutamid\* in All Text or tolazamid\* in All Text)  
 #29 (glipizid\* in All Text or gliclazid\* in All Text or glibenclamid\* in All Text or glyburid\* in All Text or gliquidon\* in All Text or glycopyramid\* in All Text)  
 #30 glimepirid\* in All Text  
 #31 (meglitinid\* in All Text or repaglinid\* in All Text or nateglinid\* in All Text)  
 #32 (sulfonylurea\* in All Text or sulphonylurea\* in All Text)  
 #33 (glibenese\* in All Text or minidiab\* in All Text or glucotrol\* in All Text or daonil\* in All Text or euglucon\* in All Text or glynase\* in All Text)  
 #34 (#26 or #27 or #28 or #29 or #30 or #31 or #32 or #33)  
 #35 (#25 and #34)

**MEDLINE**

1. exp Diabetes Mellitus, Type 2/
2. exp Insulin Resistance/
3. exp Glucose Intolerance/
4. (impaired glucos\$ toleranc\$ or glucos\$ intoleranc\$ or insulin resistanc\$).tw,ot.
5. (obes\$ adj3 diabet\$).tw,ot.
6. (MODY or NIDDM or T2DM).tw,ot.
7. (non insulin\$ depend\$ or noninsulin\$ depend\$ or noninsulin?depend\$ or non insulin?depend\$).tw,ot.
8. ((typ? 2 or typ? II or typ?2 or typ?II) adj3 diabet\$).tw,ot.
9. ((keto?resist\$ or non?keto\$) adj6 diabet\$).tw,ot.
10. (((late or adult\$ or matur\$ or slow or stabl\$) adj3 onset) and diabet\$).tw,ot.
11. or/1-10
12. exp Diabetes Insipidus/
13. diabet\$ insipidus.tw,ot.
14. 12 or 13
15. 11 not 14
16. exp Sulfonylurea Compounds/
17. exp Glyburide/
18. insulin? secretagog\$.tw,ot.
19. (acetoexamid\$ or Carbutamid\$ or Chlorpropamid\$ or Tolbutamid\$ or Tolazamid\$).tw,ot.
20. (Glipizid\$ or Gliclazid\$ or Glibenclamid\$ or glyburid\$ or Gliquidon\$ or Glycropyramid\$).tw,ot.
21. glimepirid\$.tw,ot.
22. (meglitinid\$ or repaglinid\$ or nateglinid\$).tw,ot.
23. (sulfonylurea\$ or sulphonylurea\$).tw,ot.
24. (glibenese\$ or minidiab\$ or Glucotrol\$ or daonil\$ or euglucon\$ or Glynase\$).tw,ot.
25. or/16-24
26. 15 and 25
27. randomized controlled trial.pt.
28. controlled clinical trial.pt.
29. randomi?ed.ab.
30. placebo.ab.
31. clinical trials as topic.sh.
32. randomly.ab.
33. trial.ti.
34. or/27-33
35. Meta-analysis.pt.
36. exp Technology Assessment, Biomedical/
37. exp Meta-analysis/
38. exp Meta-analysis as topic/
39. hta.tw,ot.
40. (health technology adj6 assessment\$).tw,ot.
41. (meta analy\$ or metaanaly\$ or meta?analy\$).tw,ot.
42. ((review\$ or search\$) adj10 (literature\$ or medical database\$ or medline or pubmed or embase or cochrane or cinahl or psycinfo or psyclit or healthstar or biosis or current content\$ or systemat\$)).tw,ot.
43. or/35-42

44. (comment or editorial or historical-article).pt.
45. 43 not 44
46. 34 or 45
47. 26 and 46
48. (animals not (animals and humans)).sh.
49. 47 not 48

#### EMBASE

1. exp Diabetes Mellitus, Type 2/
2. exp Insulin Resistance/
3. (MODY or NIDDM or T2D or T2DM).tw,ot.
4. ((typ? 2 or typ? II or typ?II or typ?2) adj3 diabet\*).tw,ot.
5. (obes\* adj3 diabet\*).tw,ot.
6. (non insulin\* depend\* or non insulin?depend\* or noninsulin\* depend\* or noninsulin?depend\*).tw,ot.
7. ((keto?resist\* or non?keto\*) adj3 diabet\*).tw,ot.
8. ((adult\* or matur\* or late or slow or stabl\*) adj3 diabet\*).tw,ot.
9. (insulin\* defic\* adj3 relativ\*).tw,ot.
10. insulin\* resistanc\*.tw,ot.
11. or/1-10
12. exp Diabetes Insipidus/
13. diabet\* insipidus.tw,ot.
14. 12 or 13
15. 11 not 14
16. exp sulfonylurea derivative/
17. insulin? secretagog\*.tw,ot.
18. exp acetohexamide/
19. exp carbutamide/
20. exp chlorpropamide/
21. exp tolbutamide/
22. exp tolazamide/
23. (acetohexamid\* or carbutamid\* or chlorpropamid\* or tolbutamid\* or tolazamid\*).tw,ot.
24. exp glipizide plus metformin/ or exp glipizide/ or exp glibenclamide/
25. exp gliclazide/
26. exp gliquidone/
27. (glipizid\* or gliclazid\* or glibenclamid\* or glyburid\* or gliquidon\* or glyclopyramid\*).tw,ot.
28. exp glimepiride/
29. glimepirid\*.tw,ot.
30. exp meglitinide/
31. exp repaglinide/
32. exp nateglinide/
33. (meglitinid\* or repaglinid\* or nateglinid\*).tw,ot.
34. (sulfonylurea\* or sulphonylurea\*).tw,ot.
35. (glibenese\* or minidiab\* or glucotrol\* or daonil\* or euglucon\* or glynase\*).tw,ot.
36. or/16-35
37. 15 and 36

- 1  
2  
3  
4 38. exp Randomized Controlled Trial/  
5 39. exp Controlled Clinical Trial/  
6 40. exp Clinical Trial/  
7 41. exp Comparative Study/  
8 42. exp Drug comparison/  
9 43. exp Randomization/  
10 44. exp Crossover procedure/  
11 45. exp Double blind procedure/  
12 46. exp Single blind procedure/  
13 47. exp Placebo/  
14 48. exp Prospective Study/  
15 49. ((clinical or control\$ or comparativ\$ or placebo\$ or prospectiv\$ or randomi?ed) adj3 (trial\$ or  
16 stud\$)).ab,ti.  
17 50. (random\$ adj6 (allocat\$ or assign\$ or basis or order\$)).ab,ti.  
18 51. ((singl\$ or doubl\$ or trebl\$ or tripl\$) adj6 (blind\$ or mask\$)).ab,ti.  
19 52. (cross over or crossover).ab,ti.  
20 53. or/38-52  
21 54. exp meta analysis/  
22 55. (metaanaly\$ or meta analy\$ or meta?analy\$).ab,ti,ot.  
23 56. ((review\$ or search\$) adj10 (literature\$ or medical database\$ or medline or pubmed or embase  
24 or cochrane or cinahl or psycinfo or psyclit or healthstar or biosis or current content\$ or  
25 systematic\$)).ab,ti,ot.  
26 57. exp Literature/  
27 58. exp Biomedical Technology Assessment/  
28 59. hta.tw,ot.  
29 60. (health technology adj6 assessment\$).tw,ot.  
30 61. or/54-60  
31 62. 53 or 61  
32 63. 37 and 62  
33 64. (comment or editorial or historical-article).pt.  
34 65. 63 not 64  
35  
36  
37  
38  
39  
40  
41

**LILACS**

(sulfonylurea OR sulphonylurea) [Words] and diabetes [Words] and not insipidus [Words]

**Science Citation Index Expanded**

- 42  
43  
44  
45  
46  
47  
48 # 1 TS=((impaired glucose toleranc\*) or (glucose intoleranc\*) or (insulin\* resistanc\*))  
49 # 2 TS=(obes\* SAME diabet\*)  
50 # 3 TS=(mody OR NIDDM OR TDM2)  
51 # 4 TS=((non insulin\* depend\*) or (noninsulin\* depend\*) or (non insulindepend\*)  
52 or (noninsulindepend\*))  
53 # 5 TS=(typ\* AND (2 SAME diabet\*))  
54 # 6 TS=(typ\* AND (II SAME diabet\*))  
55 # 7 TS=(non AND (keto\* SAME diabet\*))  
56  
57  
58  
59  
60

1  
 2  
 3  
 4 # 8 TS=(nonketo\* SAME diabet\* )  
 5 # 9 TS=(adult\* SAME diabet\*)  
 6 # 10 TS=(matur\* SAME diabet\*)  
 7 # 11 TS=(late SAME diabet\*)  
 8 # 12 TS=(slow SAME diabet\*)  
 9 # 13 TS=(stabl\* SAME diabet\*)  
 10 # 14 TS=(insulin and (defic\* SAME diabet\*))  
 11 # 15 TS=(plurimetabolic syndrom\*)  
 12 # 16 TS=(pluri metabolic syndrom\*)  
 13 # 17 #16 OR #15 OR #14 OR #13 OR #12 OR #11 OR #10 OR #9 OR #8 OR #7 OR #6 OR #5  
 14 OR #4 OR #3 OR #2 OR #1  
 15 # 18 TS=(diabet\* insipidus)  
 16 # 19 #17 NOT #18  
 17 # 20 TS=(insulin\* secretagog\*)  
 18 # 21 TS=(acetoexamid\* or carbutamid\* or chlorpropamid\* or tolbutamid\* or tolazamid\*)  
 19 # 22 TS=(glipizid\* or gliclazid\* or glibenclamid\* or glyburid\* or gliquidon\* or glyclopyramid\*)  
 20 # 23 TS=(glimepirid\*)  
 21 # 24 TS=(sulfonylurea\* or sulphonylurea\*)  
 22 # 25 TS=(glibenese\* or minidiab\* or glucotrol\* or daonil\* or euglucon\* or glynase\*)  
 23 # 26 #25 OR #24 OR #23 OR #22 OR #21 OR #20  
 24 # 27 #26 AND #19  
 25 # 28 TS=((random\* OR controlled OR clinical) AND trial\*) OR placebo\* OR meta-analysis)  
 26 # 29 #28 AND #27  
 27  
 28  
 29  
 30  
 31  
 32

### CINHAL (Ovid SP)

33 S1 (MM "Diabetes Mellitus, Non-Insulin-Dependent")  
 34 S2 (MM "Insulin Resistance")  
 35 S3 (MM "Glucose Intolerance")  
 36 S4 ( impaired glucos\* toleranc\* or glucos\* intoleranc\* or insulin resistanc\* ) or TI ( impaired  
 37 glucos\* toleranc\* or glucos\* intoleranc\* or insulin resistanc\* )  
 38 S5 TX obes\* N3 diabet\* or TI obes\* N3 diabet\*  
 39 S6 TX ( MODY or NIDDM or T2DM ) or TI ( MODY or NIDDM or T2DM )  
 40 S7 TX ( non insulin\* depend\* or noninsulin\* depend\* or noninsulin?depend\* or non  
 41 insulin?depend\* ) or TI ( non insulin\* depend\* or noninsulin\* depend\* or noninsulin?depend\* or  
 42 non insulin?depend\* )  
 43 S8 TX ( (typ? 2 or typ? II or typ?2 or typ?II) AND diabet\* ) or TI ( (typ? 2 or typ? II or typ?2 or  
 44 typ?II) AND diabet\* )  
 45 S9 TX ( (keto?resist\* or non?keto\*) AND diabet\* ) and TI ( (keto?resist\* or non?keto\*) AND  
 46 diabet\* )  
 47 S10 TX ( (late or adult\* or matur\* or slow or stabl\*) AND onset AND diabet\* ) or TI ( (late or  
 48 adult\* or matur\* or slow or stabl\*) AND onset AND diabet\* )  
 49 S11 S1 or S2 or S3 or S4 or S5 or S6 or S7 or S8 or S9 or S10  
 50 S12 (MM "Diabetes Insipidus")  
 51 S13 TX diabet\* insipidus or TI diabet\* insipidus  
 52 S14 S12 or S13  
 53 S15 S11 NOT S14  
 54  
 55  
 56  
 57  
 58  
 59  
 60

- 1
- 2
- 3
- 4 S16 (MM "Sulfonylurea Compounds")
- 5 S17 (MM "Glyburide")
- 6 S18 TX insulin\* secretagog\* or TI insulin\* secretagog\*
- 7 S19 TX ( acetohexamid\* or Carbutamid\* or Chlorpropamid\* or Tolbutamid\* or Tolazamid\* ) or
- 8 TI ( acetohexamid\* or Carbutamid\* or Chlorpropamid\* or Tolbutamid\* or Tolazamid\* )
- 9 S20 TX ( Glipizid\* or Gliclazid\* or Glibenclamid\* or glyburid\* or Gliquidon\* or
- 10 Glyclopamid\*) and TI ( Glipizid\* or Gliclazid\* or Glibenclamid\* or glyburid\* or Gliquidon\* or
- 11 Glyclopamid\* )
- 12 S21 TX glimepirid\* or TI glimepirid\*
- 13 S22 TX ( meglitinid\* or repaglinid\* or nateglinid\* ) or TI ( meglitinid\* or repaglinid\* or
- 14 nateglinid\* )
- 15 S23 TX ( sulfonylurea\* or sulphonylurea\* ) or TI ( sulfonylurea\* or sulphonylurea\* )
- 16 S24 TX ( glibenese\* or minidiab\* or Glucotrol\* or daonil\* or euglucon\* or glynase\* ) or TI (
- 17 glibenese\* or minidiab\* or Glucotrol\* or daonil\* or euglucon\* or glynase\* )
- 18 S25 S16 or S17 or S18 or S19 or S20 or S21 or S22 or S23 or S24
- 19 S26 S15 and S25
- 20 S27 TX ( random\* OR blind\* OR placebo\* OR group\* ) or TI ( random\* OR blind\* OR placebo\*
- 21 OR group\* )
- 22 S28 S26 and S27
- 23
- 24
- 25
- 26
- 27
- 28
- 29
- 30
- 31
- 32
- 33
- 34
- 35
- 36
- 37
- 38
- 39
- 40
- 41
- 42
- 43
- 44
- 45
- 46
- 47
- 48
- 49
- 50
- 51
- 52
- 53
- 54
- 55
- 56
- 57
- 58
- 59
- 60



## Web appendix 2. Description of bias assessment

Risk of bias components based on the Cochrane risk of bias tool classification

### Sequence generation

- Low risk of bias, if the allocation sequence is generated by a computer or random number table or similar
- Uncertain risk of bias, if the trial is described as randomized, but the method used for the allocation sequence generation was not described
- High risk of bias, if a system involving dates, names, or admittance numbers is used for the allocation of patients (quasi-randomized). Such studies were excluded.

### Allocation concealment

- Low risk of bias, if the allocation of patients involves a central independent unit, on-site locked computer, or consecutively numbered sealed envelopes
- Uncertain risk of bias, if the trial is described as randomized, but the method used to conceal the allocation is not described
- High risk of bias, if the allocation sequence is known to the investigators who assigned participants or if the study is quasi-randomized. Such studies were excluded.

### Blinding

- Low risk of bias, if the method of blinding is described
- Uncertain risk of bias, if the method of blinding is not described
- High risk of bias, if the participants or investigators are not blinded

### Incomplete data outcomes

- Low risk of bias, if it is clearly described if there are any post-randomization drop-outs or withdrawals and the reason for these drop-outs are described
- Uncertain risk of bias, if it is not clear whether there are any drop-outs or withdrawals or if the reasons for these drop-outs are not clear
- High risk of bias, if the reasons for missing data are likely to be related to true outcomes, 'as-treated' analysis is performed, potentially inappropriate application of simple imputation, potential for patients with missing outcomes to induce clinically relevant bias in effect estimate or effect size

### Selective outcome reporting

- Low risk of bias, if all the pre-defined (primary and secondary) outcomes are mentioned in the trial's protocol or in a design article have been reported in the pre-specified way
- Uncertain risk of bias, if there is insufficient information to assess whether the risk of selective outcome reporting is present
- High risk of bias, if not all the pre-specified outcomes are reported or if the primary outcomes are changed or if some of the important outcomes are incompletely reported

1  
2  
3  
4 **Other Bias**

5  
6 **Academic bias**

- 7  
8  
9  
10  
11  
12  
13  
14  
15
- Low risk of bias, if the author of the trial has not conducted previous trials addressing the same interventions
  - Uncertain risk of bias, if it is not clear if the author has conducted previous trials addressing the same interventions
  - High risk of bias, if the author of the trial has conducted previous trials addressing the same interventions

16  
17 **Sponsor bias**

- 18  
19  
20  
21  
22  
23  
24  
25  
26  
27  
28  
29  
30  
31  
32  
33  
34  
35  
36  
37  
38  
39  
40  
41  
42  
43  
44  
45  
46  
47  
48  
49  
50  
51  
52  
53  
54  
55  
56  
57  
58  
59  
60
- Low risk of bias, if the trial is unfunded or is not funded by an instrument or equipment or drug manufacturer
  - Uncertain risk of bias, if the source of funding is not clear
  - High risk of bias, if the trial is funded by an instrument or equipment or drug manufacturer

Confidential

## Web appendix 3. Excluded studies

| Study                                                                                                                                                                          | Reason for exclusion                                        |
|--------------------------------------------------------------------------------------------------------------------------------------------------------------------------------|-------------------------------------------------------------|
| Abbatecola et al 2006 <sup>1</sup>                                                                                                                                             | Not comparing intervention of interest*                     |
| Adetuyibi et al 1977 <sup>2</sup>                                                                                                                                              | Duration of intervention less than 24 weeks                 |
| Adlung et al 1974 <sup>3</sup>                                                                                                                                                 | Not a randomized clinical trial                             |
| Ahuja et al 1973 <sup>4</sup>                                                                                                                                                  | Not a randomized clinical trial                             |
| Akanuma et al 1988 <sup>5</sup>                                                                                                                                                | Not comparing interventions of interest                     |
| Almer 1984 <sup>6</sup>                                                                                                                                                        | Not a randomized clinical trial                             |
| Alvarsson et al 2010 <sup>7-9</sup>                                                                                                                                            | Not comparing intervention of interest*                     |
| Aman et al 1977 <sup>10</sup>                                                                                                                                                  | Not a randomized clinical trial                             |
| Assessment on the Prevention of Progression by Rosiglitazone on Atherosclerosis in Type 2 Diabetes Patients with Cardiovascular History (APPROACH) trial 2010 <sup>11-13</sup> | Not comparing intervention of interest*                     |
| Baba et al 1983 <sup>14</sup>                                                                                                                                                  | Not comparing intervention of interest                      |
| Balabolkin et al 1983 <sup>15</sup>                                                                                                                                            | Not a randomized clinical trial                             |
| Balabolkin et al 1988 <sup>16</sup>                                                                                                                                            | Not a randomized clinical trial                             |
| Banerji et al 1995 <sup>17</sup>                                                                                                                                               | Not including participants with type 2 diabetes             |
| Bypass Angioplasty Revascularization Investigation 2 Diabetes (BARI 2D) trial <sup>18</sup>                                                                                    | Not comparing interventions of interest.                    |
| Bellomo et al 2011 <sup>19</sup>                                                                                                                                               | Duration of intervention less than 24 weeks                 |
| Belovalova et al 1990 <sup>20</sup>                                                                                                                                            | Not a randomized clinical trial                             |
| Ben et al 1988 <sup>21</sup>                                                                                                                                                   | Not a randomized clinical trial                             |
| Berber et al 1982 <sup>22</sup>                                                                                                                                                | Duration of intervention less than 24 weeks                 |
| Bernas et al 1992 <sup>23</sup>                                                                                                                                                | Not a randomized clinical trial                             |
| Berry et al 1981 <sup>24</sup>                                                                                                                                                 | Not a randomized clinical trial                             |
| Birkeland et al 1994 <sup>25</sup>                                                                                                                                             | Not comparing intervention of interest*                     |
| Birkeland et al 2002 <sup>26-28</sup>                                                                                                                                          | Not comparing intervention of interest*                     |
| Blumenbach et al 1976 <sup>29</sup>                                                                                                                                            | Not a randomized clinical trial                             |
| Bruns et al 1990 <sup>30</sup>                                                                                                                                                 | Duration of intervention less than 24 weeks                 |
| Calvagno et al 1983 <sup>31</sup>                                                                                                                                              | Not a randomized clinical trial                             |
| Cefalu et al 1998 <sup>32</sup>                                                                                                                                                | Duration of intervention less than 24 weeks                 |
| Ceriello et al 2005 <sup>33</sup>                                                                                                                                              | Not a randomized clinical trial                             |
| Chan et al 1982 <sup>34</sup>                                                                                                                                                  | Not comparing intervention of interest                      |
| Chandra et al 2008 <sup>35</sup>                                                                                                                                               | Not a randomized clinical trial. Authors asked and replied. |
| Charbonnel et al 2005 <sup>36;37</sup>                                                                                                                                         | Not comparing intervention of interest*                     |
| Chen et al 1987 <sup>38</sup>                                                                                                                                                  | Not a randomized clinical trial                             |
| Coniff et al 1983 <sup>39</sup>                                                                                                                                                | Not comparing intervention of interest*                     |
| Cortinovis et al 1998 <sup>40</sup>                                                                                                                                            | Not a randomized clinical trial                             |
| Dalzell et al 1986 <sup>41</sup>                                                                                                                                               | Not comparing intervention of interest*                     |
| Deng 2003 <sup>42</sup>                                                                                                                                                        | Not comparing intervention of interest*                     |
| Derosa et al 2003 <sup>43</sup>                                                                                                                                                | Not comparing intervention of interest*                     |
| Derosa et al 2010 <sup>44</sup>                                                                                                                                                | Not comparing intervention of interest                      |
| Diehl et al 1985 <sup>45</sup>                                                                                                                                                 | Not comparing intervention of interest*                     |
| Dills et al 1996 <sup>46</sup>                                                                                                                                                 | Not comparing intervention of interest                      |

|    |                                    |                                                                                                     |
|----|------------------------------------|-----------------------------------------------------------------------------------------------------|
| 1  |                                    |                                                                                                     |
| 2  |                                    |                                                                                                     |
| 3  |                                    |                                                                                                     |
| 4  | Dowey et al 1979 <sup>47</sup>     | Not a randomized clinical trial                                                                     |
| 5  | Drouin et al 2000 <sup>48</sup>    | Not comparing intervention of interest                                                              |
| 6  | Drouin et al 2004 <sup>49</sup>    | Not comparing intervention of interest                                                              |
| 7  | Duprey et al 1971 <sup>50</sup>    | Not a randomized clinical trial                                                                     |
| 8  | Ebeling et al 2001 <sup>51</sup>   | Not comparing intervention of interest*                                                             |
| 9  | Engelhardt 1965 <sup>52</sup>      | Includes also participants with normal glucose tolerance                                            |
| 10 | Esposito et al 2004 <sup>53</sup>  | Not comparing intervention of interest*                                                             |
| 11 | Feinböck et al 2003 <sup>54</sup>  | Not comparing intervention of interest*                                                             |
| 12 | Ferner et al 1991 <sup>55</sup>    | Not a randomized clinical trial                                                                     |
| 13 | Fineberg et al 1980 <sup>56</sup>  | Not comparing intervention of interest*                                                             |
| 14 | Foley et al 2009 <sup>57;58</sup>  | Not comparing intervention of interest*                                                             |
| 15 | Forst et al 2003 <sup>59</sup>     | Not comparing intervention of interest*                                                             |
| 16 | Forst et al 2005 <sup>60;61</sup>  | Not comparing intervention of interest*                                                             |
| 17 | Forst et al 2011 <sup>62</sup>     | Not a randomized clinical trial                                                                     |
| 18 | Fuchs 1973 <sup>63</sup>           | Duration of intervention less than 24 weeks in publication. Not comparing intervention of interest* |
| 19 |                                    |                                                                                                     |
| 20 | Garber et al 2002 <sup>64;65</sup> | Duration of intervention less than 24 weeks                                                         |
| 21 | Garber 2003 <sup>66</sup>          | Duration of intervention less than 24 weeks                                                         |
| 22 | Gargiolo et al 2001 <sup>67</sup>  | Not a randomized clinical trial                                                                     |
| 23 | Giles et al 2008 <sup>68</sup>     | Not comparing intervention of interest                                                              |
| 24 | Giles et al 2010 <sup>69</sup>     | Not comparing intervention of interest                                                              |
| 25 | Goldberg et al 1996 <sup>70</sup>  | Duration of intervention less than 24 weeks                                                         |
| 26 | Groop et al 1989 <sup>71</sup>     | Not comparing intervention of interest                                                              |
| 27 | Gudat et al 1998 <sup>72</sup>     | Not a randomized clinical trial                                                                     |
| 28 | Gurling 1970 <sup>73</sup>         | Not a randomized clinical trial                                                                     |
| 29 | Happ et al 1974 <sup>74</sup>      | Duration of intervention less than 24 weeks                                                         |
| 30 | Hanefeld 2007 <sup>75-77</sup>     | Not comparing intervention of interest*                                                             |
| 31 | Harrower 1985 <sup>78</sup>        | Not comparing intervention of interest*                                                             |
| 32 | Haupt et al 1974 <sup>79</sup>     | Not a randomized clinical trial                                                                     |
| 33 | Hoffmann 1990 <sup>80;81</sup>     | Not comparing intervention of interest*                                                             |
| 34 | Hoffmann et al 1994 <sup>82</sup>  | Not comparing intervention of interest*                                                             |
| 35 | Hollander et al 1992 <sup>83</sup> | Not comparing intervention of interest*                                                             |
| 36 | Hollander et al 2001 <sup>84</sup> | Duration of intervention less than 24 weeks                                                         |
| 37 | Howes 2000 <sup>85</sup>           | Not a randomized clinical trial                                                                     |
| 38 | Hristov et al 2002 <sup>86</sup>   | Not a randomized clinical trial                                                                     |
| 39 | Hussain 2007 <sup>87</sup>         | Not comparing intervention of interest                                                              |
| 40 | Inukai et al 2005 <sup>88</sup>    | Not comparing intervention of interest                                                              |
| 41 | Irsigler et al 1979 <sup>89</sup>  | Duration of intervention less than 24 weeks                                                         |
| 42 | Ishizuka et al 1994 <sup>90</sup>  | Not a randomized clinical trial                                                                     |
| 43 | Jackson et al 1969 <sup>91</sup>   | Not a randomized clinical trial                                                                     |
| 44 | Jain et al 2006 <sup>92</sup>      | Not comparing intervention of interest*                                                             |
| 45 | Jerums et al 1987 <sup>93</sup>    | Not comparing intervention of interest                                                              |
| 46 | Jibrán et al 2006 <sup>94</sup>    | Not comparing intervention of interest*                                                             |
| 47 | Johnston et al 1970 <sup>95</sup>  | Duration of intervention less than 24 weeks                                                         |
| 48 | Johnston et al 1997 <sup>96</sup>  | Not comparing intervention of interest*                                                             |
| 49 |                                    |                                                                                                     |
| 50 |                                    |                                                                                                     |
| 51 |                                    |                                                                                                     |
| 52 |                                    |                                                                                                     |
| 53 |                                    |                                                                                                     |
| 54 |                                    |                                                                                                     |
| 55 |                                    |                                                                                                     |
| 56 |                                    |                                                                                                     |
| 57 |                                    |                                                                                                     |
| 58 |                                    |                                                                                                     |
| 59 |                                    |                                                                                                     |
| 60 |                                    |                                                                                                     |

|                                                                                                                           |                                                 |
|---------------------------------------------------------------------------------------------------------------------------|-------------------------------------------------|
| Josephkutty et al 1990 <sup>97</sup>                                                                                      | Duration of intervention less than 24 weeks     |
| Joshi et al 2002 <sup>98</sup>                                                                                            | Duration of intervention less than 24 weeks     |
| Kakhnovskii et al 1993 <sup>99</sup>                                                                                      | Not a randomized clinical trial                 |
| Kaku et al 2011 <sup>100-103</sup>                                                                                        | Not comparing intervention of interest*         |
| Kanda 1998 <sup>104</sup>                                                                                                 | Not comparing intervention of interest*         |
| Kanoun et al 1996 <sup>105</sup>                                                                                          | Not a randomized clinical trial                 |
| Kovacevic et al 1997 <sup>106</sup>                                                                                       | Not comparing intervention of interest*         |
| Langenfeld et al 2005 <sup>107</sup>                                                                                      | Not comparing intervention of interest          |
| Lecomte et al 1977 <sup>108</sup>                                                                                         | Duration of intervention less than 24 weeks     |
| Levy et al 1995 <sup>109</sup>                                                                                            | Duration of intervention less than 24 weeks     |
| Li et al 2009 <sup>110</sup>                                                                                              | Not comparing intervention of interest          |
| Lim et al 1970 <sup>111</sup>                                                                                             | Duration of intervention less than 24 weeks     |
| Lindbjerg et al 1976 <sup>112</sup>                                                                                       | Duration of intervention less than 24 weeks     |
| Liu et al 1985 <sup>113</sup>                                                                                             | Duration of intervention less than 24 weeks     |
| Lomuscio et al 1994 <sup>114</sup>                                                                                        | Not a randomized clinical trial                 |
| Madsbad et al 2001 <sup>115</sup>                                                                                         | Not comparing intervention of interest*         |
| Mafauzy 2002 <sup>116</sup>                                                                                               | Duration of intervention less than 24 weeks     |
| Marbury et al 1999 <sup>117</sup>                                                                                         | Not comparing intervention of interest*         |
| Mazzone et al 2006 <sup>118</sup>                                                                                         | Not comparing intervention of interest          |
| Memisogullari et al 2009 <sup>119</sup>                                                                                   | Not comparing intervention of interest*         |
| Meneilly 2011 <sup>120</sup>                                                                                              | Duration of intervention less than 24 weeks     |
| Mogensen et al 1976 <sup>121</sup>                                                                                        | Not comparing intervention of interest          |
| Nakamura et al 2000 <sup>122</sup>                                                                                        | Duration of intervention less than 24 weeks     |
| Nakamura et al 2004 <sup>123</sup>                                                                                        | Not comparing intervention of interest*         |
| Nakamura et al 2006 <sup>124</sup>                                                                                        | Not comparing intervention of interest*         |
| Nathan et al 1988 <sup>125</sup>                                                                                          | Not comparing intervention of interest*         |
| Nikkilä et al 1982 <sup>126</sup>                                                                                         | Not comparing intervention of interest          |
| Nissen et al 2008 <sup>127</sup>                                                                                          | Not comparing intervention of interest          |
| Noury et al 1991 <sup>128</sup>                                                                                           | Duration of intervention less than 24 weeks     |
| Omrani et al 2005 <sup>129</sup>                                                                                          | Assume not a randomized clinical trial          |
| Osei et al 2003 <sup>130</sup>                                                                                            | Not including participants with type 2 diabetes |
| Papa et al 2006 <sup>131</sup>                                                                                            | Duration of intervention less than 24 weeks     |
| Pagano et al 1995 <sup>132-134</sup>                                                                                      | Not comparing intervention of interest*         |
| Perez et al 2006 <sup>135</sup>                                                                                           | Not comparing intervention of interest          |
| Perriello et al 2007 <sup>136;137</sup>                                                                                   | Not comparing intervention of interest*         |
| Quatraro et al 1990 <sup>138</sup>                                                                                        | Not comparing intervention of interest          |
| Rao et al 2010 <sup>139</sup>                                                                                             | Not comparing intervention of interest          |
| Repaglinide studies <sup>140-142</sup>                                                                                    | Not comparing intervention of interest*         |
| Rosenstock et al 1993 <sup>143</sup>                                                                                      | Not comparing intervention of interest          |
| Rosenthal et al 2002 <sup>144-146</sup>                                                                                   | Not comparing intervention of interest*         |
| Rosiglitazone Evaluated for Cardiovascular Outcomes and Regulation of Glycaemia in Diabetes (RECORD) trial <sup>147</sup> | Not comparing intervention of interest          |
| Rupprecht et al 1993 <sup>148</sup>                                                                                       | Not a randomized clinical trial                 |
| Saadatnia et al 2009 <sup>149</sup>                                                                                       | Not a randomized clinical trial                 |
| Salman et al 2001 <sup>150</sup>                                                                                          | Not comparing intervention of interest*         |
| Sami et al 1996 <sup>151</sup>                                                                                            | Not comparing intervention of interest          |

|    |                                                                                |                                                                                |
|----|--------------------------------------------------------------------------------|--------------------------------------------------------------------------------|
| 1  |                                                                                |                                                                                |
| 2  |                                                                                |                                                                                |
| 3  |                                                                                |                                                                                |
| 4  | Sasahara et al 1999 <sup>152</sup>                                             | Not a randomized clinical trial                                                |
| 5  | Schernthaner et al 2004 <sup>153</sup>                                         | Not comparing intervention of interest                                         |
| 6  | Seck et al 2010 <sup>154</sup>                                                 | Not comparing intervention of interest                                         |
| 7  | Segal et al 1997 <sup>155</sup>                                                | Not comparing intervention of interest*                                        |
| 8  | Shihara et al 2011 <sup>156,157</sup>                                          | Not comparing intervention of interest*                                        |
| 9  | Shinoda et al 2009 <sup>158</sup>                                              | We assume not a randomized clinical trial.<br>Attempt made to contact authors. |
| 10 |                                                                                |                                                                                |
| 11 | Speiser et al 1989 <sup>159</sup>                                              | Duration of intervention less than 24 weeks                                    |
| 12 | Spengler et al 1992 <sup>160-164</sup>                                         | Not comparing intervention of interest*                                        |
| 13 |                                                                                |                                                                                |
| 14 | Sung et al 1999 <sup>165</sup>                                                 | Not comparing intervention of interest*                                        |
| 15 |                                                                                |                                                                                |
| 16 | Sutton et al 2002 <sup>166,167</sup>                                           | Not comparing intervention of interest*                                        |
| 17 | Tan et al 2004 <sup>168</sup>                                                  | Not comparing intervention of interest*                                        |
| 18 | Tan et al 2004a <sup>169</sup>                                                 | Not comparing intervention of interest*                                        |
| 19 | Tan et al 2005 <sup>170</sup>                                                  | Not comparing intervention of interest*                                        |
| 20 | Teramoto et al 2007 <sup>171</sup>                                             | Not comparing intervention of interest*                                        |
| 21 | The Liraglutide Effect and Action in Diabetes-3<br>(LEAD-3) <sup>172-177</sup> | Not comparing intervention of interest*                                        |
| 22 |                                                                                |                                                                                |
| 23 | Tolman et al 2009 <sup>178</sup>                                               | Not comparing intervention of interest                                         |
| 24 | Tovi et al 1998 <sup>179</sup>                                                 | Not comparing intervention of interest                                         |
| 25 |                                                                                |                                                                                |
| 26 | Toyota et al 1997 <sup>180</sup>                                               | Duration of intervention less than 24 weeks                                    |
| 27 | Tsumara 1995 <sup>181</sup>                                                    | Not comparing intervention of interest                                         |
| 28 | Umpierrez et al 1997 <sup>182</sup>                                            | Not exclusively include patients with type 2<br>diabetes                       |
| 29 |                                                                                |                                                                                |
| 30 | University Group Diabetes Program <sup>183-185</sup>                           | Not comparing intervention of interest*                                        |
| 31 | United Kingdom Diabetes Study 1998 <sup>186-190</sup>                          | Not comparing intervention of interest*                                        |
| 32 |                                                                                |                                                                                |
| 33 | Van de Laar et al 2004 <sup>191</sup>                                          | Not comparing intervention of interest*                                        |
| 34 | Vray et al 1995 <sup>192</sup>                                                 | Duration of intervention less than 24 weeks                                    |
| 35 | Wang et al 1994 <sup>193</sup>                                                 | Duration of intervention less than 24 weeks                                    |
| 36 | Watanabe et al 2005 <sup>194</sup>                                             | Not comparing intervention of interest*                                        |
| 37 | Wolffenbittel et al 1989 <sup>195</sup>                                        | Not comparing intervention of interest*                                        |
| 38 | Wolffenbittel et al 1999 <sup>196</sup>                                        | Not comparing intervention of interest*                                        |
| 39 |                                                                                |                                                                                |
| 40 | Wu et al 2010 <sup>197</sup>                                                   | Duration of intervention less than 24 weeks                                    |
| 41 | Yang et al 2009 <sup>198</sup>                                                 | Not including participants with type 2 diabetes                                |
| 42 | Zhang et al 2005 <sup>199</sup>                                                | Not comparing intervention of interest*                                        |
| 43 | Zhou 1999 <sup>200</sup>                                                       | Duration of intervention less than 24 weeks                                    |
| 44 |                                                                                |                                                                                |

\* Included in the full Cochrane version of the review

## Web appendix 4. Macrovascular definitions in trials

| Study                                   | Cardiovascular mortality                     | Cancer                                                   | Composite non-fatal macrovascular outcomes                                                                           | Non-fatal myocardial infarction                          | Non-fatal stroke                                                     | Amputation of lower extremity                            |
|-----------------------------------------|----------------------------------------------|----------------------------------------------------------|----------------------------------------------------------------------------------------------------------------------|----------------------------------------------------------|----------------------------------------------------------------------|----------------------------------------------------------|
| <b>ADOPT 2006</b> <sup>201-207</sup>    | All cardiovascular deaths                    | Serious adverse event malignancies excluding skin cancer | Major adverse cardiovascular events (fatal and non-fatal myocardial infarction, congestive heart failure and stroke) | Non-fatal myocardial infarction                          | Only total stroke reported. Unknown whether it is fatal or non-fatal | ND                                                       |
| <b>Campbell 1994</b> <sup>208</sup>     | ND                                           | ND                                                       | ND                                                                                                                   | ND                                                       | ND                                                                   | ND                                                       |
| <b>Collier 1989</b> <sup>209</sup>      | ND                                           | ND                                                       | ND                                                                                                                   | ND                                                       | ND                                                                   | ND                                                       |
| <b>DeFronzo 1995</b> <sup>210</sup>     | Death, possible due to myocardial infarction | ND                                                       | ND                                                                                                                   | ND                                                       | ND                                                                   | ND                                                       |
| <b>Derosa et al 2004</b> <sup>211</sup> | ND                                           | ND                                                       | ND                                                                                                                   | ND                                                       | ND                                                                   | ND                                                       |
| <b>Hermann 1991</b> <sup>212</sup>      | ND                                           | ND                                                       | ND                                                                                                                   | ND                                                       | ND                                                                   | ND                                                       |
| <b>Hermann 1991a</b> <sup>213-216</sup> | One patient had a sudden death               | ND                                                       | Cardiovascular adverse events                                                                                        | Non-fatal myocardial infarction                          | ND                                                                   | ND                                                       |
| <b>Kamel 1997</b> <sup>217</sup>        | ND                                           | ND                                                       | ND                                                                                                                   | ND                                                       | ND                                                                   | ND                                                       |
| <b>Lawrence 2004</b> <sup>218</sup>     | Death due to myocardial infarction           | ND                                                       | ND                                                                                                                   | Non-fatal myocardial infarction                          | ND                                                                   | ND                                                       |
| <b>Tang et al 2004</b> <sup>219</sup>   | ND                                           | ND                                                       | ND                                                                                                                   | ND                                                       | ND                                                                   | ND                                                       |
| <b>Tessier 1999</b> <sup>220</sup>      | ND                                           | ND                                                       | ND                                                                                                                   | ND                                                       | ND                                                                   | ND                                                       |
| <b>Tosi 2003</b> <sup>221</sup>         | ND                                           | ND                                                       | "No cardiovascular events was recorded during the study"                                                             | "No cardiovascular events was recorded during the study" | "No cardiovascular events was recorded during the study"             | "No cardiovascular events was recorded during the study" |



1  
2  
3  
4  
5  
6  
7  
8  
9  
10  
11  
12  
13  
14  
15  
16  
17  
18  
19  
20  
21  
22  
23  
24  
25  
26  
27  
28  
29  
30  
31  
32  
33  
34  
35  
36  
37  
38  
39  
40  
41  
42  
43  
44  
45  
46  
47  
48  
49  
50  
51  
52  
53  
54  
55  
56  
57  
58  
59  
60

|                                                |    |    |                        |                                                                                                      |                                                                                                     |                                                                                                          |
|------------------------------------------------|----|----|------------------------|------------------------------------------------------------------------------------------------------|-----------------------------------------------------------------------------------------------------|----------------------------------------------------------------------------------------------------------|
| <b>UKPDS<br/>34<sup>222-224</sup></b>          | ND | ND | ND                     | WHO clinical criteria with associated ECG/enzyme changes or new pathological Q wave (ICD 9 Code 410) | Major stroke-stroke with symptoms that persisted for more than one month (ICD 430 to 434.9 and 436) | Major limb complications-requiring amputation of digit or limb for any reason (ICD codes 5.845 to 5.848) |
| <b>Yamanouchi et al<br/>2005<sup>225</sup></b> | ND | ND | Adverse cardiac events | ND                                                                                                   | ND                                                                                                  | ND                                                                                                       |

Confidential



## Web appendix 5

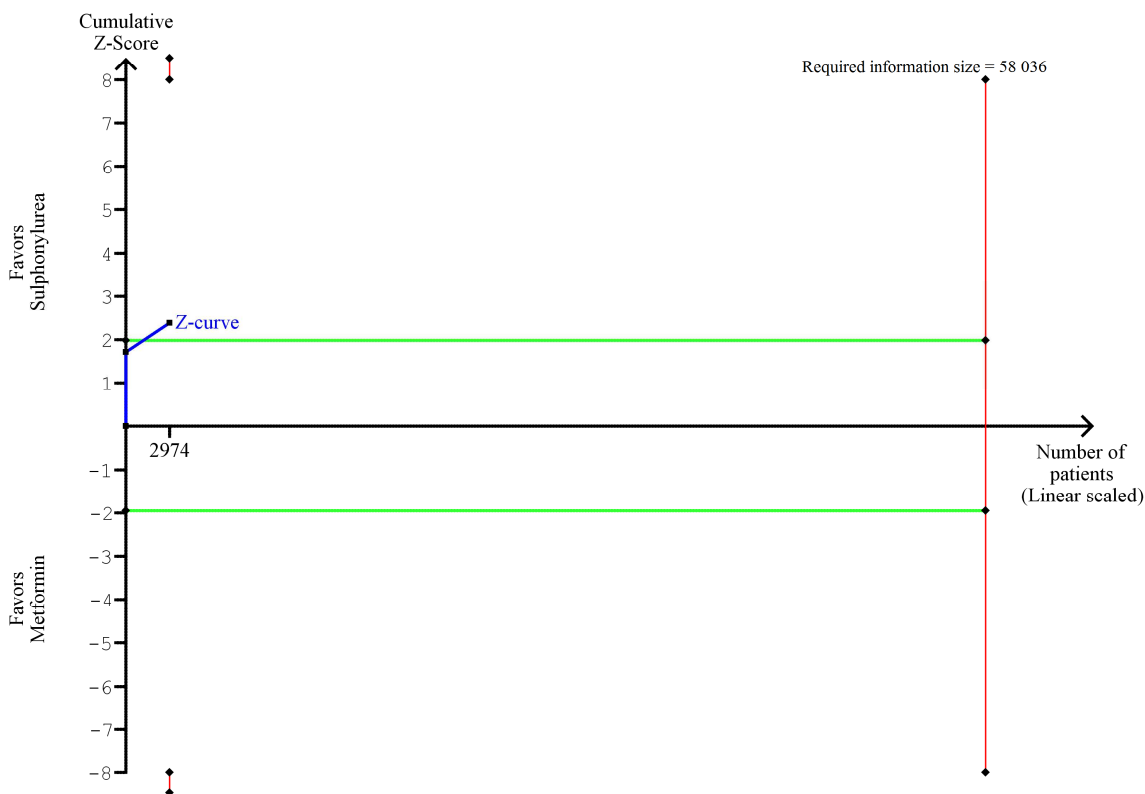

Web appendix 5a. Trial sequential analysis of the effect of second- and third-generation sulphonylurea versus metformin in type 2 diabetes on non-fatal macrovascular outcomes with a two-sided  $\alpha=5\%$ , a power of 80% anticipating, a control event proportion of 4.9%, a 10% relative risk reduction, and a diversity ( $D^2$ ) of 0%. The solid blue cumulative Z curve indicate the cumulated Z score from the inverse variance model Z statistic, whenever a new trial is added. The solid blue cumulative Z curve does not crosses the red trial sequential alpha spending monitoring boundaries for a 10% relative risk reduction. Horizontal green lines illustrate traditional level of statistical significance ( $P=0.05$ )

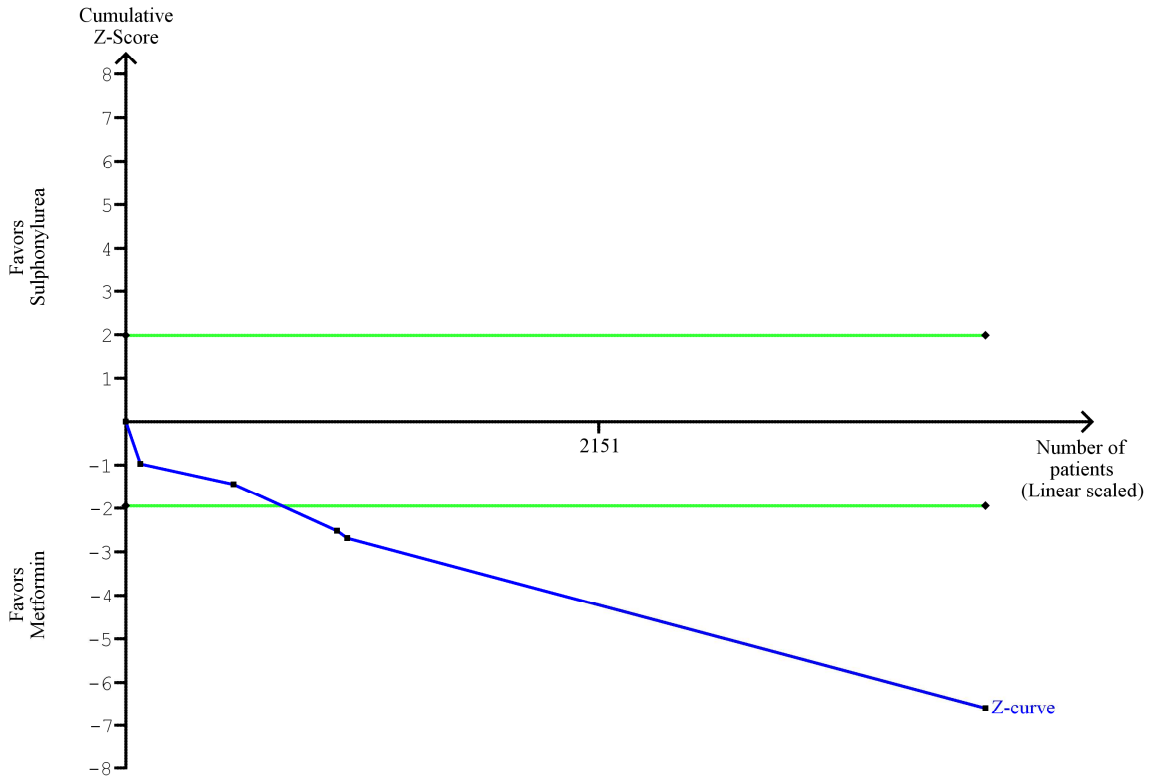

Web appendix 5b. Trial sequential analysis of the effect of second- and third-generation sulphonylurea versus metformin in type 2 diabetes on non-fatal macrovascular outcomes with a two-sided  $\alpha=5\%$ , a power of 80% anticipating, a control event proportion of 9.4%, a 10% relative risk reduction, and a diversity ( $D^2$ ) of 79%. The solid blue cumulative Z curve indicate the cumulated Z score from the inverse variance model Z statistic, whenever a new trial is added. The solid blue cumulative Z curve does not crosses the red trial sequential alpha spending monitoring boundaries for a 10% relative risk reduction. Horizontal green lines illustrate traditional level of statistical significance ( $P=0.05$ )

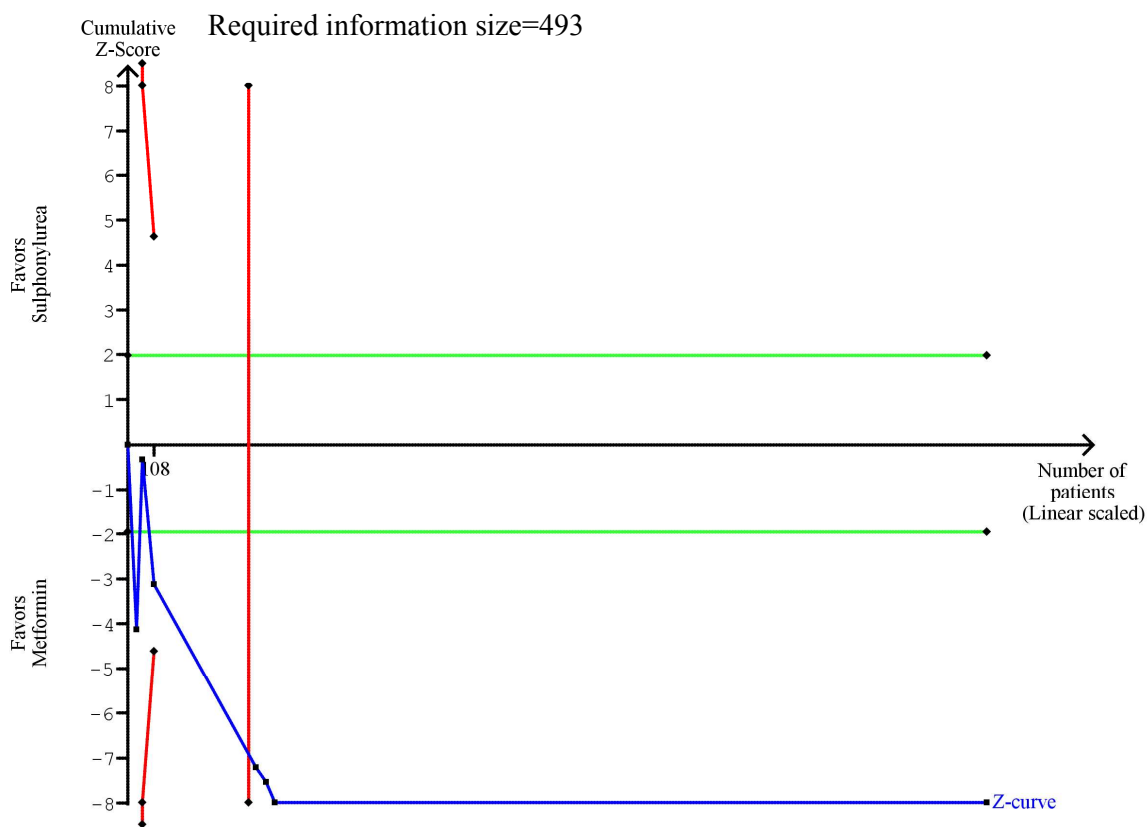

35 Web appendix 5c. Trial sequential analysis of the effect of second- and third-generation sulphonylurea versus  
 36 metformin in type 2 diabetes on weight (kg) with a two-sided  $\alpha=5\%$  and a power of 80% anticipating a mean difference  
 37 of 3.77 kg and a diversity ( $D^2$ ) of 65% as estimated in a random effects model. The solid blue cumulative Z curve  
 38 indicate the cumulated Z score from the inverse variance model Z statistic, whenever a new trial is added. The solid  
 39 blue cumulative Z curve crosses the red trial sequential alpha spending monitoring boundaries. Horizontal green lines  
 40 illustrate traditional level of statistical significance ( $P=0.05$ )  
 41  
 42  
 43  
 44  
 45  
 46  
 47  
 48  
 49  
 50  
 51  
 52  
 53  
 54  
 55  
 56  
 57  
 58  
 59  
 60

## Web appendix 6. Hypoglycaemia and adverse events definitions in trials

| Study                                   | Mild hypoglycaemia                          | Severe hypoglycaemia                         | Adverse events | Serious adverse events                                                                                                                                                                                                                                                                                                                              | Drop-outs due to adverse events        |
|-----------------------------------------|---------------------------------------------|----------------------------------------------|----------------|-----------------------------------------------------------------------------------------------------------------------------------------------------------------------------------------------------------------------------------------------------------------------------------------------------------------------------------------------------|----------------------------------------|
| <b>ADOPT 2006</b> <sup>201-207</sup>    | Hypoglycaemia requiring minor intervention  | Hypoglycaemia requiring medical intervention | Adverse events | Event that was fatal, life-threatening, or disabling, resulted in hospitalisation or prolonged hospital stay, was associated with congenital abnormality, cancer, or a drug overdose (intentional or accidental), or was suggested by the investigator as serious or suggested any substantial hazard, contraindication, side effect, or precaution | Drop-outs due to adverse events        |
| <b>Campbell 1994</b> <sup>208</sup>     | ND                                          | ND                                           | ND             | ND                                                                                                                                                                                                                                                                                                                                                  | ND                                     |
| <b>Collier 1989</b> <sup>209</sup>      | Mild hypoglycaemic episodes                 | ND                                           | ND             | ND                                                                                                                                                                                                                                                                                                                                                  | ND                                     |
| <b>DeFronzo 2005</b> <sup>210</sup>     | ND                                          | ND                                           | ND             | ND                                                                                                                                                                                                                                                                                                                                                  | Withdrawal due to adverse effects      |
| <b>Derosa et al 2004</b> <sup>211</sup> | ND                                          | ND                                           | ND             | ND                                                                                                                                                                                                                                                                                                                                                  | Drop-out due to transient side effects |
| <b>Hermann 1991</b> <sup>212</sup>      | ND                                          | ND                                           | ND             | Serious adverse events                                                                                                                                                                                                                                                                                                                              | ND                                     |
| <b>Hermann 1991a</b> <sup>213-216</sup> | Hypoglycaemia, including tremor. No one had | Serious, long-lasting hypoglycaemia          | Adverse events | ND                                                                                                                                                                                                                                                                                                                                                  | Withdrawn due to adverse events        |

|                                            |                                                                                                                                                       |                                                                                                                    |                |                        |                                            |
|--------------------------------------------|-------------------------------------------------------------------------------------------------------------------------------------------------------|--------------------------------------------------------------------------------------------------------------------|----------------|------------------------|--------------------------------------------|
|                                            | severe hypoglycaemia                                                                                                                                  |                                                                                                                    |                |                        |                                            |
| <b>Kamel 1997<sup>217</sup></b>            | ND                                                                                                                                                    | ND                                                                                                                 | ND             | ND                     | ND                                         |
| <b>Lawrence 2004<sup>218</sup></b>         | ND                                                                                                                                                    | ND                                                                                                                 | ND             | ND                     | ND                                         |
| <b>Tang et al 2004<sup>219</sup></b>       | ND                                                                                                                                                    | ND                                                                                                                 | ND             | ND                     | ND                                         |
| <b>Tessier 1999<sup>220</sup></b>          | ND                                                                                                                                                    | ND                                                                                                                 | ND             | ND                     | ND                                         |
| <b>Tosi 2003<sup>221</sup></b>             | Mild symptoms, suggestive of hypoglycaemia                                                                                                            | Severe episodes of hypoglycaemia                                                                                   | Adverse events | Serious adverse events | Drop-outs due to adverse events            |
| <b>UKPDS 34<sup>222-224</sup></b>          | Hypoglycaemic episodes were defined as minor if the patient was able to treat the symptoms unaided. Data in meta-analysis after one year of follow-up | Major if third-party help or medical intervention was necessary. Data in meta-analysis after one year of follow-up | ND             | ND                     | ND                                         |
| <b>Yamanouchi et al 2005<sup>225</sup></b> | ND                                                                                                                                                    | ND                                                                                                                 | ND             | ND                     | Discontinuation of treatment due to oedema |

ADOPT= A Diabetes Outcome Progression Trial; NR= not reported; UKPDS= United Kingdom Prospective Diabetes Study

## References

- (1) Abbatecola AM, Rizzo MR, Barbieri M, Grella R, Arciello A, Laieta MT et al. Postprandial plasma glucose excursions and cognitive functioning in aged type 2 diabetics. *Neurology* 2006; 67(2):235-240.
- (2) Adetuyibi A, Ogundipe O. A comparative trial of glipizide, glibenclamide and chlorpropamide in the management of maturity-onset diabetes mellitus in nigerians. *Current Therapeutic Research Clinical and Experimental* 1977; 21(4):485.
- (3) Adlung J, Koch CD. Influence of tolbutamide on serum glucose level, specific activity of glucose and glucose oxidation in severe diabetes. *International Journal of Clinical Pharmacology, Therapy and Toxicology* 1974; 10(2):128-135.
- (4) Ahuja MM, Gupta SP, Sehgel VK. Efficacy of glibenclamide in maturity-onset diabetics as maintenance therapy. *Hormone and Metabolic Research* 1973; 5(3):160-163.
- (5) Akanuma Y, Kosaka K, Kanazawa Y, Kasuga M, Fukuda M, Aoki S. Long-term comparison of oral hypoglycemic agents in diabetic retinopathy. Gliclazide vs. other sulfonylureas. *Diabetes Research and Clinical Practice* 1988; 5(2):81-90.
- (6) Almer LO. Effect of chlorpropamide and gliclazide on plasminogen activator activity in vascular walls in patients with maturity onset diabetes. *Thrombosis Research* 1984; 35(1):19-25.
- (7) Alvarsson M, Berntorp K, Fernqvist-Forbes E, Lager I, Steen L, Orn T et al. Effects of insulin versus sulphonylurea on beta-cell secretion in recently diagnosed type 2 diabetes patients: A 6-year follow-up study. *Review of Diabetic Studies* 2010; 7(3):231-238.
- (8) Alvarsson M, Sundkvist G, Lager I, Henricsson M, Berntorp K, Fernqvist-Forbes E et al. Beneficial effects of insulin versus sulphonylurea on insulin secretion and metabolic control in recently diagnosed type 2 diabetic patients. *Diabetes Care* 2003; 26(8):2231-2237.
- (9) Alvarsson M, Sundkvist G, Lager I, Berntorp K, Fernqvist-Forbes E, Steen L et al. Effects of insulin vs. glibenclamide in recently diagnosed patients with type 2 diabetes: a 4-year follow-up. *Diabetes, Obesity & Metabolism* 2008; 10(5):421-429.
- (10) Aman M, Jawad F, Sultana S, Waiz uH, Nanji R. Clinical trial with glipizide in uncomplicated maturity onset diabetes mellitus. *JPMA - Journal of the Pakistan Medical Association* 1977; 27(3):293-295.
- (11) GlaxoSmithKline. Rosiglitazone Versus a Sulfonylurea On Progression Of Atherosclerosis In Patients With Heart Disease And Type 2 Diabetes. <http://clinicaltrials.gov/ct2/show/NCT00116831?term=nct00116831&rank=1>
- (12) Gerstein HC, Ratner RE, Cannon CP, Serruys PW, García-García HM, van Es GA et al. Effect of rosiglitazone on progression of coronary atherosclerosis in patients with type 2 diabetes mellitus and coronary artery disease: the assessment on the prevention of

- 1  
2  
3  
4 progression by rosiglitazone on atherosclerosis in diabetes patients with cardiovascular  
5 history trial. *Circulation* 2010; 121(10):1176-1187.  
6
- 7 (13) Ratner RE, Christopher PC, Gerstein HC, Nesto RW, Serruys PW, van Es GAe. Assessment  
8 on the Prevention of Progression by Rosiglitazone on Atherosclerosis in diabetes patients  
9 with Cardiovascular History (APPROACH): study design and baseline characteristics.  
10 *American Heart Journal* 2008; 156(6):1074-1079.  
11
- 12 (14) Baba S, Nakagawa S, Takebe K, Goto Y, Maezawa H, Takeda R et al. Double-Blind  
13 Randomized Control Study with Gliclazide. *Rinsho Hyoka (Clinical Evaluation)* 1983;  
14 11(1):51-94.  
15
- 16 (15) Balabolkin MI, Morozova TP, Zhizhina SA, Novikova NV, Nepsha VD. [The effect of  
17 diamicon on various blood coagulation indices in patients with type II diabetes mellitus].  
18 *Klinicheskaja Meditsina* 1983; 61(4):66-68.  
19
- 20 (16) Balabolkin MI, Nedosugova LV. Effect of long-term therapy with sulfanylurea preparations  
21 on the relation of insulin secretion and the insulin-binding capacity of its receptors.  
22 *Terapevticheskii Arkhiv* 1988; 60(12):91-96.  
23
- 24 (17) Banerji MA, Chaiken RL, Lebovitz HE. Prolongation of near-normoglycemic remission in  
25 black NIDDM subjects with chronic low-dose sulfonylurea treatment. *Diabetes* 1995;  
26 44(4):466-470.  
27
- 28 (18) BARI 2DSG. A randomized trial of therapies for type 2 diabetes and coronary artery  
29 disease. *The New England Journal of Medicine* 2009; 360(24):2503-2515.  
30
- 31 (19) Bellomo DA, Stefanelli G, Laviola L, Giorgino R, Giorgino F. Nateglinide provides tighter  
32 glycaemic control than glyburide in patients with Type 2 diabetes with prevalent  
33 postprandial hyperglycaemia. *Diabetic Medicine* 2011; 28(5):560-566.  
34
- 35 (20) Belovalova IM, Gamburtseva TD, Kniazeva AP, Matveeva LS, Starosel'tseva LK. The  
36 nature of the pancreatic hormone secretion and of the metabolic indices during the acute and  
37 chronic administration of peroral hypoglycemic preparations. *Problemy Endokrinologii*  
38 1990; 36(1):14-20.  
39
- 40 (21) Ben Khelifa F, Sellami S, Abid M, Fitouhi B, Jerbi A, Jedidi S et al. Comparison of the  
41 hypoglycemic effect of 2 presentations--of glibenclamide. *La Tunisie Medicale* 1988;  
42 66(12):887-893.  
43
- 44 (22) Berber MJ, Tomkin GH. The effects of gliclazide in diabetes: A comparison with  
45 tolbutamide. *Irish Journal of Medical Science* 1982; 151(2):46-49.  
46
- 47 (23) Bernas M, Czech A, Taton J. Relative effectiveness of tolbutamide, chlorpropamide and  
48 gliclazide. *Polski Tygodnik Lekarski* 1992; 47(1-2):35-39.  
49
- 50 (24) Berry EM, Bar-On H. Comparison of sulphonylurea and insulin treatment on lipid levels in  
51 maturity-onset diabetic men and women. *Israel Journal of Medical Sciences* 1981;  
52 17(5):384-387.  
53  
54  
55  
56  
57  
58  
59  
60

- 1
- 2
- 3
- 4 (25) Birkeland KI, Furueth K, Melander A, Mowinckel P, Vaaler S. Long-term randomized
- 5 placebo-controlled double-blind therapeutic comparison of glipizide and glyburide.
- 6 Glycemic control and insulin secretion during 15 months. *Diabetes Care* 1994; 17(1):45-49.
- 7
- 8 (26) Birkeland KI, Hanssen KF, Urdal P, Berg K, Vaaler S. A long-term, randomized,
- 9 comparative study of insulin versus sulfonylurea therapy in type 2 diabetes. *Journal of*
- 10 *Internal Medicine* 1994; 236(3):305-313.
- 11
- 12 (27) Birkeland KI, Kilhovd B, Thorsby P, Torjesen PA, Ganss R, Vaaler S et al. Heterogeneity of
- 13 non-insulin-dependent diabetes expressed as variability in insulin sensitivity, beta-cell
- 14 function and cardiovascular risk profile. *Diabetic Medicine* 2002; 20:37-45.
- 15
- 16 (28) Birkeland KI, Rishaug U, Hanssen KF, Vaaler S. NIDDM: a rapid progressive disease.
- 17 Results from a long-term, randomised, comparative study of insulin or sulphonylurea
- 18 treatment. *Diabetologia* 1996; 39(12):1629-1633.
- 19
- 20 (29) Blumenbach L, Kiesselbach N, Lehnert J. Further results of a multi-centre clinical trial with
- 21 the oral antidiabetic drug glisoxepide. *Arzneimittel-Forschung* 1976; 26(5):931-943.
- 22
- 23 (30) Bruns W, Jutzi E, Staritz B, Willkommen G, Willkommen G. Treatment of type II diabetics
- 24 (non-insulin-dependent) for sulphonylurea secondary failure - combined therapy, using
- 25 glibenclamid and insulin. *Zeitschrift für klinische Medizin* 1990; 45(11):983-986.
- 26
- 27 (31) Calvagno M, Acacia E, Kremer P, Marowsky C, Maccione E, Taddey N et al. Clinical and
- 28 biomedical study of a sulphonylurea hypoglycemic agent with action at vascular level.
- 29 *Semana Médica* 1983; 162(20):799-808.
- 30
- 31 (32) Cefalu WT, Bell-Farrow A, Wang ZQ, McBride D, Dagleish D, Terry JG. Effect of
- 32 glipizide GITS on insulin sensitivity, glycemic indices, and abdominal fat composition in
- 33 NIDDM. *Drug Development Research* 1998; 44(1):1-7.
- 34
- 35 (33) Ceriello A, Johns D, Widell M, Eckland DJ, Gilmore KJ, Tan MH. Comparison of effect of
- 36 pioglitazone with metformin or sulfonylurea (monotherapy and combination therapy) on
- 37 postload glycemia and composite insulin sensitivity index during an oral glucose tolerance
- 38 test in patients with type 2 diabetes. *Diabetes Care* 2005; 28(2):266-272.
- 39
- 40 (34) Chan TK, Chan V, Teng CS, Yeung RTT. Effects of gliclazide and glibenclamide on
- 41 platelet function, fibrinolysis and metabolic control in diabetic patients with retinopathy.
- 42 *Semaine des Hopitaux* 1982; 58(19):1197-1200.
- 43
- 44 (35) Chandra ST, Priya G, Khurana ML, Jyotsna VP, Sreenivas V, Dwivedi S et al. Comparison
- 45 of gliclazide with insulin as initial treatment modality in newly diagnosed type 2 diabetes.
- 46 *Diabetes Technology & Therapeutics* 2008; 10(5):363-368.
- 47
- 48 (36) Charbonnel B, Roden M, Urquhart R, Mariz S, Johns D, Mihm M et al. Pioglitazone elicits
- 49 long-term improvements in insulin sensitivity in patients with type 2 diabetes: comparisons
- 50 with gliclazide-based regimens. *Diabetologia* 2005; 48(3):553-560.
- 51
- 52 (37) Charbonnel BH, Matthews DR, Schernthaner G, Hanefeld M, Brunetti P, QUARTET S. A
- 53 long-term comparison of pioglitazone and gliclazide in patients with type 2 diabetes
- 54
- 55
- 56
- 57
- 58
- 59
- 60



- 1  
2  
3  
4 mellitus: a randomized, double-blind, parallel-group comparison trial. *Diabetic Medicine*  
5 2005; 22(4):399-405.  
6
- 7 (38) Chen H. Pharmacokinetic and clinical study on glibenclamide. *Zhonghua yi xue za zhi*  
8 1987; 67(10):533-535.  
9
- 10 (39) Coniff RF, Shapiro JA, Seaton TB, Bray GAB. Multicenter, placebo-controlled trial  
11 comparing acarbose (BAY g 5421) with placebo, tolbutamide, and tolbutamide-plus-  
12 acarbose in non-insulin-dependent diabetes mellitus. *The American Journal of Medicine*  
13 1995; 98(5):443-451.  
14
- 15 (40) Cortinovis A, Crippa A, Sciacca V, Caravaggio V, Crippa M. Modificazioni emoreologiche,  
16 metaboliche ed emocogulative in diabetici in trattamento con sulfaniluree. *Minerva Medica*  
17 1998; 79(5):391-398.  
18
- 19 (41) Dalzell GW, Hadden DR, Atkinson AB, Kennedy L, Weaver JA. A randomized trial of  
20 tolbutamide and metformin for persistent severe hypoglycaemia in non insulin dependent  
21 diabetes mellitus (NIDDM). *Irish Endocrine Society* 1986; 155(9):341-342.  
22
- 23 (42) Deng QW. Clinical observation on Xiayaosan modified for treatment of type 2 diabetes  
24 mellitus. *Hubei Journal of Traditional Chinese Medicine* 2003; 25(12):31-32.  
25
- 26 (43) Derosa G, Mugellini A, Ciccarelli L, Crescenzi G, Fogari R. Comparison between  
27 repaglinide and glimepiride in patients with type 2 diabetes mellitus: A one-year,  
28 randomized, double-blind assessment of metabolic parameters and cardiovascular risk  
29 factor. *Clinical Therapeutics* 2003; 25(2):472-484.  
30
- 31 (44) Derosa G, Maffioli P, Salvadeo SAT, Ferrari I, Ragonesi PD, Querci F et al. Exenatide  
32 versus glibenclamide in patients with diabetes. *Diabetes Technology and Therapeutics* 2010;  
33 12(3):233-240.  
34
- 35 (45) Diehl AK, Sugarek NJ, Bauer RL. Medication compliance in non-insulin-dependent  
36 diabetes: a randomized comparison of chlorpropamide and insulin. *Diabetes Care* 1985;  
37 8(3):219-223.  
38
- 39 (46) Dills DG, Schneider J. Clinical evaluation of glimepiride versus glyburide in NIDDM in a  
40 double-blind comparative study. Glimepiride/Glyburide Research Group. *Hormone and*  
41 *Metabolic Research* 1996; 28(9):426-429.  
42
- 43 (47) Dowe KE, Grant AP, Hayes JR. Glipizide evaluation after a one year trial in maturity onset  
44 diabetics. *Ulster Medical Journal* 1979; 48(1):65-68.  
45
- 46 (48) Drouin P. Diamicon MR once daily is effective and well tolerated in type 2 diabetes: a  
47 double-blind, randomized, multinational study. *Journal of Diabetes & its Complications*  
48 2000; 14(4):185-191.  
49
- 50 (49) Drouin P, Standl E, Diamicon MR. Gliclazide modified release: results of a 2-year study in  
51 patients with type 2 diabetes. *Diabetes, Obesity & Metabolism* 2004; 6(6):414-421.  
52  
53  
54  
55  
56  
57  
58  
59  
60

- 1  
2  
3  
4 (50) Duprey J, Lubetzki J. [Insulin secretion in maturity-onset diabetes mellitus. Effects of the  
5 prolonged administration of glybutamide]. *La Presse Medicale* 1971; 79(54):2469-2471.  
6  
7 (51) Ebeling P, Teppo A, Koistinen HA, Koivisto VA. Concentration of the complement  
8 activation product, acylation-stimulating protein, is related to C-reactive protein in patients  
9 with type 2 diabetes. *Metabolism* 2001; 50(3):283-287.  
10  
11 (52) Engelhardt HT, Vecchio TJ. The long-term effect of tolbutamide on glucose tolerance in  
12 adult, asymptomatic, latent diabetics. *Metabolism* 1965; 14:885-890.  
13  
14 (53) Esposito K, Giugliano D, Nappo F, Marfella RfCP. Regression of carotid atherosclerosis by  
15 control of postprandial hyperglycemia in type 2 diabetes mellitus. *Circulation* 2004;  
16 110(2):214-219.  
17  
18 (54) Feinböck C, Luger A, Klingler A, Egger T, Bielesz GK, Winkler F et al. Prospective  
19 multicentre trial comparing the efficacy of, and compliance with, glimepiride or acarbose  
20 treatment in patients with type 2 diabetes not controlled with diet alone. *Diabetes, Nutrition*  
21 *& Metabolism* 2003; 16(4):214-221.  
22  
23 (55) Ferner RE, Antsiferov ML, Kelman AW, Alberti KGMM, Rawlins MD. The relationships  
24 between dose and concentration of tolbutamide and insulin and glucose responses in patients  
25 with non-insulin-dependent diabetes. *European Journal of Clinical Pharmacology* 1991;  
26 40(2):163-168.  
27  
28 (56) Fineberg SE, Schneider SH. Glipizide versus tolbutamide, an open trial. Effects on insulin  
29 secretory patterns and glucose concentrations. *Diabetologia* 1980; 18(1):49-54.  
30  
31 (57) Foley JE, Sreenan S. Efficacy and safety comparison between the DPP-4 inhibitor  
32 vildagliptin and the sulfonylurea gliclazide after two years of monotherapy in drug-naive  
33 patients with type 2 diabetes.[Erratum appears in *Horm Metab Res.* 2009 Dec;41(12):909].  
34 *Hormone & Metabolic Research* 2009; 41(12):905-909.  
35  
36 (58) www.clinicaltrials.gov. Efficacy and Safety of Vildagliptin Compared to Gliclazide in Drug  
37 Naive Patients With Type 2 Diabetes.  
38 <http://clinicaltrials.gov/ct2/show/NCT00102388?term=nct00102388&rank=1> [ 2011  
39  
40  
41  
42 (59) Forst T, Eriksson JW, Strotmann HJ, Bai S, Brunelle R, Gulliya KS et al. Metabolic effects  
43 of mealtime insulin lispro in comparison to glibenclamide in early type 2 diabetes.  
44 *Experimental and Clinical Endocrinology & Diabetes* 2003; 111(2):97-103.  
45  
46 (60) Forst T, Hohberg C, Fuellert SD, Lübben G, Konrad T, Löbig M et al. Pharmacological  
47 PPARgamma stimulation in contrast to beta cell stimulation results in an improvement in  
48 adiponectin and proinsulin intact levels and reduces intima media thickness in patients with  
49 type 2 diabetes. *Horm Metab Res* 2005; 37(8):521-527.  
50  
51 (61) Forst T, Lübben G, Hohberg C, Kann P, Sachara C, Gottschall V et al. Influence of glucose  
52 control and improvement of insulin resistance on microvascular blood flow and endothelial  
53 function in patients with diabetes mellitus type 2. *Microcirculation* 2005; 12(7):543-550.  
54  
55  
56  
57  
58  
59  
60

- 1  
2  
3  
4 (62) Forst T, Weber M, Pfützner A, Löbig M, Hohberg C, Fuchs W. C-Peptide and Intima Media  
5 Thickness in Type 2 Diabetes Mellitus Treated With Pioglitazone. *Diabetes Stoffwechsel*  
6 *Und Herz* 2011; 20(2).  
7
- 8 (63) Fuchs K. Glipizide versus tolbutamide in maturity-onset diabetes, an open comparative  
9 study. *Diabetologia* 1973; 9(Suppl):351-355.  
10
- 11 (64) Garber AJ, Larsen J, Schneider SH, Piper BA, Henry D, Metformin Initial Therapy S.  
12 Simultaneous glyburide/metformin therapy is superior to component monotherapy as an  
13 initial pharmacological treatment for type 2 diabetes. *Diabetes, Obesity & Metabolism* 2002;  
14 4(3):201-208.  
15
- 16 (65) Garber AJ, Bruce S, Fiedorek FT. Durability of efficacy and long-term safety profile of  
17 glyburide/metformin tablets in patients with type 2 diabetes mellitus: an open-label  
18 extension study. *Clinical Therapeutics* 2002; 24(9):1401-1413.  
19
- 20 (66) Garber AJ, Donovan DS J, Dandona P, Bruce S, Park JS. Efficacy of glyburide/metformin  
21 tablets compared with initial monotherapy in type 2 diabetes. *Journal of Clinical*  
22 *Endocrinology & Metabolism* 2003; 88(8):3598-3604.  
23
- 24 (67) Gargiulo P, Caccese D, Pignatelli P, Brufani C, De Vito F, Marino Re. Metformin decreases  
25 platelet superoxide anion production in diabetic patients. *Diabetes/Metabolism Research and*  
26 *Reviews* 2001; 18(2):156-159.  
27
- 28 (68) Giles TD, Miller AB, Elkayam U, Bhattacharya M, Perez A. Pioglitazone and heart failure:  
29 results from a controlled study in patients with type 2 diabetes mellitus and systolic  
30 dysfunction. *Journal of Cardiac Failure* 2008; 14(6):445-452.  
31
- 32 (69) Giles TD, Elkayam U, Bhattacharya M, Perez A, Miller AB. Comparison of Pioglitazone vs  
33 Glyburide in Early Heart Failure: Insights From a Randomized Controlled Study of Patients  
34 With Type 2 Diabetes and Mild Cardiac Disease. *Congestive Heart Failure* 2010; 16(3):111-  
35 117.  
36
- 37 (70) Goldberg RB, Holvey SM, Schneider J, Bansal S, Blonde L, Boden G et al. A Dose-  
38 Response Study of Glimepiride in Patients With Niddm Who Have Previously Received  
39 Sulfonylurea Agents. *Diabetes Care* 1996; 19(8):849-856.  
40
- 41 (71) Groop L, Widén E, Franssila-Kallunki A, Ekstrand A, Saloranta C, Schalin C et al. Different  
42 effects of insulin and oral antidiabetic agents on glucose and energy metabolism in type 2  
43 (non-insulin-dependent) diabetes mellitus. *Diabetologia* 1989; 32(8):599-605.  
44
- 45 (72) Gudat U, Bungert S, Kemmer F, Heinemann L. The blood glucose lowering effects of  
46 exercise and glibenclamide in patients with type 2 diabetes mellitus. *Diabetic Medicine: a*  
47 *journal of the British Diabetic Association* 1998; 15(3):194-198.  
48
- 49 (73) Gurling KJ. A comparison of glibenclamide with chlorpropamide in newly diagnosed  
50 maturity-onset diabetes. *Postgraduate Medical Journal* 1970; (Suppl):66-69.  
51  
52  
53  
54  
55  
56  
57  
58  
59  
60

- 1  
2  
3  
4 (74) Happ J, Beyer J, Nest E, Fröhlich A, Althoff PH, Schöffling K. Blood sugar, serum insulin,  
5 nonesterified fatty acids and somatotropin in daily profile in adult diabetics under  
6 monotherapy with various sulfonylureas. *Arzneimittel-Forschung* 1974; 24(8):1228-1234.  
7
- 8 (75) Charbonnel B, Lonnqvist F, Jones NP. Rosiglitazone is superior to glyburide in reducing  
9 fasting plasma glucose after one year of treatment in type 2 diabetic patients. *Diabetes* 1999;  
10 48(Suppl 1).  
11
- 12 (76) GlaxoSmithKline. A Multicentre, Double-Blind, Parallel Group Comparative Study to  
13 Evaluate the Efficacy, Safety and Tolerability of Rosiglitazone vs. Glibenclamide Therapy,  
14 When Administered to Patients with Type 2 Diabetes Mellitus. GSK Homepage 2011; Study  
15 No.: 49653/020.  
16
- 17 (77) Hanefeld M, Patwardhan R, Jones NP. A one-year study comparing the efficacy and safety  
18 of rosiglitazone and glibenclamide in the treatment of type 2 diabetes. *Nutrition, Metabolism  
19 & Cardiovascular Diseases* 2007; 17:13-23.  
20
- 21 (78) Harrower AD. Comparison of diabetic control in type 2 (non-insulin dependent) diabetic  
22 patients treated with different sulphonylureas. *Current Medical Research and Opinion* 1985;  
23 9(10):676-680.  
24
- 25 (79) Haupt E, Beyer J, Schoffling K. [The influence of various sulphonylurea derivatives on the  
26 oral glucose-tolerance tests in healthy subjects and obese and maturity-onset diabetics  
27 (author's transl)]. [German]. *Deutsche Medizinische Wochenschrift* 1974; 99(9):385-388.  
28
- 29 (80) Hoffmann JK. Adjustment of metabolism and eating behaviour of type II diabetics. Results  
30 of a six-months treatment with glibenclamide, respectively with acarbose. *Zeitschrift für  
31 Allgemeinmedizin* 1992; 68(29):970-977.  
32
- 33 (81) Hoffmann J. Acarbose and glibenclamide in type-II diabetes. A comparative study on  
34 efficacy and side effects (therapeutical news). *Münchener Medizinische Wochenschrift*  
35 1990; 132(31-32):487-490.  
36
- 37 (82) Hoffmann J, Spengler M. Efficacy of 24-week monotherapy with acarbose, glibenclamide,  
38 or placebo in NIDDM patients. The Essen Study. *Diabetes Care* 1994; 17(6):561-566.  
39
- 40 (83) Hollander P, Bunkerslawson T, Bergenstal R, Mazze R. A Randomized Clinical Trial of  
41 Glyburide Versus Insulin Using Staged Diabetes Management to Achieve Euglycemia in  
42 Niddm. *Diabetologia* 1992; 35:A198.  
43
- 44 (84) Hollander PA, Schwartz SL, Gatlin MR, Haas SJ, Zheng H, Foley JE et al. Importance of  
45 early insulin secretion: comparison of nateglinide and glyburide in previously diet-treated  
46 patients with type 2 diabetes. *Diabetes Care* 2001; 24(6):983-988.  
47
- 48 (85) Howes LG. Cardiovascular effects of sulphonylureas: Role of K(ATP) channels. *Diabetes,  
49 Obesity and Metabolism* 2000; 2(2):67-73.  
50
- 51 (86) Hristov V, Sheinkova G, Simeonov S, Botushanov N, Valkov Y, Tzinlikov I. Clinical  
52 assessment of glimepiride (Amaril) in the treatment of type 2 diabetes mellitus patients  
53 (results of a multicenter study). *Endocrinologia* 2002; 7(1):30-35.  
54  
55  
56  
57  
58  
59  
60

- 1  
2  
3  
4 (87) Hussain SA. Silymarin as an adjunct to glibenclamide therapy improves long-term and  
5 postprandial glycemic control and body mass index in type 2 diabetes. *Journal of Medicinal*  
6 *Food* 2007; 10(3):543-547.  
7
- 8 (88) Inukai K, Watanabe M, Nakashima Y, Sawa T, Takata N, Tanaka M et al. Efficacy of  
9 glimepiride in Japanese type 2 diabetic subjects. *Diabetes Research and Clinical Practice*  
10 2005; 68(3):250-257.  
11
- 12 (89) Irsigler K, Ogris E, Steinhardt T, Brandle J, Regal H, Zdolsek I. [Comparison of  
13 glibenclamide, gliquidone, glisoxepide and placebo in maturity onset diabetics of differing  
14 degrees of severity (author's transl)]. [German]. *Wiener Klinische Wochenschrift* 1979;  
15 91(16):541-550.  
16
- 17 (90) Ishizuka T, Taniguchi O, Yamamoto M, Kajita K, Nagashima T, Takeda N et al. Thrombin-  
18 induced platelet aggregation, phosphoinositide metabolism and protein phosphorylation in  
19 NIDDM patients treated by diet, sulphonylurea or insulin. *Diabetologia* 1994; 37(6):632-  
20 638.  
21
- 22 (91) Jackson WP, Vinik AI. Preliminary trial of a powerful new sulphonylurea in maturity-onset  
23 diabetes-HB419 (glibenclamide). *South African Medical Journal* 1969; 43(32):1002-1004.  
24
- 25 (92) Jain R, Osei K, Kupfer S, Perez AT, Zhang J. Long-term safety of pioglitazone versus  
26 glyburide in patients with recently diagnosed type 2 diabetes mellitus. *Pharmacotherapy*  
27 2006; 26(10):1388-1395.  
28
- 29 (93) Jerums G, Murray RML, Seeman E. Lack of effect of gliclazide on early diabetic  
30 nephropathy and retinopathy: A two-year controlled study. *Diabetes Research and Clinical*  
31 *Practice* 1987; 3(2):71-80.  
32
- 33 (94) Jibrán R, Suliman MI, Qureshi F, Ahmed M. Safety and efficacy of repaglinide compared  
34 with glibenclamide in the management of type 2 diabetic Pakistani patients. *Pakistan Journal*  
35 *of Medical Sciences* 2006; 22(4):385-390.  
36
- 37 (95) Johnston AT, Ireland JT. A comparison of glibenclamide and chlorpropamide in the  
38 treatment of non-obese maturity onset diabetics. *Postgraduate Medical Journal* 1970;  
39 December(Suppl):98-100.  
40
- 41 (96) Johnston PS, Lebovitz HE, Coniff RF, Simonson DC, Raskin P, Munera CL. Advantages of  
42 alpha-glucosidase inhibition as monotherapy in elderly type 2 diabetic patients. *The Journal*  
43 *of Clinical Endocrinology and Metabolism* 1997; 83(5):1515-1522.  
44
- 45 (97) Josephkutti S, Potter JM. Comparison of tolbutamide and metformin in elderly diabetic  
46 patients. *Diabetic medicine : a journal of the British Diabetic Association* 1990; 7(6):510-  
47 514.  
48
- 49 (98) Joshi A, Gupta BS, Sharma SK, Singh V, Chaturvedi MK, Singhal A et al. Comparative  
50 study of repaglinide with glibenclamide in the management of type 2 diabetes mellitus  
51 [abstract no:12]. *Journal of the Association of Physicians of India* 2002; 50.  
52  
53  
54  
55  
56  
57  
58  
59  
60



- 1  
2  
3  
4 (99) Kakhnovskii IM, Koroleva TV, Zakharchenko VN, Larionov SN. A comparative evaluation  
5 of the effect of glurenorm and sulfonylurea preparations on the intravascular  
6 microcirculatory indices in type-II diabetes mellitus. Problemy Endokrinologii 1993;  
7 39(2):7-9.  
8
- 9  
10 (100) Kaku K, Rasmussen MF, Nishida T, Seino Y. Fifty-two-week, randomized, multicenter trial  
11 to compare the safety and efficacy of the novel glucagon-like peptide-1 analog liraglutide vs  
12 glibenclamide in patients with type 2 diabetes. J Diabetes Invest 2011; doi: 10.1111/j.2040-  
13 1124.2011.00128.x.  
14
- 15 (101) Seino Y, Rasmussen MF, Nishida T, Kaku K. Efficacy and safety of the once-daily human  
16 GLP-1 analogue, liraglutide, vs glibenclamide monotherapy in Japanese patients with type 2  
17 diabetes. Current Medical Research and Opinion 2010; 26(5):1013-1022.  
18
- 19 (102) Liraglutide is statistically superior to glibenclamide at controlling glycemia and weight,  
20 with low hypoglycemic risk, and improves beta-cell function in Japanese Subjects with  
21 T2D. Diabetes; 2009.  
22
- 23 (103) Zdravkovic M. Effect of Liraglutide on Blood Glucose Control in Subjects With Type 2  
24 Diabetes. www clinicaltrials gov [ 2006  
25
- 26 (104) Kanda T. Effects of Oral Antidiabetic Agent on Carbohydrate and Lipid Metabolism in  
27 Mildly Obese Patients with Diabetes Mellitus: A Randomized Comparative Study of  
28 Acarbose and Sulfonylurea. Rinsho to Kenkyu (The Japanese Journal of Clinical and  
29 Experimental Medicine) 1998; 75(12):2757-2763.  
30
- 31 (105) Kanoun F, Ben Rehaïem B, Mekaouar A, Abdennebi E, Ftouhi B, Idriss S et al. Secondary  
32 failure of oral hypoglycaemic agents (OHA) in the treatment of non insulin-dependent  
33 diabetic (NIDDM) patients: Effects of carbohydrate and caloric restrictive diet. Revue  
34 Francaise d'Endocrinologie Clinique - Nutrition et Metabolisme 1996; 37(6):529-536.  
35
- 36 (106) Kovacevic I, Profozic V, Skrabalo Z, Cabrijan T, Zjadic-Rotkvic V, Goldoni V et al.  
37 Multicentric clinical trial to assess efficacy and tolerability of acarbose (BAY G 5421) in  
38 comparison to glibenclamide and placebo. Diabetologia Croatica 1997; 26(2):83-89.  
39
- 40 (107) Langenfeld MR, Forst T, Hohberg C, Kann P, Lübben G, Konrad T et al. Pioglitazone  
41 decreases carotid intima-media thickness independently of glycemic control in patients with  
42 type 2 diabetes mellitus: results from a controlled randomized study. Circulation 2005;  
43 111(19):2525-2531.  
44
- 45 (108) Lecomte MJ, Luyckx AS, Lefebvre PJ. Plasma glucagon and clinical control of maturity-  
46 onset type diabetes. Effects of diet, placebo and glipizide. Diabete et Metabolisme 1977;  
47 3(4):239-243.  
48
- 49 (109) Levy J, Vandenberg M, Grunberger G. Insulin versus glipizide treatment in patients with  
50 non-insulin-dependent diabetes mellitus. Effects on blood pressure and glucose tolerance.  
51 American Journal of Hypertension 1995; 8(5 I):445-453.  
52
- 53 (110) Li H, Li W, Gu Y, Han Y, Wang J, Xu B et al. Comparison of continual insulin or  
54 secretagogue treatment in type 2 diabetic patients with alternate insulin-secretagogue  
55  
56  
57  
58  
59  
60

- administration.[Erratum appears in *Diabetes Res Clin Pract.* 2009 Sep;85(3):342]. *Diabetes Research & Clinical Practice* 2009; 84(2):158-162.
- (111) Lim P, Khoo OT. Metformin compared with tolbutamide in the treatment of maturity-onset diabetes mellitus. *The Medical Journal of Australia* 1970; 1(6):271-273.
- (112) Lindbjerg IF, Christoffersen EM, Kuusisto A, Lodahl K, Sagild U, Sterling N et al. Clinical comparison between glibornuride (Glutril) and tolbutamide in maturity-onset diabetes: a controlled double-blind trial. *Current Therapeutic Research, Clinical and Experimental* 1976; 20(3):277-282.
- (113) Liu GC, Coulston AM, Lardinois CK, Hollenbeck CB, Moore JG, Reaven GM. Moderate weight loss and sulfonylurea treatment of non-insulin-dependent diabetes mellitus. Combined effects. *Archives of Internal Medicine* 1985; 145(4):665-669.
- (114) Lomuscio A, Vergani D, Marano L, Castagnone M, Fiorentini C. Effects of glibenclamide on ventricular fibrillation in non-insulin-dependent diabetics with acute myocardial infarction. *Coronary Artery Disease* 1994; 5(9):767-771.
- (115) Madsbad S, Kilhovd B, Lagert I, Mustajoki P, Dejgaard A. Comparison between repaglinide and glipizide in Type 2 diabetes mellitus: A 1-year multicentre study. *Diabetic Medicine* 2001; 18(5):395-401.
- (116) Mafauzy M. Repaglinide versus glibenclamide treatment of Type 2 diabetes during Ramadan fasting. *Diabetes Research & Clinical Practice* 2002; 58(1):45-53.
- (117) Marbury T, Huang WC, Strange P, Lebovitz H. Repaglinide versus glyburide: a one-year comparison trial. *Diabetes Research and Clinical Practice* 1999; 43(3):155-166.
- (118) Mazzone T, Meyer PM, Feinstein SB, Davidson MH, Kondos GT, RB et DÃg. Effect of pioglitazone compared with glimepiride on carotid intima-media thickness in type 2 diabetes: a randomized trial. *JAMA : the journal of the American Medical Association* 2006; 296(21):2572.
- (119) Memisogullari R, Akcay F, Coskun A, Korkmaz U. Comparison of gliclazide treatment with diet therapy on acute phase protein levels in patients with type 2 diabetes. *Turkish Journal of Medical Sciences* 2009; 39(1):73-76.
- (120) Meneilly GS. Effect of repaglinide versus glyburide on postprandial glucose and insulin values in elderly patients with type 2 diabetes. *Diabetes Technology and Therapeutics* 2011; 13(1):63-65.
- (121) Mogensen EF, Worm J, Mikkelsen BO. Clinical comparison between glibornuride (Glutril) and glibenclamide in maturity-onset diabetes: a controlled double-blind trial. *Current Therapeutic Research, Clinical and Experimental* 1976; 19(6):559-564.
- (122) Nakamura T, Ushiyama C, Shimada N, Hayashi K, Ebihara I, Koide H. Comparative effects of pioglitazone, glibenclamide, and voglibose on urinary endothelin-1 and albumin excretion in diabetes patients. *Journal of Diabetes and Its Complications* 2000; 14(5):250-254.

- 1  
2  
3  
4 (123) Nakamura T, Matsuda T, Kawagoe Y, Ogawa H, Takahashi Y, Sekizuka K et al. Effect of  
5 pioglitazone on carotid intima-media thickness and arterial stiffness in type 2 diabetic  
6 nephropathy patients. *Metabolism: Clinical and Experimental* 2004; 53(10):1382-1386.  
7
- 8 (124) Nakamura T, Sugaya T, Kawagoe Y, Ueda Y, Koide H. Effect of pioglitazone on urinary  
9 liver-type fatty acid-binding protein concentrations in diabetes patients with  
10 microalbuminuria. *Diabetes/Metabolism Research and Reviews* 2006; 22(5):385-389.  
11
- 12 (125) Nathan DM, Roussel A, Godine JE. Glyburide or insulin for metabolic control in non-  
13 insulin-dependent diabetes mellitus. A randomized, double-blind study. *Annals of Internal*  
14 *Medicine* 1988; 108(3):334-340.  
15
- 16 (126) Nikkilä K, Groop L. Glibenclamide and gliquidone in the treatment of non-insulin-  
17 dependent diabetes mellitus. *Acta Medica Scandinavica* 1982; 211(1-2):13-17.  
18
- 19 (127) Nissen SE, Nicholls SJ, Wolski K, Nesto R, Kupfer S, Perez A et al. Comparison of  
20 pioglitazone vs glimepiride on progression of coronary atherosclerosis in patients with type  
21 2 diabetes: the PERISCOPE randomized controlled trial. *JAMA* 2008; 299(13):1561-1573.  
22
- 23 (128) Noury J, Nandeuil A. Comparative three-month study of the efficacies of metformin and  
24 gliclazide in the treatment of NIDD. *Diabète & Métabolisme* 1991; 17(1 Pt 2):209-212.  
25
- 26 (129) Omrani GHR, Lari OB, Mehdizadeh AR, Zare N, Saadat N. Comparison of serum  
27 homocysteine level in Metformin versus glibenclamide treated type 2 DM patients. *Iranian*  
28 *Journal of Diabetes and Lipid Disorders* 2005; 4(2):E4+E4i-E4viii.  
29
- 30 (130) Osei K, Rhinesmith S, Gaillard T, Schuster D. Metabolic effects of chronic glipizide  
31 gastrointestinal therapeutic system on serum glucose, insulin secretion, insulin sensitivity,  
32 and hepatic insulin extraction in glucose-tolerant, first-degree relatives of African American  
33 patients with type 2 diabetes: new insights on mechanisms of action. *Metabolism: Clinical*  
34 *and Experimental* 2003; 52(5):565-572.  
35
- 36 (131) Papa G, Fedele V, Rizzo MR, Fioravanti M, Leotta C, Solerte Se. Safety of type 2 diabetes  
37 treatment with repaglinide compared with glibenclamide in elderly people: A randomized,  
38 open-label, two-period, cross-over trial. *Diabetes Care* 2006; 29(8):1918-1920.  
39
- 40 (132) Marena S, Pagani A, Montegrosso G, Boella G, Pagano A, De Michieli F et al. Comparison  
41 of miglitol and glibenclamide in non insulin-dependent diabetic patients. *Giornale Italiano di*  
42 *Diabetologia* 1993; 13(4):383-388.  
43
- 44 (133) Pagano G, Marena S, Corgiat-Mansin L, Cravero F, Giorda C, Bozza M et al. Comparison  
45 of miglitol and glibenclamide in diet-treated type 2 diabetic patients. *Diabète &*  
46 *Métabolisme* 1995; 21(3):162-167.  
47
- 48 (134) Marena S, Pagani A. Miglitol vs glibenclamide in non-insulin dependent diabetes mellitus  
49 [abstract]. *European Journal of Clinical Investigation* 1993; 23 Suppl 1:A43.  
50
- 51 (135) Perez A, Spanheimer R, Khan M. Glycaemic Control in Patients With Type 2 Diabetes: the  
52 Effects of Pioglitazone Vs Glyburide in a 3-Year Randomized Double-Blind Trial.  
53 *Diabetologia* 2006; 49:0807.  
54  
55  
56  
57  
58  
59  
60



- 1  
2  
3  
4 (136) Perriello G, Pampanelli S, Di Pietro C, Brunetti P, Italian Pioglitazone S. Comparison of  
5 glycaemic control over 1 year with pioglitazone or gliclazide in patients with Type 2  
6 diabetes. *Diabetic Medicine* 2006; 23(3):246-252.  
7
- 8 (137) Perriello G, Pampanelli S, Brunetti P, Di Pietro C, Mariz S, Italian Pioglitazone S. Long-  
9 term effects of pioglitazone versus gliclazide on hepatic and humoral coagulation factors in  
10 patients with type 2 diabetes. *Diabetes & Vascular Disease Research* 2007; 4(3):226-230.  
11
- 12 (138) Quatraro A, Consoli G, Magno M, Caretta F, Nardoza A, Ceriello A et al.  
13 Hydroxychloroquine in decompensated, treatment-refractory noninsulin-dependent diabetes  
14 mellitus. A new job for an old drug? *Annals of Internal Medicine* 1990; 112(9):678-681.  
15
- 16 (139) Rao VU, Alokozai D, Voloshko P, Schiller NB. Effect of the dual peroxisome proliferator-  
17 activated receptor alpha/gamma agonist, muraglitazar, on cardiac structure and function in  
18 type 2 diabetic patients. *Journal of the American College of Cardiology* 2010; Conference:  
19 American College of Cardiology's 59th Annual Scientific Session and i2 Summit:  
20 Innovation in Intervention Atlanta, GA United States.  
21
- 22 (140) Center for Drug Evaluation and Research. [http://www.accessdata.fda](http://www.accessdata.fda.gov/drugsatfda_docs/nda/2000/020741_S009_PRANDIN_TABS_AP.pdf)  
23 [gov/drugsatfda\\_docs/nda/2000/020741\\_S009\\_PRANDIN\\_TABS\\_AP.pdf](http://www.accessdata.fda.gov/drugsatfda_docs/nda/2000/020741_S009_PRANDIN_TABS_AP.pdf)  
24
- 25 (141) Novo Nordisk. Unpublished data for trial: AGEE/DCD/047/B/F/I. 1997.  
26
- 27 (142) Novo Nordisk. Unpublished data for trial: AGEE/DCD/046/UK. 1997.  
28
- 29 (143) Rosenstock J, Corrao PJ, Goldberg RB, Kilo C. Diabetes control in the elderly: a  
30 randomized, comparative study of glyburide versus glipizide in non-insulin-dependent  
31 diabetes mellitus. *Clinical Therapeutics* 1993; 15(6):1031-1040.  
32
- 33 (144) Mauersberger H, Rosenthal JH. -Wirkung von endogenem Insulin sowie Acarbose oder  
34 Glibenclamide in der Therapie der Hypertonie bei Typ-2 Diabetikern. *CF-Journal* 2001;  
35 1:26-28.  
36
- 37 (145) Rosenthal J, Mauersberger H. Hypertension in type 2 diabetic patients- effects of  
38 endogenous insulin and antidiabetic therapies. *The American Journal of Hypertension* 2000;  
39 13(4 Suppl 1):S81.  
40
- 41 (146) Rosenthal JH, Mauersberger H. Effects on blood pressure of the alpha-glucosidase inhibitor  
42 acarbose compared with the insulin enhancer glibenclamide in patients with hypertension  
43 and type 2 diabetes mellitus. *Clinical Drug Investigation* 2002; 22(10):701.  
44
- 45 (147) Home PD, Pocock SJ, Beck-Nielsen H, Curtis PS, Gomis R, Hanfeld M et al. Rosiglitazone  
46 evaluated for cardiovascular outcomes in oral agent combination therapy for type 2 diabetes  
47 (RECORD): a multicentre, randomised, open-label trial. *Lancet* 2009; 373(9681):2125-  
48 2135.  
49  
50  
51  
52  
53  
54  
55  
56  
57  
58  
59  
60

- 1  
2  
3  
4 (148) Rupprecht E, König E, Limmer J. Clinical evaluation of gliquidone-short acting  
5 sulfonylurea derivative-comparison with glibenclamide and gliclazide. *Polski Tygodnik*  
6 *Lekarski* 1993; 48(Suppl 1):31-32.  
7
- 8 (149) Saadatnia M, Siavash M, Amini A, Hamid A. Cognitive impairment in type 2 diabetic  
9 patients using metformin or sulfonylurea: A comparative study. Conference: Alzheimer's  
10 Association International Conference on Alzheimer's Disease Vienna Austria 2009.  
11
- 12 (150) Salman S, Salman F, Satman I, Yilmaz Y, Özer E, Sengül A et al. Comparison of acarbose  
13 and gliclazide as first-line agents in patients with type 2 diabetes. *Current Medical Research*  
14 *and Opinion* 2001; 16(4):296-306.  
15
- 16 (151) Sami T, Kabadi UM, Moshiri S. The effect on metabolic control of second-generation  
17 sulfonylurea drugs in patients with NIDDM after secondary failure to first-generation  
18 agents. *The Journal of Family Practice* 1996; 43(4):370-374.  
19
- 20 (152) Sasahara T, Jerums G, Nestel P. Effects of insulin therapy and glycemic control on  
21 distribution of HDL alpha and pre-beta subfractions in non insulin-dependent diabetic  
22 subjects. *Nutrition, Metabolism, and Cardiovascular Diseases* 1999; 9(1):19-24.  
23
- 24 (153) Schernthaner G, Grimaldi A, Di Mario U, Drzewoski J, Kempler P, Kvapil M et al. GUIDE  
25 study: double-blind comparison of once-daily gliclazide MR and glimepiride in type 2  
26 diabetic patients. *European Journal of Clinical Investigation* 2004; 34(8):535-542.  
27
- 28 (154) Seck T, Nauck M, Sheng D, Sunga S, Davies MJ, Stein Pe. Safety and efficacy of treatment  
29 with sitagliptin or glipizide in patients with type 2 diabetes inadequately controlled on  
30 metformin: A 2-year study. *International Journal of Clinical Practice* 2010; 64(5):562-576.  
31
- 32 (155) Segal P, Feig PU, Schernthaner G, Ratzmann KP, Rybka J, Petzinna D et al. The efficacy  
33 and safety of miglitol therapy compared with glibenclamide in patients with NIDDM  
34 inadequately controlled by diet alone. *Diabetes Care* 1997; 20(5):687-691.  
35
- 36 (156) Shihara N, Kitaoka M, Inagaki N, Kadowaki T, Koumoto S, Satoh J et al. Randomized  
37 controlled trial of single-agent glimepiride and pioglitazone in Japanese patients with type 2  
38 diabetes: A comparative study. *Journal of Diabetes Investigation* 2011; doi: 10.1111/j.2040-  
39 1124.2011.00115.x.  
40
- 41 (157) Shihara N. A Comparative Study of Insulin Secretagogue (SU Agent) and Insulin sensitizers  
42 (TZD). <http://apps.who.int/trialsearch/trial.aspx?trialid=JPRN-UMIN000004582>  
43
- 44 (158) Shinoda Y, Inoue I, Nakano T, Goto S, Katayama S. Treatment with glimepiride, but not  
45 mitiglinide and short-acting insulin, resists body weight and abdominal fat reduction under  
46 dietary energy-restriction. *Journal of Diabetes; Conference proceeding; 2009.*  
47
- 48 (159) Speiser P, Schernthaner G. Sulfonylurea omission leads to a significant deterioration of  
49 metabolic state in diabetes mellitus type II: A placebo-controlled double-blind study.  
50 *Klinische Wochenschrift* 1989; 67(Suppl 16):204.  
51
- 52 (160) Fölsch UR, Spengler M, Boehme K, Sommerauer B. Efficacy of glucosidase inhibitors  
53 compared to sulphonylureas in the treatment and metabolic control of diet treated type 2  
54  
55  
56  
57  
58  
59  
60

- 1  
2  
3  
4 diabetic subjects: two long-term comparative studies. *Diabetes, Nutrition and Metabolism* 1990; 3(Suppl. 1):63-68.  
5  
6
- 7 (161) Spengler M, Hänsel G, Boehme K. Efficacy of 6 months monotherapy with glucosidase  
8 inhibitor Acarbose versus sulphonylurea glibenclamide on metabolic control of dietary  
9 treated type II diabetics (NIDDM). *Hormone and Metabolic Research Supplement Series*  
10 1992; 26(Suppl. 26):50-51.  
11
- 12 (162) Spengler M, Hänsel G, Boehme K. 6 months monotherapy of NIDDM with acarbose or  
13 glibenclamide. In: Lefébvre PJ, Standl E, editor(s) *New Aspects in Diabetes Treatment*  
14 *strategies with Alpha-Glucosidase Inhibitors Third International Symposium on Acarbose*  
15 *Berlin-New York: Walter de Gruyter 1992;243-246.*  
16
- 17 (163) Spengler M, Hänsel M, Boehme K. Acarbose and glibenclamide in type II diabetes.  
18 *Zeitschrift für Allgemeinmedizin* 1990; 65(22):606-610.  
19
- 20 (164) Spengler N, Hänsel G, Boehme K. Efficacy of 6 months monotherapy with glucosidase  
21 inhibitor acarbose versus sulphonylurea glibenclamid on metabolic control of dietary treated  
22 type II diabetics. *European Journal of Clinical Investigation* 1989; 19 (2 Pt II):A71.  
23
- 24 (165) Sung BH, Izzo JL J, Dandona P, Wilson MF. Vasodilatory effects of troglitazone improve  
25 blood pressure at rest and during mental stress in type 2 diabetes mellitus. *Hypertension*  
26 1999; 34(1):83-88.  
27
- 28 (166) Bakris GL, Ruilope LM, McMorn SO, Weston WM, Heise MA, Freed MI et al.  
29 Rosiglitazone reduces urinary albumin excretion. *Journal of Human Hypertension* 2003;  
30 17(1):7-12.  
31
- 32 (167) St John Sutton M, Rendell M, Dandona P, Dole JF, Murphy K, Patwardhan R et al. A  
33 comparison of the effects of rosiglitazone and glyburide on cardiovascular function and  
34 glycemic control in patients with type 2 diabetes. *Diabetes Care* 2002; 25(11):2058-2064.  
35
- 36 (168) Tan M, Johns D, González G, Antón O, Fabián G, Flores-Lozano F et al.  
37 Effects of pioglitazone and glimepiride on glycemic control and insulin sensitivity in  
38 Mexican patients with type 2 diabetes mellitus: A multicenter, randomized, double-blind,  
39 parallel-group trial. *Clinical Therapeutics* 2004; 26(5):680-693.  
40
- 41 (169) Tan MH, Johns D, Strand J, Halse J, Madsbad S, Eriksson JW et al. Sustained effects of  
42 pioglitazone vs. glibenclamide on insulin sensitivity, glycaemic control, and lipid profiles in  
43 patients with Type 2 diabetes. *Diabetic Medicine: a journal of the British Diabetic*  
44 *Association* 2004; 21(8):859-866.  
45
- 46 (170) Tan MH, Baksi A, Krahulec B, Kubalski P, Stankiewicz A, Urquhart R et al. Comparison of  
47 pioglitazone and gliclazide in sustaining glycemic control over 2 years in patients with type  
48 2 diabetes. *Diabetes Care* 2005; 28(3):544-550.  
49
- 50 (171) Teramoto T, Yamada N, Shirai K, Saito Y. Effects of pioglitazone hydrochloride on  
51 Japanese patients with type 2 diabetes mellitus. *Journal of Atherosclerosis and Thrombosis*  
52 2007; 14(2):86-93.  
53  
54  
55  
56  
57  
58  
59  
60

- 1  
2  
3  
4 (172) Garber A, Henry R, Ratner R, Hale P, Chang CT, Bode B. Liraglutide, a human GLP-1  
5 analogue, offers sustained and greater reduction in HbA1c, fasting plasma glucose and  
6 weight compared with glimepiride over 2 years, with lower hypoglycaemic risk, in patients  
7 with Type 2 diabetes: LEAD-3 extension study. *Diabetic Medicine*; Conference proceeding;  
8 2009.  
9
- 10 (173) Garber A, Henry RR, Ratner R, Hale P, Chang CT, Bode B. Liraglutide, a once-daily human  
11 glucagon-like peptide 1 analogue, provides sustained improvements in glycaemic control  
12 and weight for 2 years as monotherapy compared with glimepiride in patients with type 2  
13 diabetes. *Diabetes, Obesity and Metabolism* 2011; 13(4):348-356.  
14
- 15 (174) Garber A, Henry R, Ratner R, Garcia-Hernandez PA, Rodriguez-Pattzi H, Olvera-Alvarez I  
16 et al. Liraglutide versus glimepiride monotherapy for type 2 diabetes (LEAD-3 Mono): a  
17 randomised, 52-week, phase III, double-blind, parallel-treatment trial. *Lancet* 2009;  
18 373(9662):473-481.  
19
- 20 (175) Garber AJ, Henry R, Ratner R, Hale P, Chang CT, Bode B. Liraglutide, a human GLP-1  
21 analogue, maintains greater reductions in HbA1c, FPG and weight than glimepiride over 2  
22 years in patients with type 2 diabetes: LEAD-3 extension study. *Diabetologia* 2009;  
23 Conference: 45th EASD Annual Meeting of the European Association for the Study of  
24 Diabetes Vienna Austria.  
25
- 26 (176) Hale P. To Evaluate the Effect of Liraglutide Versus Glimepiride (Amaryl©) on  
27 Haemoglobin A1c (LEAD-3). [ClinicalTrials.gov](http://ClinicalTrials.gov)  
28
- 29 (177) Bode BW, Testa MA, Magwire M, Hale PM, Hammer M, Blonde L et al. Patient-reported  
30 outcomes following treatment with the human GLP-1 analogue liraglutide or glimepiride in  
31 monotherapy: results from a randomized controlled trial in patients with type 2 diabetes.  
32 *Diabetes, Obesity and Metabolism* 2010; 12(7):604-612.  
33
- 34 (178) Tolman KG, Freston JW, Kupfer S, Perez A. Liver safety in patients with type 2 diabetes  
35 treated with pioglitazone: results from a 3-year, randomized, comparator-controlled study in  
36 the US. *Drug Safety* 2009; 32(9):787-800.  
37
- 38 (179) Tovi J, Svanborg E, Nilsson BY, Engfeldt P. Diabetic neuropathy in elderly Type 2 diabetic  
39 patients: effects of insulin treatment. *Acta Neurologica Scandinavica* 1998; 98(5):346-353.  
40
- 41 (180) Toyota T, Fukao A, Kaneko T, Suda T, Maruhama Y, Sato J. [Clinical Evaluation of  
42 Glimepiride (HOE490) in Non-Insulin-Dependent Diabetes Mellitus: A Double-Blind  
43 Placebo-Controlled Study/Phase III Additional Study]. *Rinsho Iyaku (Journal of Clinical  
44 Therapeutics and Medicines)* 1997; 13(17):4457-4478.  
45
- 46 (181) Tsumura K. Clinical evaluation of glimepiride (HOE490) in NIDDM, including a double  
47 blind comparative study versus gliclazide. *Diabetes Research and Clinical Practice* 1995; 28  
48 Suppl:147-149.  
49
- 50 (182) Umpierrez GE, Clark WS, Steen MT. Sulfonylurea treatment prevents recurrence of  
51 hyperglycemia in obese African-American patients with a history of hyperglycemic crises.  
52 *Diabetes Care* 1997; 20(4):479-483.  
53  
54  
55  
56  
57  
58  
59  
60

- 1  
2  
3  
4 (183) The University Group Diabetes Program. A study of the effects of hypoglycemic agents on  
5 vascular complications in patients with adult-onset diabetes. I. Design, methods and baseline  
6 results. *Diabetes* 1970; 19(2):747-783.  
7
- 8 (184) The University Group Diabetes Program. A study of the effects of hypoglycemic agents on  
9 vascular complications in patients with adult-onset diabetes. VI. Supplementary report on  
10 nonfatal events in patients treated with tolbutamide. *Diabetes* 1976; 25:1129-1153.  
11
- 12 (185) The University Group Diabetes Program. A study of the effects of hypoglycemic agents on  
13 vascular complications in patients with adult-onset diabetes. II. Mortality results. *Diabetes*  
14 1970; 19(suppl 3):789-830.  
15
- 16 (186) Clarke PM, Gray AM, Briggs A, Stevens RJ, Matthews DR, Holman RR et al. Cost-utility  
17 analyses of intensive blood glucose and tight blood pressure control in type 2 diabetes  
18 (UKPDS 72). *Diabetologia* 2005; 48(5):868-877.  
19
- 20 (187) Matthews DR, Cull CA, Stratton IM, Holman RR, Turner RC. UKPDS 26: Sulphonylurea  
21 failure in non-insulin-dependent diabetic patients over six years. *Diabetic Medicine* 1998;  
22 15(4):297-303.  
23
- 24 (188) Mehta Z, Cull C, Stratton I, Yudkin J, Jenkinson C, Fletcher A et al. Quality of life in type 2  
25 diabetic patients is affected by complications but not by intensive policies to improve blood  
26 glucose or blood pressure control (UKPDS 37). *Diabetes Care* 1999; 22(7):1125-1136.  
27
- 28 (189) UK Prospective Diabetes Study Group. Intensive blood-glucose control with sulphonylureas  
29 or insulin compared with conventional treatment and risk of complications in patients with  
30 type 2 diabetes (UKPDS 33). *Lancet* 1998; 352(9131):837-853.  
31
- 32 (190) Wright A, Burden AC, Paisey RB, Cull CA, Holman RR, UKProspective Diabetes S.  
33 Sulfonylurea inadequacy: efficacy of addition of insulin over 6 years in patients with type 2  
34 diabetes in the U.K. Prospective Diabetes Study (UKPDS 57). *Diabetes Care* 2002;  
35 25(2):330-336.  
36
- 37 (191) Van de Laar FA, Lucassen PLBJ, Kemp J, Van de Lisdonk EH, Van Weel C, Rutten  
38 GEHM. Is acarbose equivalent to tolbutamide as first treatment for newly diagnosed type 2  
39 diabetes in general practice?: A randomised controlled trial. *Diabetes Research and Clinical*  
40 *Practice* 2004; 63(1):57-65.  
41
- 42 (192) Vray M, Attali JR. Randomized study of glibenclamide versus traditional Chinese treatment  
43 in type 2 diabetic patients. *Diabete et Metabolisme* 1995; 21(6):433-439.  
44
- 45 (193) Wang WL, Zhang BZ, Zhang SL, Xu DF, Wei XH. Multicenter randomized controlled trial  
46 of domestic gliclazide and tolbutamide in the treatment of non-insulin-dependent diabetes  
47 mellitus. *Chinese Journal of Pharmacoepidemiology* 1994; 3(3):119-121.  
48
- 49 (194) Watanabe I, Tani S, Anazawa T, Kushiro T, Kanmatsuse K. Effect of pioglitazone on  
50 arteriosclerosis in comparison with that of glibenclamide. *Diabetes Research and Clinical*  
51 *Practice* 2005; 68(2):104-110.  
52  
53  
54  
55  
56  
57  
58  
59  
60



- 1  
2  
3  
4 (195) Wolffenbuttel BH, Weber RF, van Koetsveld PM, Weeks L, Verschoor L. A randomized  
5 crossover study of sulphonylurea and insulin treatment in patients with type 2 diabetes  
6 poorly controlled on dietary therapy. *Diabetic Medicine* 1989; 6(6):520-525.  
7
- 8 (196) Wolffenbuttel BH, Landgraf R. A 1-year multicenter randomized double-blind comparison  
9 of repaglinide and glyburide for the treatment of type 2 diabetes. Dutch and German  
10 Repaglinide Study Group. *Diabetes Care* 1999; 22(3):463-467.  
11
- 12 (197) Wu CZ, Pei D, Hsieh AT, Wang K, Lin JD, Lee LH et al. Comparison of insulin sensitivity,  
13 glucose sensitivity, and first phase insulin secretion in patients treated with repaglinide or  
14 gliclazide. *Archives of Pharmacal Research* 2010; 33(3):411-416.  
15
- 16 (198) Yang Z, Zhou Z, Li X, Huang G, Lin J. Rosiglitazone preserves islet beta-cell function of  
17 adult-onset latent autoimmune diabetes in 3 years follow-up study. *Diabetes Research and  
18 Clinical Practice* 2009; 83(1):54-60.  
19
- 20 (199) Zhang YN, Cui C, Chang ML, Wu W, Yu WG, Liu FC et al. Interventional effects of  
21 rosiglitazone in type 2 diabetes elderly male patients combined with atherosclerosis. *Chinese  
22 Journal of Clinical Rehabilitation* 2005; 9(39):58-61.  
23
- 24 (200) Zhou, W. [60 cases of type II diabetes mellitus treated by Zishen Jiangtang Decoction  
25 compared with 25 cases treated by Glibenclamide in the control group]. *Journal Title:  
26 Zhejiang Journal of Traditional Chinese Medicine [Zhe Jiang Zhong Yi Za Zhi]*  
27 1999;(8):328.  
28
- 29 (201) GlaxoSmithKline. Diabetes Study With Rosiglitazone Monotherapy Versus Metformin Or  
30 Glyburide/Glibenclamide. [ClinicalTrials.gov](http://ClinicalTrials.gov)  
31
- 32 (202) Home PD, Kahn SE, Jones NP, Noronha D, Beck-Nielsen H, Viberti G et al. Experience of  
33 malignancies with oral glucose-lowering drugs in the randomised controlled ADOPT (A  
34 Diabetes Outcome Progression Trial) and RECORD (Rosiglitazone Evaluated for  
35 Cardiovascular Outcomes and Regulation of Glycaemia in Diabetes) clinical trials.  
36 *Diabetologia* 2010; 53(9):1838-1845.  
37
- 38 (203) Kahn SE, Haffner SM, Heise MA, Herman WH, Holman RR, Jones NP et al. Glycemic  
39 durability of rosiglitazone, metformin, or glyburide monotherapy.[Erratum appears in N  
40 Engl J Med. 2007 Mar 29;356(13):1387-8]. *New England Journal of Medicine* 2006;  
41 355(23):2427-2443.  
42
- 43 (204) Krall RL. Cardiovascular safety of rosiglitazone. *The Lancet* 2007; 369(9578):1995-1996.  
44
- 45 (205) Lachin JM, Viberti G, Zinman B, Haffner SM, Aftring RP, Paul G et al. Renal function in  
46 type 2 diabetes with rosiglitazone, metformin, and glyburide monotherapy. *Clinical Journal  
47 of the American Society of Nephrology* 2011; 6(5):1032-1040.  
48
- 49 (206) Viberti G, Kahn SE, Greene DA, Herman WH, Zinman B, Holman RR et al. A diabetes  
50 outcome progression trial (ADOPT): an international multicenter study of the comparative  
51 efficacy of rosiglitazone, glyburide, and metformin in recently diagnosed type 2 diabetes.  
52 *Diabetes Care* 2002; 25(10):1737-1743.  
53  
54  
55  
56  
57  
58  
59  
60

- 1  
2  
3  
4 (207) Viberti G, Lachin J, Holman R, Zinman B, Haffner S, Kravitz B et al. A Diabetes Outcome  
5 Progression Trial (ADOPT): baseline characteristics of Type 2 diabetic patients in North  
6 America and Europe. *Diabetic Medicine* 2006; 23(12):1289-1294.  
7
- 8 (208) Campbell IW, Menzies DG, Chalmers J, McBain AM, Brown IRF. One year comparative  
9 trial of metformin and glipizide in type 2 diabetes mellitus. *Diabète et Métabolisme* 1994;  
10 20(4):394-400.  
11
- 12 (209) Collier A, Watson HH, Patrick AW, Ludlam CA, Clarke BF. Effect of glycaemic control,  
13 metformin and gliclazide on platelet density and aggregability in recently diagnosed type 2  
14 (non-insulin-dependent) diabetic patients. *Diabète & Métabolisme* 1989; 15(6):420-425.  
15
- 16 (210) DeFronzo RA, Goodman AM, and the Multicenter Metformin Study. Efficacy of metformin  
17 in patients with non-insulin-dependent diabetes mellitus. *New England Journal of Medicine*  
18 1995; 333(9):541-549.  
19
- 20 (211) Derosa G, Franzetti I, Gadaleta G, Ciccarelli L, Fogari R. Metabolic variations with oral  
21 antidiabetic drugs in patients with Type 2 diabetes: comparison between glimepiride and  
22 metformin. *Diabetes, Nutrition & Metabolism* 2004; 17(3):143-50.  
23
- 24 (212) Hermann LS, Karlsson JE, Sjöstrand A. Prospective comparative study in NIDDM patients  
25 of metformin and glibenclamide with special reference to lipid profiles. *European Journal of*  
26 *Clinical Pharmacology* 1991; 41(3):263-265.  
27
- 28 (213) Hermann LS, Bitzén PO, Kjellström T, Lindgärde F, Scherstén B. Comparative efficacy of  
29 metformin and glibenclamide in patients with non-insulin-dependent diabetes mellitus.  
30 *Diabète & Métabolisme* 1991; 17:201-208.  
31
- 32 (214) Hermann LS, Kjellström T, Nilsson-Ehle P. Effects of metformin and glibenclamide alone  
33 and in combination on serum lipids and lipoproteins in patients with non-insulin-dependent  
34 diabetes mellitus. *Diabète & Métabolisme* 1991; 17:174-179.  
35
- 36 (215) Hermann LS, Scherstén B, Melander A. Antihyperglycaemic efficacy, response prediction  
37 and dose-response relations of treatment with metformin and sulphonylurea, alone and in  
38 primary combination. *Diabetic Medicine* 1994; 11(10):953-960.  
39
- 40 (216) Hermann LS, Scherstén B, Bitzén PO, Kjellström T, Lindgärde F, Melander A. Therapeutic  
41 comparison of metformin and sulfonylurea, alone and in various combinations. A double-  
42 blind controlled study. *Diabetes Care* 1994; 17(10):1100-1109.  
43
- 44 (217) Kamel AN, Cetinarslan B, Uysal AR, Baskal N, Corapcioglu D, Tonyukuk V. Efficacy of  
45 Monotherapy With Acarbose, Glibenclamide, Gliclazide, Metformin or Placebo in Niddm  
46 Patients. *Diabetologia* 1997; 40(Suppl 1):1255.  
47
- 48 (218) Lawrence JM, Reid J, Taylor GJ, Stirling C, Reckless JP. Favorable effects of pioglitazone  
49 and metformin compared with gliclazide on lipoprotein subfractions in overweight patients  
50 with early type 2 diabetes. *Diabetes Care* 2004; 27(1):41-46.  
51
- 52 (219) Tang JZ, Mao JP, Yang ZF, Zhou ZG, Tang WL, Feng Q. Effects of glimepiride and  
53 metformin on free fatty acid in patients with Type 2 diabetes mellitus. *Zhong nan da xue xue*  
54  
55  
56  
57  
58  
59  
60

- 1  
2  
3  
4           bao 2004; Yi xue ban = Journal of Central South University. Medical Sciences. 29(6):631-  
5           634.  
6
- 7           (220) Tessier D, Maheux P, Khalil A, Fülöp T. Effects of gliclazide versus metformin on the  
8           clinical profile and lipid peroxidation markers in type 2 diabetes. *Metabolism: Clinical and*  
9           *Experimental* 1999; 48(7):897-903.  
10
- 11           (221) Tosi F, Muggeo M, Brun E, Spiazzi G, Perobelli L, Zanolin E et al. Combination treatment  
12           with metformin and glibenclamide versus single-drug therapies in type 2 diabetes mellitus: a  
13           randomized, double-blind, comparative study. *Metabolism: Clinical and Experimental* 2003;  
14           52(7):862-867.  
15
- 16           (222) Turner RC, Holman RR, Mathews DR, Oakes SF, Bassett PA, Stratton IM et al. UK  
17           Prospective Diabetes Study (UKPDS). VIII. Study design, progress and performance.  
18           *Diabetologia* 1991; 34(12):877-890.  
19
- 20           (223) UK Prospective Diabetes Study G. Effect of intensive blood-glucose control with metformin  
21           on complications in overweight patients with type 2 diabetes (UKPDS 34). *UK Prospective*  
22           *Diabetes Study (UKPDS) Group. Lancet* 1998; 352(9131):854-865.  
23
- 24           (224) UK Prospective Diabetes Study (UKPDS). United Kingdom Prospective Diabetes Study  
25           (UKPDS) 13: Relative efficacy of randomly allocated diet, sulphonylurea, insulin, or  
26           metformin in patients with newly diagnosed non-insulin dependent diabetes followed for  
27           three years. *BMJ* 1995;(0959-8138 (Print)).  
28
- 29           (225) Yamanouchi T, Sakai T, Igarashi K, Ichiyangi K, Watanabe H, Kawasaki T. Comparison  
30           of metabolic effects of pioglitazone, metformin, and glimepiride over 1 year in Japanese  
31           patients with newly diagnosed Type 2 diabetes. *Diabetic Medicine* 2005; 22(8):980-985.  
32  
33  
34  
35  
36  
37  
38  
39  
40  
41  
42  
43  
44  
45  
46  
47  
48  
49  
50  
51  
52  
53  
54  
55  
56  
57  
58  
59  
60
